## 1 **Genomic and transcriptomic landscape of advanced renal cell cancer to** 2 **individualize treatment strategy**

3 K. de Joode<sup>¥1</sup>, W.S. van de Geer<sup>¥1,2</sup>, G.J.L.H. van Leenders<sup>3</sup>, P. Hamberg<sup>4</sup>, H.M. Westgeest<sup>5</sup>, A. Beeker<sup>6</sup>, S.F.  
4 Oosting<sup>7</sup>, J.M. van Rooijen<sup>8</sup>, L.V. Beerepoot<sup>9</sup>, M. Labots<sup>10</sup>, R.H.J. Mathijssen<sup>1</sup>, M.P. Lolkema<sup>1,11</sup>, E.  
5 Cuppen<sup>12,13</sup>, S. Sleijfer<sup>1,11</sup>, H.J.G. van de Werken<sup>×\*2,14,15</sup>, A.A.M. van der Veldt<sup>×\*1,16</sup>

6 *¥Both authors contributed equally and are considered first author*

7 *×Both authors contributed equally and are considered last author*

8 *\*Corresponding author*

9 <sup>1</sup>Department of Medical Oncology, Erasmus MC Cancer Institute, University Medical Center, Rotterdam,  
10 The Netherlands;

11 <sup>2</sup>Cancer Computational Biology Center, Erasmus MC Cancer Institute, University Medical Center,  
12 Rotterdam, The Netherlands;

13 <sup>3</sup>Department of Pathology, Erasmus MC, Rotterdam, the Netherlands;

14 <sup>4</sup>Department of Internal Medicine, Franciscus Gasthuis & Vlietland, Rotterdam, The Netherlands;

15 <sup>5</sup>Department of Internal Medicine, Amphia Hospital, Breda, The Netherlands;

16 <sup>6</sup>Department of Internal Medicine, Spaarne Gasthuis, Hoofddorp, The Netherlands;

17 <sup>7</sup>Department of Medical Oncology, University Medical Center Groningen, University of Groningen,  
18 Groningen, The Netherlands;

19 <sup>8</sup>Department of Internal Medicine, Martini Hospital, Groningen, The Netherlands;

20 <sup>9</sup>Department of Internal Medicine, Elisabeth-Tweesteden hospital, Tilburg, The Netherlands;

21 <sup>10</sup>Department of Medical Oncology, Amsterdam UMC, Vrije Universiteit Amsterdam, Department of  
22 Medical Oncology, Cancer Center Amsterdam, The Netherlands;

23 <sup>11</sup>Center for Personalized Cancer Treatment, Rotterdam, The Netherlands;

24 <sup>12</sup>Center for Molecular Medicine and OncoCode Institute, University Medical Center Utrecht, Utrecht, The  
25 Netherlands;

26 <sup>13</sup>Hartwig Medical Foundation, Amsterdam, The Netherlands;

27 <sup>14</sup>Department of Urology, Erasmus MC Cancer Institute, University Medical Center, Rotterdam, The  
28 Netherlands;

29 <sup>15</sup>Department of Immunology, Erasmus MC Cancer Institute, University Medical Center, Rotterdam, The  
30 Netherlands;

31 <sup>16</sup>Departments of Radiology & Nuclear Medicine, Erasmus MC, Rotterdam, The Netherlands

32 \*Corresponding author(s)

33 Astrid A.M. van der Veldt, Departments of Medical Oncology and Radiology & Nuclear Medicine,  
34 Erasmus MC Cancer Institute, Dr. Molewaterplein 40, 3015 GD Rotterdam, The Netherlands.

35 Tel: +31 (0)10 704 0 704. E-mail address: a.vanderveldt@erasmusmc.nl

36

37 Harmen J.G. van de Werken, Cancer Computational Bioldatogy Center, Erasmus MC Cancer Institute,  
38 Erasmus University Medical Center Rotterdam, Department of Immunology and Department of Urology,  
39 Internal Postal Address NA-1218-335, PO Box 2040, 3000 CA Rotterdam, the Netherlands.

40 Tel: +31 (0)10 703 1 829. Fax: +31 (0)10 704 4 731. E-mail address: h.vandewerken@erasmusmc.nl

41 **Abstract**

42 The genomic landscape of advanced renal cell cancer (RCC) was characterized for 91 patients to  
43 identify actionable targets and signatures by combining whole-genome sequencing (WGS) with  
44 matched RNA sequencing (RNA-Seq). WGS data were analyzed for somatic small variants, copy-  
45 number alterations (CNAs) and structural variants. Somatic aberrations were analyzed for driver  
46 genes, CNA drivers, mutational signatures, catastrophic events and fusion genes. For papillary  
47 and clear cell RCC, potential actionable drug targets were detected by WGS in 89% and 100% of  
48 the patients, respectively. RNA-Seq data of clear cell and papillary RCC were clustered according  
49 to a previously developed angio-immunogenic gene signature. WGS and RNA-Seq may improve  
50 therapeutic decision making for most patients with advanced RCC, including patients with non-  
51 clear cell RCC for whom no standard treatment is available to date. Prospective clinical trials are  
52 needed to evaluate the impact of genomic and transcriptomic diagnostics on survival outcome  
53 for advanced RCC patients.

## 54 **Introduction**

55 Renal cell carcinoma (RCC) consists of different histological subtypes <sup>1,2</sup>. The most common  
56 histological subtype is clear cell RCC (ccRCC), accounting for approximately 75% of the RCC cases  
57 <sup>3</sup>. The vast majority of ccRCC is characterized by the loss of the short arm of chromosome 3 (3p)<sup>4</sup>,  
58 which harbors several tumor suppressor genes. The function of these genes - *VHL*, *BAP1*, *PBRM1*,  
59 and *SETD2* - is frequently inactivated due to additional somatic mutations or epigenetic changes  
60 of these genes on the other allele <sup>4,5</sup>. Although these genetic aberrations can be observed in most  
61 patients with ccRCC, the clinical behavior in individual patients differs significantly, from slowly  
62 progressive disease over years to rapidly progressive disease with fast clinical deterioration.  
63 Therefore, the management of advanced ccRCC varies from active surveillance to systemic  
64 therapy.

65 In the past years, the therapeutic landscape for patients with advanced ccRCC has changed  
66 significantly. The introduction of tyrosine kinase inhibitors (TKIs) <sup>6,7</sup>, immune checkpoint  
67 inhibitors (ICIs) <sup>8,9</sup>, mammalian target of rapamycin (mTOR) inhibitors <sup>10</sup>, and combinations of  
68 these anti-cancer therapies <sup>11-13</sup>, has significantly improved the outcome for patients with  
69 advanced ccRCC. However, there are considerable interindividual differences in outcome, and  
70 only a minority of patients experience durable responses <sup>14</sup>. For patients with advanced ccRCC,  
71 treatment decision making is nowadays guided by the International Metastatic RCC Database  
72 Consortium (IMDC) criteria <sup>15-17</sup>. These criteria include only clinical patient characteristics (i.e.  
73 hemoglobin level, time from diagnosis to start of systemic therapy, Karnofsky performance state,  
74 calcium level and neutrophil and platelets count).

75 Moreover, RCC with non-clear cell histology is a heterogeneous group of different subtypes, such  
76 as papillary and chromophobe RCC<sup>18</sup>. As holds true for advanced ccRCC, the course of non-clear  
77 cell RCC (nccRCC) differs significantly between patients<sup>19,20</sup>. Since the different nccRCC subtypes  
78 are considered rare diseases, randomized phase three clinical trials are lacking for nccRCC<sup>21</sup>. As  
79 a result, there is no clearly defined standard of care for patients with advanced nccRCC<sup>20,22</sup>.

80 The development of RCC, including its metastatic potential and response to treatment, could  
81 mainly be explained by the different genomics<sup>2,4</sup> and evolutionary pathways<sup>5,23</sup> of this disease.  
82 Previous studies have focused on the molecular characterization of primary RCC<sup>2,4,24</sup> and the  
83 genomic evolution of ccRCC<sup>4,5,23</sup>. For example, RNA expression analysis in ccRCC has identified  
84 different immunogenic and angiogenic gene expression signatures<sup>24,25</sup>, however, predictive  
85 value for treatment efficacy has not been validated. To improve the individualized treatment  
86 strategy and the survival outcomes for patients with ccRCC and nccRCC, more insight into the  
87 genomic make-up of advanced RCC is required.

88 The objective of this study was to describe the genomic landscape of advanced RCC, by combining  
89 whole-genome sequencing (WGS) with matched RNA sequencing (RNA-Seq) data. First, WGS was  
90 applied to characterize the genomic make-up of RCC and to identify potential actionable targets  
91 for systemic treatment in individual patients with ccRCC and nccRCC. Next, both WGS and  
92 matched RNA-Seq data were combined for patients with ccRCC and papillary RCC (pRCC). The  
93 RNA-Seq data were applied to cluster RCC based on immunogenic and angiogenic gene  
94 expression patterns, aiming to identify those patients who could benefit from either treatment  
95 with anti-angiogenic drugs, immunogenic drugs or a combination of these therapies.

## 96 **Results**

### 97 **Patient selection**

98 In total, WGS data from 91 patients with histopathologically confirmed RCC were included in the  
99 analyses (**Figure 1A**). Additional RNA-Seq data were available for 28 patients (**Figure 1A**). Overall,  
100 72 patients were diagnosed with ccRCC, nine patients with pRCC, one with chromophobe RCC,  
101 one with tubulocystic RCC, and one with collecting duct carcinoma. For the remaining seven  
102 patients with RCC, the subtype could not be further defined. The main biopsy sites were the  
103 kidney ( $N = 24$ ), bone ( $N = 15$ ), and lymph nodes ( $N = 14$ ) (**Figure 1B**). The median age of patients  
104 at the time of biopsy was 65 years (range 40-83), 79% of the patients were male, and 78% of the  
105 patients did not receive any systemic treatment before biopsy (**Table 1**). Most patients (84/91,  
106 92%) were treated with systemic therapy after biopsy was collected. This treatment consisted  
107 mostly of TKIs (61/84, 73%) or ICIs (19/84, 23%), whereas the remaining patients received  
108 combination treatment (4/84, 5%). For 68 out of 84 (81%) patients, the first tumor response  
109 (RECIST v1.1 <sup>26</sup>) to treatment (post tumor biopsy) could be established. Most patients had stable  
110 disease (SD) (46%), followed by progressive disease (PD) (14%) and partial response (PR) (14%).

111

112

113

## 114 **Whole-genome sequencing analyses**

115 Somatic small variants, copy-number alterations (CNAs) and structural variants (SVs) were  
116 identified as described previously <sup>27</sup>. The median tumor mutational burden (TMB) of patients  
117 with ccRCC was 2.8 [interquartile range (IQR) 1.1] (**Figure 2A**). Only two patients (one with ccRCC  
118 and one with undefined subtype of RCC) had a TMB > 10 <sup>28</sup>. In both these samples with high TMB,  
119 mutational signatures were related to defective DNA mismatch repair, covering more than 25%  
120 of their single-nucleotide variants (SNVs) (**Figure 2A/E**). Interestingly, the lowest TMB (i.e. 0.16)  
121 was found in a patient with tubulocystic RCC ( $N = 1$ ) who had very little genomic aberrations in  
122 general, and only two detectable SVs (**Figure 2C/D**; tandem duplication and break-end). In the  
123 total cohort, SBS40 (unknown etiology) was the dominant mutational signature, with a mean  
124 relative contribution of 74%. To assess the reliability of the SBS40 calling, the mutational  
125 signature calling was bootstrapped, which revealed a very high variance (median difference in  
126 assignment of 37%) in the relative contribution of SBS40 (Supplementary figure 1).

127 The frequency of genomic SNVs, multi-nucleotide variants (MNVs), InDels, and the collective  
128 coding mutations showed a similar pattern across the different RCC subtypes (Supplementary  
129 figure 2, supplementary data file). In total, 713,077 somatically acquired SNVs, 173,579 InDels  
130 and 9,964 MNVs were detected in the RCC genomes. Transversions were more frequently found  
131 than transitions in ccRCC, pRCC and undefined subtypes (Supplementary figure 2B and 2E).  
132 Missense variants were the most dominant protein variant type and accounted for > 60% of the  
133 small variants in all subtypes (Supplementary figure 2G). The genome ploidy was mostly diploid,  
134 and genome duplications were more frequent in ccRCC than in other subtypes (Supplementary  
135 figure 2D). For 57% of ccRCC, the genome-wide ploidy was 2, while 32% had a genome doubling

136 with a ploidy of 3 or higher. Differences in DNA ploidy have been associated with tumor  
137 differentiation and diploidy has been related to well-differentiated RCC <sup>29</sup>. Considering SVs, a  
138 total of 3,121 deletions, 941 translocations, 2,196 tandem duplications, 4 insertions, 2,714  
139 inversions and 641 break-ends were detected (Supplementary Fig 2F). When comparing the  
140 mutational frequencies of ccRCC in our cohort to those in the TRACERx WGS cohort, a multicenter  
141 prospective study analyzing the evolutionary features of ccRCC <sup>5</sup>, the number of substitutions  
142 was similar in both cohorts (7,224, Q1–Q3: [5648-8581] vs. 7,050, Q1–Q3: [6434-9504], *p*-value  
143 = 0.45). The number of patients with events considered as chromothripsis was limited and  
144 present in only five patients with ccRCC, two patients with pRCC and absent in the other subtypes.  
145 Furthermore, these chromothriptic events mostly did not involve the classic t(3;5) event. Only  
146 one of the samples with chromothripsis did have a t(3;5) translocation (Supplementary figure 3),  
147 while these specific translocations were more frequently detected in the cohort of patients  
148 without chromothriptic events (29.7%, Supplementary figure 4).

149 Next, the WGS data were analyzed on driver genes of the ccRCC samples using the dN/dS  
150 algorithm and on CNAs by GISTIC 2.0. These driver gene analyses revealed that most driver genes  
151 in ccRCC encompassed variations in the chromosome 3p region: *SETD2* (88.9%), *VHL* (73.6%),  
152 *PBRM1* (61.1%), and *BAP1* (16.7%) together with mutations in tumor suppressor genes on other  
153 chromosomes, such as *CDKN2A* (68.1%) and *PTEN* (16.7%) (**Figure 3**, supplementary data file). In  
154 addition, a substantial number of patients with ccRCC had focal deletions in genes described as  
155 possible tumor suppressor genes, e.g. *PTPRD* (59.7%) and *NEGR1* (36.1%) <sup>4,30</sup>. Deletions of *PTPRD*  
156 have been described as a possible risk factor for the development of ccRCC <sup>30,31</sup>. Moreover,  
157 amplifications were present in genes associated with cell proliferation and angiogenesis, such as

158 *CDK6* (55.6%) and *CCNE1* (19.4%)<sup>32,33</sup>. In total, pathogenic germline mutations related to cancer  
159 or Von Hippel-Lindau syndrome were found in nine patients in different RCC subtypes and  
160 included *ATM*, *FLCN*, *CHEK2*, *FH*, *SDHA* and *MITF* (**Figure 3**).

161 In addition, genes which were previously described as frequently mutated somatically ( $q$ -value <  
162 0.05) in (cc)RCC by Braun *et al.*<sup>34</sup> and in pRCC by Turajlic *et al.*<sup>35</sup>, that were not statistically  
163 significant in our driver gene analysis, were included to extend our analysis. Nevertheless, many  
164 of these added genes showed a low mutational frequency in our cohort, similarly for genes  
165 associated with poor prognosis ccRCC<sup>4</sup>, such as the Krebs cycle genes (e.g. *SDHA*, *FH*).

166 Furthermore, previously validated fusion events<sup>36</sup> were detected, with *CLTC-VMP1* and *SFPQ-*  
167 *TFE3* both occurring once in the ccRCC group, along with a fusion event of *ASPSCR1-TFE3* in one  
168 patient with pRCC. For both patients with a detected *TFE3* fusion, the histopathological diagnosis  
169 had to be reconsidered. As a result, these patients were re-allocated in a different subcategory  
170 of RCC, i.e. MiT family translocation renal cell carcinomas<sup>1</sup>. The previously described *TERT*  
171 promoter hotspot variant (C228T)<sup>5</sup> was found in both ccRCC ( $N = 10$ ) and pRCC ( $N = 2$ ). Overall,  
172 characteristic clear cell driver gene events — such as somatic *VHL* mutations/deletions — were  
173 absent in nccRCC, except for *CDKN2A* deletions in pRCC.

174 In patients with ccRCC, both previously described and novel amplifications and deletions were  
175 detected. Statistically significant CNA peaks and arm-level copy-number alterations in ccRCC are  
176 presented in Supplementary figure 5. Previously described arm-level CNAs<sup>37</sup> included  
177 amplifications of 1q, 5q, 7q, 8q, 12p and 20q, and deletions in 3p, 9p and 14q. Furthermore, in  
178 the current cohort, amplifications of 5p, 7p, 12q, 16p and 20p, and deletions of 4p, 6p, 9q, 14p,



179 18p and 18q were also statistically significant. Next, we investigated if the tumors contained  
180 targetable variants (**Figure 4**), which showed that most patients with RCC had one or more  
181 variants indicated as potential targets or biomarkers for treatment. For example, for target-  
182 specific variants encoded by *CDK4/6* or *EGFR*, specific drugs have been developed for other  
183 cancer types<sup>38-40</sup>. This may result in off-label availability of these drugs for patients with similar  
184 aberrations in RCC, e.g. in context of a clinical trial<sup>41</sup>. Furthermore, somatic aberrations in cancer  
185 genes, e.g. *TP53*, are also considered biomarkers for targeted treatments<sup>42</sup>. Lastly, some variants  
186 leading to specific mechanisms were also considered as targetable for treatment. For instance,  
187 TKIs targeting VEGF signaling are known to be effective in patients with *VHL* mutations and are  
188 on-label available for patients with RCC<sup>43</sup>. Overall, for the majority (96%) of patients in this cohort  
189 actionable targets were detected, even for patients with nccRCC for whom no standard  
190 treatment is available to date.

### 191 **Transcriptome analyses of advanced RCC**

192 Differential Expression Analysis (DEA) was performed on RNA-Seq data to discriminate the two  
193 most frequently diagnosed histological subtypes, ccRCC ( $N = 24$ ) and pRCC ( $N = 4$ ). Next to the  $t$ -  
194 distributed stochastic neighbor embedding ( $t$ -SNE), which showed a clear separation between  
195 the two subtypes (Supplementary figure 6), the DEA resulted in 1,546 significantly (adjusted  $p$ -  
196 value  $< 0.05$ ) differentially expressed genes. The hundred genes with the smallest adjusted  $p$ -  
197 value are shown in **Figure 5A**. In this top hundred list, several genes are known to be associated  
198 with the development or course of RCC. For instance, *LOX*<sup>44</sup> and *MAPKAPK3*<sup>45</sup> correlate with  
199 poor survival in RCC. In addition, various other genes were differentially expressed and have been  
200 described in other malignancies, such as *TUSC2*<sup>46</sup>, *CAPN1*<sup>47</sup>, *PCSK6*<sup>48</sup>, and *CD2*<sup>49</sup>. The differential

201 expression of these genes confirmed a clear distinction of pRCC and ccRCC at the transcriptomic  
202 level.

203 Second, the pathway analysis (**Figure 5B**) of the significant differentially expressed genes  
204 revealed cancer hallmarks such as oxidative phosphorylation and epithelial-mesenchymal  
205 transition (EMT), among others <sup>50</sup>. Significant Reactome pathways <sup>51</sup> of differentially expressed  
206 genes in ccRCC compared to pRCC samples, mainly showed pathways related to VEGF and  
207 collagen formation. Pathways related to poor prognosis <sup>4</sup>, such as the AMPK complex, the Krebs  
208 cycle genes, the pentose phosphate pathway and fatty acid synthesis, were not found to be  
209 differentially expressed between ccRCC and pRCC. A heatmap of the top differentially expressed  
210 genes between ccRCC and pRCC and a *t*-SNE plot show that RCC samples of undefined subtype  
211 cluster with either ccRCC or pRCC samples based on the differential gene expression of these  
212 subtypes (Supplementary figure 7).

213 The 66 gene-signature has been based on previous data from the IMmotion150 trial <sup>25</sup>. High  
214 expression of 'angiogenic' genes and certain 'invasion' genes is applied to sub-classify RCC as  
215 'angiogenic', which would be predictive for response to TKIs targeting VEGF signaling. In case of  
216 high expression in 'Ca<sup>2+</sup>-Flux', 'T-Effector', and other 'invasion' genes, RCC is sub-classified as  
217 'immunogenic', indicating a response to ICIs is likely. According to this gene signature, ccRCC  
218 cases in the current cohort could be classified as either immunogenic or angiogenic (**Figure 5C**).  
219 Moreover, all patients with pRCC had low expression of these genes, except for one individual  
220 patient with expression in *EDNRB* <sup>52</sup>.

221

## 222 Discussion

223 In this study, the genomic and transcriptomic landscape of advanced RCC was characterized for  
224 91 individual patients. First, genomic data showed that, next to *VHL* mutations (73.6%), most  
225 common driver gene mutations in ccRCC included alterations in tumor suppressor genes of  
226 different pathways such as *SETD2* (88.9%) and *PTEN* (16.7%). While TMB was comparable  
227 amongst the different subtypes of RCC, the driver gene analyses showed a distinctive pattern  
228 between patients with ccRCC and nccRCC. Furthermore, WGS revealed potential actionable  
229 targets for 87 out of 91 patients and WGS might therefore contribute to a more individualized  
230 treatment strategy for patients with advanced RCC.

231 For a subgroup of patients ( $N = 28$ ), transcriptomic data were also available. RNA-Seq  
232 could be applied to distinguish ccRCC, pRCC and histologically undefined RCC based on the  
233 differential gene expression. The application of the 66-gene signature<sup>25</sup> on the RNA-Seq data,  
234 made it possible to sub-categorize ccRCC into immunogenic or angiogenic signatures, whereas  
235 classification in pRCC using these signatures was not feasible.

236

237 At genomic level, the findings for ccRCC corresponded mostly with previous findings<sup>4,5,53</sup>. The  
238 massive contribution of SBS40 to the mutational landscape of nearly all RCC subtypes in this  
239 cohort is remarkable. However, bootstrapping showed that SBS40 was the least robust signature,  
240 indicating that this signature could act as a sink for mutations that are difficult to fit. Since CPCT-  
241 02 cohorts with other tumor types did not show the high contribution of SBS40<sup>54,55</sup>, this is most  
242 certainly not a result of a bias in the sequencing or in our workflows. In contrast to other studies,  
243 the number of chromothriptic events was limited in this study and occurred in only five patients

244 with ccRCC. In previous studies, chromothripsis was defined as the combination of a  
245 chromothriptic event together with a translocation event with concurrent 3p loss and 5q gain,  
246 which were called “t(3;5) chromothripsis events”<sup>5</sup>. Although both chromothriptic and  
247 translocation (t(3;5)) events occurred in our cohort, for most of the cases these events were  
248 independent of each other (Supplementary figure 3 and 4).

249         At transcriptomic level, assigning ccRCC biopsies into either immunogenic or angiogenic  
250 signatures may indicate which treatment could be most beneficial for individual patients. The  
251 introduction of ICIs has significantly changed the therapeutic landscape for patients with  
252 advanced ccRCC<sup>56,57</sup>, resulting in a clinical need to select patients who will benefit either from  
253 angiogenic or immunogenic treatment<sup>17</sup>. These data could assist clinical decision making when  
254 choosing the optimal treatment strategy for the individual patient with advanced ccRCC. For  
255 patients with high expression of genes annotated as immunogenic, first–line treatment with ICIs  
256 should be considered, whereas for patients with high expression in angiogenic genes treatment  
257 with a TKI should be taken into consideration. For those patients with low expression throughout  
258 all these genes, combination treatment with TKI/ICI may be considered, although treatment  
259 based on actionable targets identified by WGS could be the most effective option. Treatment  
260 selection based on gene expression has already shown promising results for patients with RCC  
261<sup>12,58</sup>, however, further research in a prospective setting is still warranted<sup>59</sup>.

262

263 The distinctive mutational gene pattern between ccRCC and nccRCC clearly showed that these  
264 tumors are different entities, while differences within the nccRCC subtypes were also evident.  
265 For example, none of the patients with nccRCC had somatic *VHL* mutations and also other ccRCC

266 driver genes hardly showed mutations in nccRCC. This is of great importance, as the development  
267 of targeted drugs is based on driver mutations or consequences downstream. For instance, the  
268 frequently mutated *VHL* gene in ccRCC has been the basis for the development of angiogenesis  
269 inhibitors for this disease. The mutations in this tumor-suppressor gene result in the  
270 accumulation of *HIF1 $\alpha$ /2 $\alpha$* , eventually leading to overexpression of *VEGF/PDGF*, *AXL*, and *MET*,  
271 among others <sup>43,60</sup>. Several TKIs that have been approved for the treatment of advanced ccRCC  
272 <sup>6,7,43,61</sup> interfere at different levels in this cascade <sup>43,60</sup>. More recently, Hypoxia Inducible Factor  
273 (HIF) inhibition has also shown proven efficacy in patients with *VHL* mutations <sup>62</sup>. However, as  
274 patients with nccRCC in our cohort showed no mutations in *VHL* or other related pathways, it is  
275 questionable whether treatment directed against the *VHL* pathway would be the most effective  
276 therapy for this particular group of patients.

277

278 In clinical practice, RCC is usually defined histopathologically. As a result, there is a large  
279 dependency on experienced pathologists. However, discrepancies among these experts remain  
280 <sup>63,64</sup>. In our cohort, nearly 8% of RCC cases could not be sub-classified through histopathological  
281 assessment. Thereby, for two patients a fusion gene was detected by WGS which led to revision  
282 of the original histological diagnosis and allocation to a different subgroup, i.e. MiT family  
283 translocation renal cell carcinoma <sup>1</sup>. As the histopathological classification defines the treatment  
284 strategy, this could have significant clinical impact. Since different subtypes and growth patterns  
285 of RCC are driven by gene expression <sup>65</sup>, a next generation sequencing-based classifier could be  
286 feasible. Here, we showed that analyses of driver mutations (*VHL*, *PBRM1*, *SETD2*) and RNA-Seq  
287 data reveal clear differences among the different RCC subtypes. As shown in Supplementary

288 Figures 6 and 7, clustering of the undefined RCC subtypes is feasible and could be useful to clarify  
289 the histological subtype in clinical practice.

290

291 This study has some important limitations. First, the collected clinical data within the CPCT-02  
292 study were limited. For instance, only the first tumor response (according to RECIST v1.1.) after  
293 biopsy was available and the response rates in this cohort were relatively low when compared to  
294 the clinical trials. On one hand, these lower tumor response rates could be due to the  
295 unavailability of ICIs, as patients were included between 2016 and 2019, when ICIs were not yet  
296 available in first-line setting for RCC in the Netherlands. In addition, patients within the CPCT-02  
297 study were treated in a real-world setting, which is known for its lower response rates compared  
298 to response rates of clinical trials. In addition, due to the limited clinical data collection, it was  
299 not possible to reliably correlate genomic and transcriptomic findings to clinical data. A  
300 correlation with clinical data could have confirmed whether patients with certain gene signatures  
301 indeed had benefit from a specific treatment. Therefore, validation in a prospective trial is  
302 needed prior to clinical implementation.

303         Second, the limited number of patients with nccRCC made it challenging to run separate  
304 analyses for this group. Since the subgroup of patients with nccRCC consists of different less  
305 common and heterogeneous subtypes, and very little is known about the genomics of nccRCC.  
306 Therefore, we decided to include all patients with nccRCC, even subgroups containing only a  
307 single patient. Finally, the collected data were heterogeneous. For instance, not only biopsies of  
308 metastases, but also biopsies from the kidney (including primary tumors) were included for the  
309 analyses. However, it is not conceivable that this has significantly impacted the analysis, since

310 previous studies have shown clear consistencies between primary tumors and their metastasis <sup>5</sup>.  
311 In addition, the heterogeneity in this cohort reflects daily clinical practice of patients who present  
312 with advanced RCC, including primary metastatic disease. Despite this clinical heterogeneity, a  
313 clear genomic and transcriptomic signal could be extracted, indicating that the genomic and  
314 transcriptomic analyses are feasible for clinical implementation.

315

316 In conclusion, there are evident genomic and transcriptomic differences between RCC subtypes.  
317 The analysis of driver mutations, in combination with clustering of RNA-Seq data, could assist the  
318 histopathological subtyping of RCCs in clinical practice. In addition, RNA-Seq data could identify  
319 patients with ccRCC who may benefit more from treatment with either ICIs, TKIs or a combination  
320 of these drugs. Genomic and transcriptomic analyses are promising to identify actionable targets  
321 and to individualize treatment strategies in the majority of patients with RCC, even for patients  
322 with nccRCC. Although these results are promising, prospective clinical trials are still needed to  
323 evaluate whether genomic and transcriptomic diagnostics indeed contribute to improved  
324 survival outcomes in individual patients with advanced RCC.

325

## 326 **Materials and Methods**

### 327 **Center for Personalized Medicine: Patient cohort, study procedures, sample collection, clinical** 328 **data**

329 In accordance with the Declaration of Helsinki, all patients within this study provided written  
330 informed consent for participation in the Center for Personalized Cancer Treatment (CPCT-02)  
331 study (NCT01855477) before study procedures started. The CPCT-02 study was approved by the  
332 medical ethical committee of the University Medical Center Utrecht, as well as the Netherlands  
333 Cancer Institute and local approval was provided for each participating site. Details regarding  
334 inclusion criteria, the study protocol, sampling, and sequencing have been previously described  
335 <sup>27</sup>. In summary, core needle biopsies from the tumor lesion, peripheral whole blood samples and  
336 clinical data were collected across hospitals in the Netherlands. The response to treatment was  
337 determined according to RECIST v1.1 <sup>26</sup>. WGS data from 103 biopsies of 101 patients with  
338 advanced RCC were made available. Only one sample per patient was selected for the genomic  
339 analyses. When multiple biopsies of one patient were available, the sample covering the most  
340 clinical information and/or the sample with the highest estimated tumor cell percentage was  
341 selected. The selection resulted in 91 WGS samples (51 previously described by Priestley *et al.* <sup>27</sup>)  
342 and 35 RNA samples.

### 343 **Pathological diagnosis**

344 To confirm the histopathological diagnosis of RCC, pathology reports were requested via PALGA,  
345 the nationwide network and registry of histo- and cytopathology in the Netherlands <sup>66</sup>. Slides and  
346 tissue blocks were not available for pathological revision. Alternatively, the pathology reports  
347 were reviewed by a genito-urinary pathologist (GvL) to determine whether the microscopic



348 description and immunohistochemistry were compatible with the original diagnosis. The  
349 following subtypes were annotated: clear cell, papillary, chromophobe, tubulocystic, and  
350 collecting duct carcinoma. Histopathologically confirmed RCC of which the subtype remained  
351 unclear was categorized as undefined subtype.

### 352 **Whole genome sequencing and preprocessing**

353 Between the 8<sup>th</sup> of August 2016 and the 3<sup>rd</sup> of October 2019, tumor and whole-blood pairs were  
354 whole-genome sequenced at the Hartwig Medical Foundation (HMF) central sequencing center.  
355 A HiSeqX system was applied and 2 × 150 base read pairs were generated using standard settings  
356 (Illumina, San Diego, CA, USA). Preprocessing was performed as described by Priestley *et al* <sup>27</sup>.  
357 Briefly, read pair mapping was performed using BWA-mem <sup>67</sup> to the reference genome GRCh37  
358 (human) with subsequent systematic variant calling and several quality control and/or correction  
359 steps. The Genome Rearrangement IDentification Software Suite (GRIDSS) <sup>68</sup> was used for  
360 structural variant (SV) calling and LINX (v1.11) <sup>68</sup> for gene fusion event calling. Computational  
361 ploidy estimation and copy-number (CN) assessment was performed using the PURPLE (PURity &  
362 PLoidy Estimator) pipeline <sup>68</sup>, estimating tumor purity and CN profile by combining B-allele  
363 frequency (BAF), read depth, and SVs.

### 364 **Somatic variant annotation and filtering**

365 Somatic variants were determined using Strelka and provided by the HMF as part of the data  
366 request. Variant Call Format (VCF) files with somatic variants were annotated based on GRCh37  
367 with HUGO gene symbols, HGVS notations, gnomAD <sup>69</sup> frequencies using VEP <sup>70</sup> (database release  
368 95, merged cache), with setting "--per\_gene". Exclusively somatic single-nucleotide variants

369 (SNVs), small InDels, multi-nucleotide variants (MNVs) with  $\geq 3$  alternative read observations and  
370 passing variant caller quality control were included in the analyses. Furthermore, population  
371 variants were removed to prevent germline leakage, based on the gnomAD database (v2.0.2)<sup>69</sup>:  
372 gnomAD exome (ALL) allele frequency  $\geq 0.001$ ; and gnomAD genome (ALL)  $\geq 0.005$ . Variants  
373 specific for the Dutch CPCT cohort were removed based on a panel-of-normals from 1,762  
374 representative normal blood HMF samples. The most deleterious mutation was used to annotate  
375 the overlapping gene for each sample.

### 376 **Tumor Mutational Burden calculation**

377 The number of mutations per megabase pair was calculated as the amount of somatic genome-  
378 wide SNVs, MNVs, and InDels divided by the number of callable nucleotides in the human  
379 reference genome (GRCh37) FASTA file:

$$380 \quad TMB = \frac{(SNVs_g + MNVs_g + InDels_g)}{\left(\frac{2858674662}{10^6}\right)}$$

### 381 **Ploidy and copy-number analysis**

382 Broad and focal somatic CN alterations in ccRCC were identified by GISTIC2.0<sup>71</sup> (v2.0.23), using  
383 the following parameters: genegistic 1, gcm extreme, maxseg 4000, broad 1, brlen 0.98, conf  
384 0.95, rx 0, cap 3, saveseg 0, armpeel 1, smallmem 0, res 0.01, ta 0.1, td 0.1, savedata 0, savegene  
385 1, qvt 0.1. Distinction between shallow and deep CN events per region was based on thresholding  
386 performed by GISTIC2.0. The alterations were assigned a score taking both the amplitude and  
387 the frequency of its occurrence across samples into account (G-score). Thresholding was divided  
388 into five CN categories; two for deletions (-2 = deep, possibly homozygous loss, -1 = shallow,

389 possibly heterozygous loss), one for diploid (0 = diploid) and two for amplifications (1 = few  
390 additional copies, often broad gain, 2 = more copies, often focal gain). Annotation of GISTIC2.0  
391 peaks was performed as follows: A) Wide peaks were annotated with all overlapping canonical  
392 UCSC genes within the genomic limits of said peak. B) Focal peaks were annotated based on  
393 overlapping genomic coordinates, using custom R scripts and UCSC gene annotations.

#### 394 **Structural variant analysis**

395 SVs affecting genes were imported using custom R scripts, overlapping genes on at least one  
396 breakpoint, using GRCh37 genomic coordinates. SVs with an upstream or downstream Tumor  
397 Allele frequency (TAF) below 0.1 as determined by PURPLE and GRIDSS <sup>68</sup> were discarded along  
398 with SVs that affected all exons of a gene. In the case of both (multiple) mutations and/or SVs in  
399 the same gene, these were annotated as ‘multiple mutations’.

#### 400 **Fusion gene analysis**

401 WGS-based LINX TSV files were imported using R and overlapped with the three pillars of  
402 ChimerDB <sup>36</sup>; deep sequencing data (ChimerSeq), text mining of PubMed publications  
403 (ChimerPub), with extensive manual annotations (ChimerKB). Events that were not present in  
404 any pillar of ChimerDB and intra-gene fusions were filtered out. RNA-Seq based fusion genes  
405 detected with Isofox (<https://github.com/hartwigmedical/hmftools/tree/master/isofox>) were  
406 imported using R and overlapped with the fusion events detected in the DNA sequencing.

#### 407 **Somatic Driver Genes Analysis**

408 We utilized the dN/dS model (192 Poisson rate parameters; under the full trinucleotide model)  
409 to identify genes undergoing mutational selection in the ccRCC patients with the R package

410 dndscv<sup>72</sup> (v0.0.1.0). Both the substitution model and InDel model were used and were corrected  
411 for sequence composition, gene length and mutational signatures. These models test the ratio  
412 between nonsynonymous (missense, nonsense and essential splice site) and background  
413 (synonymous) mutations. To identify genes that drive selection, a  $q$ -value  $< 0.05$  (both including  
414 and excluding the InDel model) was used.

#### 415 **Mutational signatures analysis**

416 Mutational signatures analysis was performed using the MutationalPatterns R package (v3.2.0)<sup>73</sup>.  
417 The mutational signatures based on single base substitutions ( $N = 90$  v3 signatures) were  
418 downloaded from COSMIC<sup>74</sup>. SNVs were categorized according to their respective trinucleotide  
419 context (GRCh37) into a mutational spectrum matrix  $M_{ij}$  (where  $i$  represents 1:96 trinucleotide  
420 contexts and  $j$  represents the number of 1:91 samples) and subsequently, a constrained linear  
421 combination of the ninety mutational signatures was constructed per sample using non-negative  
422 least squares regression implemented in the R package pracma (v2.2.9). Mutational signatures  
423 were bootstrapped ( $N = 100$ ) with MutationalPatterns and argument 'method' set to "strict" to  
424 assess calling stability. Signature contribution for each sample was determined per 100  
425 samplings, per signature.

#### 426 **Chromothripsis**

427 Chromothripsis (CT), also known as chromosomal shattering, followed by seemingly random re-  
428 ligation, was detected using Shatterseek<sup>75</sup> (v0.4) with default settings. The following definition  
429 of CT was employed: (1)  $\geq 25$  intrachromosomal SVs involved in the event; (2)  $\geq 7$  oscillating CN  
430 segments (2 CN states) or  $\geq 14$  oscillating CN segments (3 CN states); (3) CT event involving  $\geq 20$

431 Mb; (4) satisfying the test of equal distribution of SV types ( $p$ -value  $> 0.05$ ); and (5) satisfying the  
432 test of nonrandom SV distribution within the cluster region or chromosome ( $p$ -value  $\leq 0.05$ ).

### 433 **Actionable targets**

434 iClusion (<https://iclusion.com>) data, which connects specific or gene-level aberrations to clinical  
435 cancer studies, were provided by HMF. This integrates clinical interpretations from Precision  
436 Oncology Knowledge Base (OncoKB) <sup>76</sup>, Clinical Interpretation of Variants in Cancer (CIViC) <sup>77</sup> and  
437 Cancer Genome Interpreter (CGI) <sup>78</sup>. All targets and biomarkers were overlapped with filtered  
438 molecular data to verify presence. Targets marked as “gene-level” were generalized for other  
439 variation in those genes, not listed in the iClusion data. The identified targets were assessed and  
440 manually categorized in the following three categories: on-label drugs for RCC, off-label available,  
441 investigational drugs. Drugs were considered on-label when approval was given for any subtype  
442 of RCC in the Netherlands. Whether drugs were on- or off-label available in the Netherlands is  
443 defined by the Dutch Medicines Evaluation Board (“College ter Beoordeling van  
444 Geneesmiddelen”) <sup>79</sup>. This evaluation board takes previous approvals by the U.S. Food and Drug  
445 Administration (FDA) and/or European Medicines Agency (EMA) in consideration.

### 446 **Germline analysis**

447 Known pathogenic germline variants (GRCh37) related to cancer and/or Von Hippel-Lindau  
448 syndrome were retrieved from ClinVar <sup>80</sup> that were less than 51 bp long, with a review status of  
449 “practice guideline”, “expert panel”, “multiple submitters” or “at least one star”. These ClinVar  
450 variants were used as filter for the import of germline variants from VCF files of our cohort.  
451 Variants with at least 2 reads and passing variant caller quality control were included.

452 Furthermore, variants that were annotated with “high” impact, in genes with known germline  
453 variation in RCC (*FH*, *SDHA*, *SDHB*, *SDHC*, *SDHD*, *TCEB1*, *FLCN*, *CHEK2*) were included.

#### 454 **RNA sequencing**

455 RNA was isolated from biopsy using the QIAasympyphony RNA Kit (Qiagen, Hilden, Germany) for  
456 tissue and quantified on the Qubit. Between 50 and 100 ng of RNA was used as input for the  
457 KAPA RNA HyperPrep Kit with RiboErase (Human/Mouse/Rat) library preparation (Roche) on an  
458 automated liquid handling platform (Beckman Coulter). RNA was fragmented (high temperature  
459 in the presence of magnesium) to a target length of 300 bp. Barcoded libraries were sequenced  
460 as pools on either a NextSeq 500 (V2.5 reagents) generating 2 x 75 base read pairs or on a  
461 NovaSeq 6000 generating 2 x 150 base read pairs using standard settings (Illumina, San Diego,  
462 CA, USA). BCL output from the sequencing platform was converted to FASTQ using Illumina’s  
463 bcl2fastq tool (versions 2.17 to 2.20) using default parameters. RNA-Seq data was aligned using  
464 STAR <sup>81</sup> to GRCh37 resulting in unsorted BAMs including chimeric reads as output. Gene and  
465 transcript counts were generated and used for subsequent fusion detection using Isofox  
466 (<https://github.com/hartwigmedical/hmftools/tree/master/isofox>).

#### 467 **RNA sequencing analyses**

468 Raw read counts were imported in R and filtered on protein coding genes based on Ensembl GTF  
469 file <sup>82</sup> (Homo sapiens GRCh37, version 87). *t*-distributed stochastic neighbor embedding (*t*-SNE)  
470 was performed on variance stabilized read counts (generated by DESeq2  
471 varianceStabilizingTransformation) of all protein coding genes. Differential expression analysis  
472 between ccRCC and pRCC was performed on raw read counts using DESeq2 <sup>83</sup> and the Wald-test.

473 Statistical significant results with Benjamini-Hochberg adjusted  $p$ -value  $< 0.05$  were further  
474 filtered to base mean  $> 100$  counts and absolute  $\log_2$  fold change  $\geq 1$ . The heatmap with the top  
475 most significantly differentially expressed genes (based on lowest adjusted  $p$ -value) was made  
476 using variance stabilized read counts and euclidean distances on scaled data. Gene signature  
477 heatmap was produced with centered Z-Scores with Euclidean distances. Gene set enrichment  
478 analyses were performed using fgsea<sup>84</sup> (Monte Carlo approach with Adaptive Multilevel Splitting)  
479 with MSigDB<sup>85</sup> Hallmarks and Reactome pathways<sup>51</sup> as gene sets. Reproduction of the D'Costa  
480 *et al.* gene signature<sup>25</sup> was done using 65 of 66 original genes, since *PECAM1* was on a genome  
481 patch not included in the RNA-Seq mapping supplied by HMF. Heatmaps were produced using  
482 pheatmap with Ward.D clustering.

#### 483 **Data and material availability**

484 Data was provided by HMF, which were used under data request number DR-088 for the current  
485 study. Both WGS, RNA-Seq and clinical data are freely available for academic use from the HMF  
486 through standardized procedures and request forms can be found at  
487 <https://www.hartwigmedicalfoundation.nl>. All tools and scripts used for processing of the WGS  
488 data are available at <https://github.com/hartwigmedical/> and/or can be provided by authors  
489 upon request.

490

491 **Tables**

492

493 **Table 1. Overview of patients' characteristics**

|                                            | <b>Frequency</b> | <b>Percentage</b> |
|--------------------------------------------|------------------|-------------------|
| <b>Sex</b>                                 |                  |                   |
| Male                                       | <b>72</b>        | <b>79%</b>        |
| Female                                     | <b>19</b>        | <b>21%</b>        |
| <b>Median age 65 years [range 40-83]</b>   | -----            | -----             |
| <b>Histological subtype</b>                |                  |                   |
| <b>Clear cell RCC (ccRCC)</b>              | <b>72</b>        | <b>79%</b>        |
| <b>Non-clear cell RCC (nccRCC)</b>         | <b>12</b>        | <b>13%</b>        |
| Papillary RCC (pRCC)                       | 9                | 75%               |
| Chromophobe RCC (chRCC)                    | 1                | 8%                |
| Collecting duct carcinoma (CDC)            | 1                | 8%                |
| Tubulocystic RCC (tRCC)                    | 1                | 8%                |
| <b>Undefined subtype</b>                   | <b>7</b>         | <b>8%</b>         |
| <b>Prior treatment (n=number of lines)</b> |                  |                   |
| No                                         | <b>71</b>        | <b>78%</b>        |
| Yes (1)                                    | <b>10</b>        | <b>11%</b>        |
| Yes (≥2)                                   | <b>10</b>        | <b>11%</b>        |
| <b>Treatment after biopsy (N = 84)</b>     |                  |                   |
| <b>Tyrosine kinase inhibitors (TKIs)</b>   | <b>61</b>        | <b>73%</b>        |
| Pazopanib                                  | 36               | 59%               |
| Sunitinib                                  | 23               | 38%               |
| Cabozantinib                               | 1                | 1.6%              |
| Lenvatinib                                 | 1                | 1.6%              |
| <b>Immune checkpoint inhibitors (ICIs)</b> | <b>19</b>        | <b>23%</b>        |
| Nivolumab monotherapy                      | 13               | 68%               |
| Nivolumab + ipilimumab                     | 6                | 32%               |
| <b>Combination treatment</b>               | <b>4</b>         | <b>5%</b>         |
| Avelumab + axitinib                        | 4                | 100%              |

494

495



## 496 **Figure legends**

### 497 **Figure 1 Overview of sample selection and biopsy sites**

498 **1A** illustrates the selection of samples for both the WGS ( $N = 91$ ) and matched RNA-Seq ( $N = 28$ )  
499 analyses. In **1B**, the main biopsy sites are shown. Next to the illustrated biopsy sites, other biopsy  
500 sites ( $N = 20$ ) include for instance biopsies from subcutaneous tissue. **1B** was created with  
501 biorender.

### 502 **Figure 2 Overview of genomic characteristics of whole-genome sequenced advanced RCC** 503 **cohort ( $N = 91$ )**

504 Track **A** shows the tumor mutational burden (mutations per Mb; yellow for low (0-5), orange for  
505 medium (5-10) and red for high (> 10)). Track **B** shows the mean genome-wide ploidy, with white  
506 representing diploidy. Tracks **C** and **D** illustrate the abundance of structural variants and the  
507 relative frequency of the types of these variants. Tracks **E** and **F** show the relative mutational  
508 signature contribution (COSMIC signatures v3) and the relative frequency of mutational changes  
509 at base level. Track **G** shows the presence of chromothripsis. Track **H** shows whether patients  
510 were treatment naive at time of biopsy. Tracks **I** and **J** indicate the first treatment given after  
511 biopsy (if any) and the first tumor response according to RECIST v1.1, respectively. On the x-axis  
512 the figure is arranged in descending order by tumor mutational burden per RCC subtype. ccRCC  
513 = clear cell renal cell carcinoma. pRCC = papillary renal cell carcinoma. Undefined subtype = renal  
514 cell carcinoma, with undefined subtype. chRCC = chromophobe renal cell carcinoma. CDC =  
515 collecting duct carcinoma. tRCC = tubulocystic renal cell carcinoma. NA = not available.

### 516 **Figure 3 Overview of coding mutations and copy-number alterations in driver genes in whole-** 517 **genome sequenced advanced renal cell carcinoma cohort ( $N = 91$ )**

518 The oncoplot in track **A** shows mutations (filled center) and copy-number alterations (grid cell  
519 background) of driver genes determined by dN/dS and GISTIC2.0. Track **B** also shows an oncoplot,  
520 but on selected genes, not passing any statistical threshold. Germline pathogenic mutations are  
521 indicated with a capital letter 'G' (and red border), utilizing the same color coding as the somatic  
522 mutations. Consequential fusion genes are indicated in yellow, with a red border. Track **C** shows  
523 the tumor mutational burden (mutations per Mb; yellow for low (0-5), orange for medium (5-10)

524 and red for high (> 10)). Tracks **D**, **E** and **F** show whether patients were treatment naive at time of  
525 biopsy, if systemic treatment was given after time of biopsy, and the first tumor response after  
526 systemic treatment according to RECIST v1.1, respectively. Bold sample names with asterisks  
527 indicate MiT family translocation RCC. Figure is arranged in descending order by tumor mutational  
528 burden per RCC subtype on the x-axis.

529 **Figure 4 Overview of DNA-based biomarkers and potential treatment options in the whole-**  
530 **genome sequenced advanced renal cell carcinoma cohort (N = 91)**

531 Track **A** Percentage of potential available treatment options based on genomic characteristics.  
532 Treatment options are categorized according to the highest level of drug availability in clinical  
533 practice (on label available – off label available – investigational drugs). Track **B** Potentially  
534 actionable alterations at gene-level with each column representing a sample, ordered  
535 descendingly by tumor mutational burden per subtype on the x-axis. Detailed description of  
536 actionable targets can be found in Supplementary Data file 1.

537 **Figure 5 RNA sequencing cohort and differential expression analysis between clear cell renal**  
538 **cell carcinoma (ccRCC) and papillary RCC (pRCC) with classification according to gene**  
539 **signatures<sup>25</sup>**

540 Track **A** shows a heatmap of Z-scores of variance stabilized values with unsupervised clustering of  
541 the top 100 transcripts based on smallest adjusted *p*-value and colored according to Z-scores.  
542 Tracks **B** shows gene set enrichments based on sets (y-axis) from the molecular signatures  
543 database hallmarks and Reactome pathways, with the normalized enrichment score (NES) on the  
544 x-axis. Bar charts are visualized with ccRCC taken as reference (N = 24) (positive NES equals  
545 expression up in ccRCC and down in pRCC (N = 4)). Track **C** shows unsupervised clustering on the  
546 rows (patients) with color coding indicating the RCC subtype (purple for ccRCC and pink for pRCC)  
547 and colored according to Z-scores. The x-axis has been cut into several gene groups related to  
548 angiogenesis, invasion, Ca<sup>2+</sup>-flux and T-effector cells, as defined by D'Costa *et al.* <sup>25</sup> and by their  
549 stated order.

550  
551

## 552 **Acknowledgements**

553 This publication and the underlying study have been made possible partly on the basis of the  
554 data that Hartwig Medical Foundation and the Center of Personalized Cancer Treatment (CPCT)  
555 have made available to the study. Furthermore, we would like to thank the nationwide network  
556 and registry of histo- and cytopathology in the Netherlands (PALGA) for their assistance on  
557 retrieving and storing the pathological records of the included patients with RCC. Figure 1 was  
558 created with BioRender (<https://biorender.com/>).

## 559 **Author contributions**

560 K.J., W.S.G., H.J.G.W. and A.A.M.V. wrote the manuscript which all authors have reviewed  
561 critically. W.S.G. and H.J.G.W. performed the bioinformatical analyses. K.J. and A.A.M.V. assessed  
562 the clinical data. G.J.L.H.L. reviewed and assessed the histopathological data. P.H., H.M.W., A.B.,  
563 S.F.O, J.M.R., L.V.B., M.L. and R.H.J.M. are clinical contributors. M.P.L. and S.S. participated in the  
564 board of the CPCT-02 study. E.C. coordinated the sequencing of samples and contributed to the  
565 bioinformatical analyses.

566

## 567 **Conflicts of interest**

568 P.H. declares consultancy roles for Astellas, MSD, Ipsen, Pfizer, AstraZeneca, and Bristol-Myers  
569 Squibb, all outside the submitted work; H.M.W. declares honoraria from Roche and Astellas and  
570 travel expenses from Ipsen and Astellas, all outside the submitted work; S.F.O declares research  
571 grants from Novartis, Pfizer and Celldex Therapeutics and advisory board for Bristol Myers Squibb  
572 (all paid to the institution); M.L. declares speakers fee of BMS and advisory board of MSD, both  
573 paid to institution; R.H.J.M. declares speakers fee from Novartis and advisory role for Servier,  
574 patency from Pamgene, and investigator-initiated research (paid to institution) from Astellas,  
575 Bayer, Boehringer-Ingelheim, Cristal Therapeutics, Pamgene, Pfizer, Novartis, Roche, Sanofi,  
576 Servier, all outside the submitted work; M.P.L. declares advisory board for Amgen, Astellas, Astra  
577 Zeneca, Bayer, INCa, Janssen Cilag BV, MSD, Novartis, Pfizer, Roche, Sanofi, Servier, consulting  
578 role for Julius Clinical and Research Grants (paid to institution) from Astellas, Janssen, MSD,  
579 Sanofi, all outside the submitted work; H.J.G.W. declares speakers honoraria from Bayer,

580 Depository receipts for shares from Cergentis B.V. all outside the submitted work; A.A.M.V.  
581 reports advisory board (all paid to institution) of BMS, MSD, Merck, Pfizer, Ipsen, Eisai, Pierre  
582 Fabre, Roche, Novartis, Sanofi, all outside the submitted work. All other authors declare no  
583 competing interests.

## 584 References

- 585 1. Moch, H., Cubilla, A.L., Humphrey, P.A., Reuter, V.E. & Ulbright, T.M. The 2016 WHO  
586 Classification of Tumours of the Urinary System and Male Genital Organs-Part A: Renal, Penile,  
587 and Testicular Tumours. *Eur Urol* **70**, 93-105 (2016).
- 588 2. Cancer Genome Atlas Research, N. *et al.* Comprehensive Molecular Characterization of Papillary  
589 Renal-Cell Carcinoma. *N Engl J Med* **374**, 135-45 (2016).
- 590 3. Padala, S.A. *et al.* Epidemiology of Renal Cell Carcinoma. *World J Oncol* **11**, 79-87 (2020).
- 591 4. Cancer Genome Atlas Research, N. Comprehensive molecular characterization of clear cell renal  
592 cell carcinoma. *Nature* **499**, 43-9 (2013).
- 593 5. Mitchell, T.J. *et al.* Timing the Landmark Events in the Evolution of Clear Cell Renal Cell Cancer:  
594 TRACERx Renal. *Cell* **173**, 611-623 e17 (2018).
- 595 6. Motzer, R.J. *et al.* Sunitinib versus interferon alfa in metastatic renal-cell carcinoma. *N Engl J*  
596 *Med* **356**, 115-24 (2007).
- 597 7. Mendez-Vidal, M.J. *et al.* Pazopanib: Evidence review and clinical practice in the management of  
598 advanced renal cell carcinoma. *BMC Pharmacol Toxicol* **19**, 77 (2018).
- 599 8. Motzer, R.J. *et al.* Nivolumab versus Everolimus in Advanced Renal-Cell Carcinoma. *N Engl J Med*  
600 **373**, 1803-13 (2015).
- 601 9. Motzer, R.J. *et al.* Nivolumab plus ipilimumab versus sunitinib in first-line treatment for  
602 advanced renal cell carcinoma: extended follow-up of efficacy and safety results from a  
603 randomised, controlled, phase 3 trial. *Lancet Oncol* (2019).
- 604 10. Motzer, R.J. *et al.* Efficacy of everolimus in advanced renal cell carcinoma: a double-blind,  
605 randomised, placebo-controlled phase III trial. *Lancet* **372**, 449-56 (2008).
- 606 11. Powles, T. *et al.* Pembrolizumab plus axitinib versus sunitinib monotherapy as first-line  
607 treatment of advanced renal cell carcinoma (KEYNOTE-426): extended follow-up from a  
608 randomised, open-label, phase 3 trial. *Lancet Oncol* **21**, 1563-1573 (2020).
- 609 12. Choueiri, T.K. *et al.* Updated efficacy results from the JAVELIN Renal 101 trial: first-line avelumab  
610 plus axitinib versus sunitinib in patients with advanced renal cell carcinoma. *Ann Oncol* **31**, 1030-  
611 1039 (2020).
- 612 13. Rini, B.I. *et al.* Atezolizumab plus bevacizumab versus sunitinib in patients with previously  
613 untreated metastatic renal cell carcinoma (IMmotion151): a multicentre, open-label, phase 3,  
614 randomised controlled trial. *Lancet* **393**, 2404-2415 (2019).
- 615 14. Flippot, R., Escudier, B. & Albiges, L. Immune Checkpoint Inhibitors: Toward New Paradigms in  
616 Renal Cell Carcinoma. *Drugs* **78**, 1443-1457 (2018).
- 617 15. Heng, D.Y. *et al.* External validation and comparison with other models of the International  
618 Metastatic Renal-Cell Carcinoma Database Consortium prognostic model: a population-based  
619 study. *Lancet Oncol* **14**, 141-8 (2013).
- 620 16. Guida, A. *et al.* Identification of international metastatic renal cell carcinoma database  
621 consortium (IMDC) intermediate-risk subgroups in patients with metastatic clear-cell renal cell  
622 carcinoma. *Oncotarget* **11**, 4582-4592 (2020).
- 623 17. Vano, Y.A. *et al.* First-Line Treatment of Metastatic Clear Cell Renal Cell Carcinoma: What Are  
624 the Most Appropriate Combination Therapies? *Cancers (Basel)* **13**(2021).
- 625 18. Truong, L.D. & Shen, S.S. Immunohistochemical diagnosis of renal neoplasms. *Arch Pathol Lab*  
626 *Med* **135**, 92-109 (2011).
- 627 19. Hong, B. *et al.* The Clinicopathological Features and Prognosis in Patients With Papillary Renal  
628 Cell Carcinoma: A Multicenter Retrospective Study in Chinese Population. *Front Oncol* **11**,  
629 753690 (2021).

- 630 20. Sepe, P. *et al.* Characteristics and Treatment Challenges of Non-Clear Cell Renal Cell Carcinoma.  
631 *Cancers (Basel)* **13**(2021).
- 632 21. Powles, T. *et al.* ESMO Clinical Practice Guideline update on the use of immunotherapy in early  
633 stage and advanced renal cell carcinoma. *Annals of Oncology* **32**, 1511-1519 (2021).
- 634 22. Osterman, C.K. & Rose, T.L. A Systematic Review of Systemic Treatment Options for Advanced  
635 Non-Clear Cell Renal Cell Carcinoma. *Kidney Cancer* **4**, 15-27 (2020).
- 636 23. Turajlic, S. *et al.* Tracking Cancer Evolution Reveals Constrained Routes to Metastases: TRACERx  
637 Renal. *Cell* **173**, 581-594 e12 (2018).
- 638 24. Ricketts, C.J. *et al.* The Cancer Genome Atlas Comprehensive Molecular Characterization of  
639 Renal Cell Carcinoma. *Cell Rep* **23**, 313-326 e5 (2018).
- 640 25. D'Costa, N.M. *et al.* Identification of gene signature for treatment response to guide precision  
641 oncology in clear-cell renal cell carcinoma. *Sci Rep* **10**, 2026 (2020).
- 642 26. Eisenhauer, E.A. *et al.* New response evaluation criteria in solid tumours: revised RECIST  
643 guideline (version 1.1). *Eur J Cancer* **45**, 228-47 (2009).
- 644 27. Priestley, P. *et al.* Pan-cancer whole-genome analyses of metastatic solid tumours. *Nature* **575**,  
645 210-216 (2019).
- 646 28. Alexandrov, L.B. *et al.* Signatures of mutational processes in human cancer. *Nature* **500**, 415-21  
647 (2013).
- 648 29. Abou-Rebyeh, H., Borgmann, V., Nagel, R. & Al-Abadi, H. DNA ploidy is a valuable predictor for  
649 prognosis of patients with resected renal cell carcinoma. *Cancer* **92**, 2280-5 (2001).
- 650 30. Ortiz, B., White, J.R., Wu, W.H. & Chan, T.A. Deletion of Ptpd and Cdkn2a cooperate to  
651 accelerate tumorigenesis. *Oncotarget* **5**, 6976-82 (2014).
- 652 31. Du, Y. *et al.* Polymorphism in protein tyrosine phosphatase receptor delta is associated with the  
653 risk of clear cell renal cell carcinoma. *Gene* **512**, 64-9 (2013).
- 654 32. Tadesse, S., Yu, M., Kumarasiri, M., Le, B.T. & Wang, S. Targeting CDK6 in cancer: State of the art  
655 and new insights. *Cell Cycle* **14**, 3220-30 (2015).
- 656 33. Li, Y., Shen, Y., Zhu, Z., Wen, H. & Feng, C. Comprehensive analysis of copy number variance and  
657 sensitivity to common targeted therapy in clear cell renal cell carcinoma: In silico analysis with in  
658 vitro validation. *Cancer Med* **9**, 6020-6029 (2020).
- 659 34. Braun, D.A. *et al.* Interplay of somatic alterations and immune infiltration modulates response to  
660 PD-1 blockade in advanced clear cell renal cell carcinoma. *Nat Med* **26**, 909-918 (2020).
- 661 35. Turajlic, S., Larkin, J. & Swanton, C. SnapShot: Renal Cell Carcinoma. *Cell* **163**, 1556-1556 e1  
662 (2015).
- 663 36. Jang, Y.E. *et al.* ChimerDB 4.0: an updated and expanded database of fusion genes. *Nucleic Acids*  
664 *Research* **48**, D817-D824 (2019).
- 665 37. Beroukhi, R. *et al.* Patterns of gene expression and copy-number alterations in von-hippel  
666 lindau disease-associated and sporadic clear cell carcinoma of the kidney. *Cancer Res* **69**, 4674-  
667 81 (2009).
- 668 38. Du, Z. *et al.* Structure-function analysis of oncogenic EGFR Kinase Domain Duplication reveals  
669 insights into activation and a potential approach for therapeutic targeting. *Nat Commun* **12**,  
670 1382 (2021).
- 671 39. Ho, G.F. *et al.* Real-world experience of first-line afatinib in patients with EGFR-mutant advanced  
672 NSCLC: a multicenter observational study. *BMC Cancer* **19**, 896 (2019).
- 673 40. Braal, C.L. *et al.* Inhibiting CDK4/6 in Breast Cancer with Palbociclib, Ribociclib, and Abemaciclib:  
674 Similarities and Differences. *Drugs* **81**, 317-331 (2021).
- 675 41. van der Velden, D.L. *et al.* The Drug Rediscovery protocol facilitates the expanded use of existing  
676 anticancer drugs. *Nature* **574**, 127-131 (2019).

- 677 42. Zhu, G. *et al.* Mutant p53 in Cancer Progression and Targeted Therapies. *Front Oncol* **10**, 595187  
678 (2020).
- 679 43. Alonso-Gordoa, T. *et al.* Targeting Tyrosine kinases in Renal Cell Carcinoma: "New Bullets against  
680 Old Guys". *Int J Mol Sci* **20**(2019).
- 681 44. Lin, S. *et al.* Comprehensive analysis on the expression levels and prognostic values of LOX  
682 family genes in kidney renal clear cell carcinoma. *Cancer Med* **9**, 8624-8638 (2020).
- 683 45. Oh, E. *et al.* Genome-Wide Transcriptomic Analysis of Non-Tumorigenic Tissues Reveals Aging-  
684 Related Prognostic Markers and Drug Targets in Renal Cell Carcinoma. *Cancers (Basel)* **13**(2021).
- 685 46. Rimkus, T., Sirkisoon, S., Harrison, A. & Lo, H.W. Tumor suppressor candidate 2 (TUSC2, FUS-1)  
686 and human cancers. *Discov Med* **23**, 325-330 (2017).
- 687 47. Pan, X.Q., Huang, W., Jin, L.W., Lin, H.Z. & Xu, X.Y. A Novel Pyroptosis-Related Prognostic  
688 Signature for Risk Stratification and Clinical Prognosis in Clear Cell Renal Cell Carcinoma. *Dis*  
689 *Markers* **2022**, 8093837 (2022).
- 690 48. Wang, P., Wang, F., Wang, L. & Pan, J. Proprotein convertase subtilisin/kexin type 6 activates the  
691 extracellular signal-regulated kinase 1/2 and Wnt family member 3A pathways and promotes in  
692 vitro proliferation, migration and invasion of breast cancer MDA-MB-231 cells. *Oncol Lett* **16**,  
693 145-150 (2018).
- 694 49. Han, J. *et al.* MMP11 and CD2 as novel prognostic factors in hormone receptor-negative, HER2-  
695 positive breast cancer. *Breast Cancer Res Treat* **164**, 41-56 (2017).
- 696 50. Ding, X.F., Zhou, J., Hu, Q.Y., Liu, S.C. & Chen, G. The tumor suppressor pVHL down-regulates  
697 never-in-mitosis A-related kinase 8 via hypoxia-inducible factors to maintain cilia in human renal  
698 cancer cells. *J Biol Chem* **290**, 1389-94 (2015).
- 699 51. Jassal, B. *et al.* The reactome pathway knowledgebase. *Nucleic Acids Res* **48**, D498-D503 (2020).
- 700 52. Wuttig, D. *et al.* CD31, EDNRB and TSPAN7 are promising prognostic markers in clear-cell renal  
701 cell carcinoma revealed by genome-wide expression analyses of primary tumors and  
702 metastases. *Int J Cancer* **131**, E693-704 (2012).
- 703 53. Carlo, M.I. *et al.* Prevalence of Germline Mutations in Cancer Susceptibility Genes in Patients  
704 With Advanced Renal Cell Carcinoma. *JAMA Oncol* **4**, 1228-1235 (2018).
- 705 54. van Riet, J. *et al.* The genomic landscape of 85 advanced neuroendocrine neoplasms reveals  
706 subtype-heterogeneity and potential therapeutic targets. *Nat Commun* **12**, 4612 (2021).
- 707 55. Angus, L. *et al.* The genomic landscape of metastatic breast cancer highlights changes in  
708 mutation and signature frequencies. *Nat Genet* **51**, 1450-1458 (2019).
- 709 56. Motzer, R.J. *et al.* Nivolumab plus Ipilimumab versus Sunitinib in Advanced Renal-Cell  
710 Carcinoma. *N Engl J Med* **378**, 1277-1290 (2018).
- 711 57. Motzer, R.J. *et al.* Survival outcomes and independent response assessment with nivolumab plus  
712 ipilimumab versus sunitinib in patients with advanced renal cell carcinoma: 42-month follow-up  
713 of a randomized phase 3 clinical trial. *J Immunother Cancer* **8**(2020).
- 714 58. Motzer, R.J. *et al.* Final Overall Survival and Molecular Analysis in IMmotion151, a Phase 3 Trial  
715 Comparing Atezolizumab Plus Bevacizumab vs Sunitinib in Patients With Previously Untreated  
716 Metastatic Renal Cell Carcinoma. *JAMA Oncol* (2021).
- 717 59. Epailard, N. *et al.* BIONIKK: A phase 2 biomarker driven trial with nivolumab and ipilimumab or  
718 VEGFR tyrosine kinase inhibitor (TKI) in naive metastatic kidney cancer. *Bull Cancer* **107**, eS22-  
719 eS27 (2020).
- 720 60. Choueiri, T.K. & Kaelin, W.G., Jr. Targeting the HIF2-VEGF axis in renal cell carcinoma. *Nat Med*  
721 **26**, 1519-1530 (2020).
- 722 61. van der Veldt, A.A. *et al.* Sunitinib for treatment of advanced renal cell cancer: primary tumor  
723 response. *Clin Cancer Res* **14**, 2431-6 (2008).

- 724 62. Jonasch, E. *et al.* Belzutifan for Renal Cell Carcinoma in von Hippel-Lindau Disease. *N Engl J Med*  
725 **385**, 2036-2046 (2021).
- 726 63. Nyk, L. *et al.* Interobserver Variability in Assessment of Renal Mass Biopsies. *Urol J* **18**, 400-403  
727 (2020).
- 728 64. Haas, M. Donor kidney biopsies: pathology matters, and so does the pathologist. *Kidney Int* **85**,  
729 1016-9 (2014).
- 730 65. Osunkoya, A.O., Young, A.N., Wang, W., Netto, G.J. & Epstein, J.I. Comparison of gene  
731 expression profiles in tubulocystic carcinoma and collecting duct carcinoma of the kidney. *Am J*  
732 *Surg Pathol* **33**, 1103-6 (2009).
- 733 66. Casparie, M. *et al.* Pathology databanking and biobanking in The Netherlands, a central role for  
734 PALGA, the nationwide histopathology and cytopathology data network and archive. *Cell Oncol*  
735 **29**, 19-24 (2007).
- 736 67. Vasimuddin, M., Misra, S., Li, H. & Aluru, S. Efficient Architecture-Aware Acceleration of BWA-  
737 MEM for Multicore Systems,. *2019 IEEE International Parallel and Distributed Processing*  
738 *Symposium (IPDPS)* 314-324 (2019).
- 739 68. Cameron, D.L. *et al.* GRIDSS, PURPLE, LINX: Unscrambling the tumor genome via integrated  
740 analysis of structural variation and copy number. *bioRxiv*, 781013 (2019).
- 741 69. Karczewski, K.J. *et al.* The mutational constraint spectrum quantified from variation in 141,456  
742 humans. *Nature* **581**, 434-443 (2020).
- 743 70. McLaren, W. *et al.* The Ensembl Variant Effect Predictor. *Genome Biology* **17**, 122 (2016).
- 744 71. Mermel, C.H. *et al.* GISTIC2.0 facilitates sensitive and confident localization of the targets of  
745 focal somatic copy-number alteration in human cancers. *Genome Biology* **12**, R41 (2011).
- 746 72. Martincorena, I. *et al.* Universal Patterns of Selection in Cancer and Somatic Tissues. *Cell* **171**,  
747 1029-1041 e21 (2017).
- 748 73. Blokzijl, F., Janssen, R., van Boxtel, R. & Cuppen, E. MutationalPatterns: comprehensive genome-  
749 wide analysis of mutational processes. *Genome Medicine* **10**, 33 (2018).
- 750 74. Alexandrov, L.B. *et al.* The repertoire of mutational signatures in human cancer. *Nature* **578**, 94-  
751 101 (2020).
- 752 75. Cortés-Ciriano, I. *et al.* Comprehensive analysis of chromothripsis in 2,658 human cancers using  
753 whole-genome sequencing. *Nature Genetics* **52**, 331-341 (2020).
- 754 76. Debyani, C. *et al.* OncoKB: A Precision Oncology Knowledge Base. *JCO Precision Oncology*, 1-16  
755 (2017).
- 756 77. Griffith, M. *et al.* CIViC is a community knowledgebase for expert crowdsourcing the clinical  
757 interpretation of variants in cancer. *Nature Genetics* **49**, 170-174 (2017).
- 758 78. Tamborero, D. *et al.* Cancer Genome Interpreter annotates the biological and clinical relevance  
759 of tumor alterations. *Genome Medicine* **10**, 25 (2018).
- 760 79. College ter Beoordeling van Geneesmiddelen. <https://www.cbg-meb.nl/>.
- 761 80. Landrum, M.J. *et al.* ClinVar: improvements to accessing data. *Nucleic Acids Research* **48**, D835-  
762 D844 (2019).
- 763 81. Dobin, A. *et al.* STAR: ultrafast universal RNA-seq aligner. *Bioinformatics* **29**, 15-21 (2012).
- 764 82. Yates, A.D. *et al.* Ensembl 2020. *Nucleic Acids Research* **48**, D682-D688 (2019).
- 765 83. Love, M.I., Huber, W. & Anders, S. Moderated estimation of fold change and dispersion for RNA-  
766 seq data with DESeq2. *Genome Biology* **15**, 550 (2014).
- 767 84. Korotkevich, G. *et al.* Fast gene set enrichment analysis. *bioRxiv*, 060012 (2021).
- 768 85. Liberzon, A. *et al.* The Molecular Signatures Database (MSigDB) hallmark gene set collection. *Cell*  
769 *Syst* **1**, 417-425 (2015).



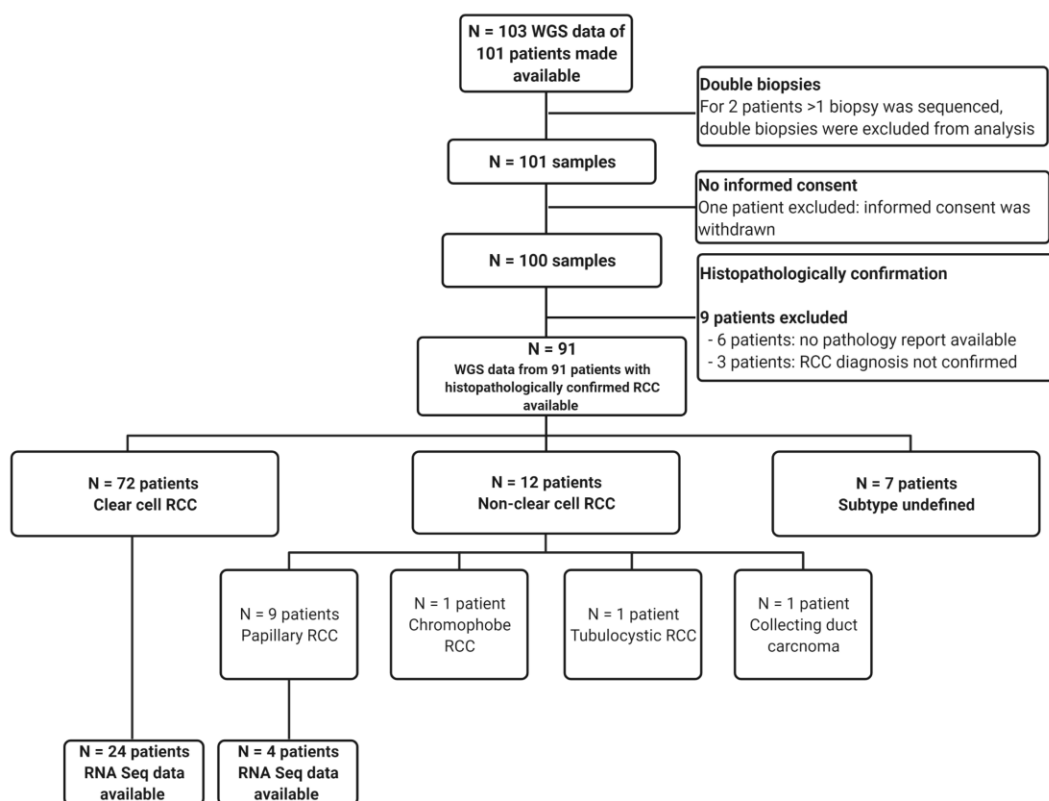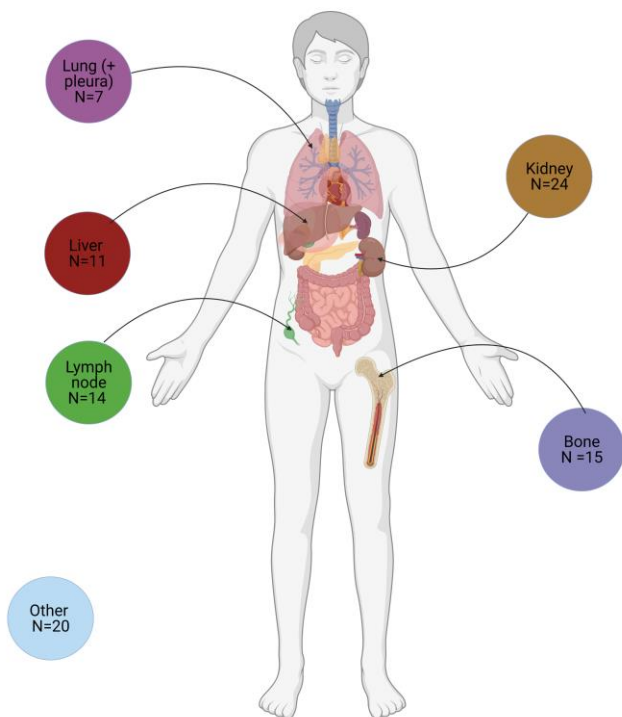

A

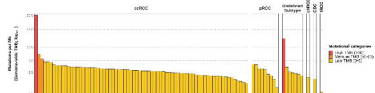

B

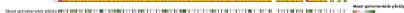

C

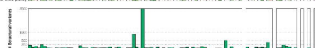

D

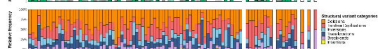

E

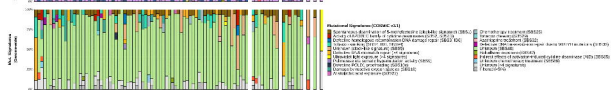

F

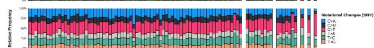

G

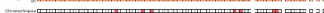

H

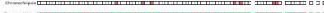



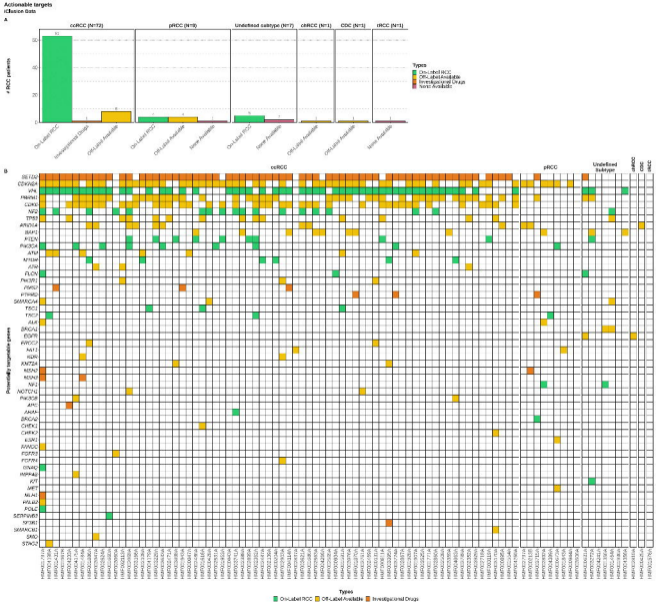

A

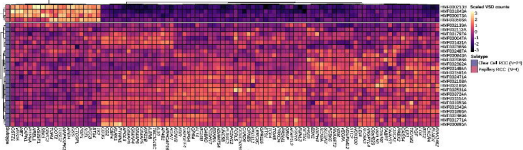

B

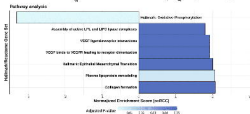

C

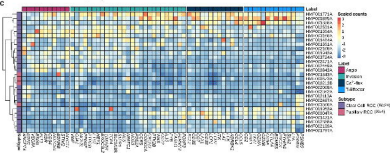

Source: https://www.biorxiv.org/content/10.1101/2022.04.22.488773v1.full.pdf
