## 1 The genomic and transcriptomic landscape of advanced renal cell cancer for 2 individualized treatment strategies

3 K. de Joode<sup>¥1</sup>, W.S. van de Geer<sup>¥1,2</sup>, G.J.L.H. van Leenders<sup>3</sup>, P. Hamberg<sup>4</sup>, H.M. Westgeest<sup>5</sup>, A. Beeker<sup>6</sup>, S.F.  
4 Oosting<sup>7</sup>, J.M. van Rooijen<sup>8</sup>, L.V. Beerepoot<sup>9</sup>, M. Labots<sup>10</sup>, R.H.J. Mathijssen<sup>1</sup>, M.P. Lolkema<sup>1,11</sup>, E.  
5 Cuppen<sup>12,13</sup>, S. Sleijfer<sup>1,11</sup>, H.J.G. van de Werken<sup>¥\*2,14,15</sup>, A.A.M. van der Veldt<sup>¥\*1,16</sup>

6 *¥Both authors contributed equally and are considered first author*

7 *\*Both authors contributed equally and are considered last author*

8 *\*Corresponding author*

9 <sup>1</sup>Department of Medical Oncology, Erasmus MC Cancer Institute, University Medical Center, Rotterdam,  
10 The Netherlands;

11 <sup>2</sup>Cancer Computational Biology Center, Erasmus MC Cancer Institute, University Medical Center,  
12 Rotterdam, The Netherlands;

13 <sup>3</sup>Department of Pathology, Erasmus MC, Rotterdam, the Netherlands;

14 <sup>4</sup>Department of Internal Medicine, Franciscus Gasthuis & Vlietland, Rotterdam, The Netherlands;

15 <sup>5</sup>Department of Internal Medicine, Amphia Hospital, Breda, The Netherlands;

16 <sup>6</sup>Department of Internal Medicine, Spaarne Gasthuis, Hoofddorp, The Netherlands;

17 <sup>7</sup>Department of Medical Oncology, University Medical Center Groningen, University of Groningen,  
18 Groningen, The Netherlands;

19 <sup>8</sup>Department of Internal Medicine, Martini Hospital, Groningen, The Netherlands;

20 <sup>9</sup>Department of Internal Medicine, Elisabeth-Tweesteden hospital, Tilburg, The Netherlands;

21 <sup>10</sup>Department of Medical Oncology, Amsterdam UMC, Vrije Universiteit Amsterdam, Department of  
22 Medical Oncology, Cancer Center Amsterdam, The Netherlands;

23 <sup>11</sup>Center for Personalized Cancer Treatment, Rotterdam, The Netherlands;

24 <sup>12</sup>Center for Molecular Medicine and Oncode Institute, University Medical Center Utrecht, Utrecht, The  
25 Netherlands;

26 <sup>13</sup>Hartwig Medical Foundation, Amsterdam, The Netherlands;

27 <sup>14</sup>Department of Urology, Erasmus MC Cancer Institute, University Medical Center, Rotterdam, The  
28 Netherlands;

29 <sup>15</sup>Department of Immunology, Erasmus MC Cancer Institute, University Medical Center, Rotterdam, The  
30 Netherlands;

31 <sup>16</sup>Departments of Radiology & Nuclear Medicine, Erasmus MC, Rotterdam, The Netherlands

32 *\*Corresponding author(s)*

33 Astrid A.M. van der Veldt, Departments of Medical Oncology and Radiology & Nuclear Medicine,  
34 Erasmus MC Cancer Institute, Dr. Molewaterplein 40, 3015 GD Rotterdam, The Netherlands.

35 Tel: +31 (0)10 704 0 704. E-mail address: [a.vanderveldt@erasmusmc.nl](mailto:a.vanderveldt@erasmusmc.nl)

36 Harmen J.G. van de Werken, Cancer Computational Biology Center, Erasmus MC Cancer Institute,  
37 Erasmus University Medical Center Rotterdam, Department of Immunology and Department of Urology,  
38 Internal Postal Address NA-1218, PO Box 2040, 3000 CA Rotterdam, the Netherlands.

39 Tel: +31 (0)10 703 1 829. Fax: +31 (0)10 704 4 731. E-mail address: [h.vandewerken@erasmusmc.nl](mailto:h.vandewerken@erasmusmc.nl)

40 **Keywords:** non-clear cell renal cell carcinoma; personalized medicine; renal cell carcinoma;  
41 RNA-sequencing; whole-genome sequencing.

42 **Abstract**

43 **Background**

44 Differences in the clinical course and treatment responses in individual patients with advanced  
45 renal cell carcinoma (RCC) can largely be explained by the different genomics of this disease. To  
46 improve the personalized treatment strategy and survival outcomes for patients with advanced  
47 RCC, the genomic make-up in patients with advanced RCC was investigated to identify putative  
48 actionable mutations and signatures.

49 **Methods**

50 In this prospective multicenter study (NCT01855477), whole-genome sequencing (WGS) data of  
51 locally advanced and metastatic tissue biopsies and matched whole-blood samples were  
52 collected from 91 patients with histopathologically confirmed RCC. WGS data were analyzed for  
53 small somatic variants, copy-number alterations and structural variants. For a subgroup of  
54 patients, RNA sequencing (RNA-Seq) data could be analyzed. RNA-Seq data were clustered on  
55 immunogenic and angiogenic gene expression patterns according to a previously developed  
56 angio-immunogenic gene signature.

57 **Results**

58 For papillary and clear cell RCC, putative actionable drug targets were detected by WGS in 100%  
59 of the patients. RNA-Seq data of clear cell and papillary RCC were clustered using a previously  
60 developed angio-immunogenic gene signature. Analyses of driver mutations and RNA-Seq data  
61 revealed clear differences among different RCC subtypes, showing the added value of WGS and  
62 RNA-Seq over clinicopathological data.

63 **Conclusions**

64 By improving both histological subtyping and the selection of treatment according to actionable  
65 targets and immune signatures, WGS and RNA-Seq may improve therapeutic decision making for  
66 most patients with advanced RCC, including patients with non-clear cell RCC for whom no  
67 standard treatment is available to data. Prospective clinical trials are needed to evaluate the  
68 impact of genomic and transcriptomic diagnostics on survival outcome for advanced RCC  
69 patients.

## 70 **Background**

71 Renal cell carcinoma (RCC) consists of different histological subtypes (1, 2). The most common  
72 histological subtype is clear cell RCC (ccRCC), accounting for approximately 75% of the RCC cases  
73 (3). The vast majority of ccRCC is characterized by the loss of the short arm of chromosome 3  
74 (3p)(4), which harbors several tumor suppressor genes. The function of these genes - *VHL*, *BAP1*,  
75 *PBRM1*, and *SETD2* - is frequently inactivated due to additional somatic mutations or epigenetic  
76 changes of these genes on the other allele (4, 5). Although these genetic aberrations can be  
77 observed in most patients with ccRCC, the clinical behavior in individual patients differs  
78 significantly, from a slowly progressive disease over the years to a rapidly progressive disease  
79 with fast clinical deterioration. Therefore, the management of advanced ccRCC varies from active  
80 surveillance to systemic therapy.

81 The therapeutic landscape for patients with advanced ccRCC has changed significantly, in recent  
82 years. The introduction of tyrosine kinase inhibitors (TKIs) (6, 7), immune checkpoint inhibitors  
83 (ICIs) (8, 9), mammalian target of rapamycin (mTOR) inhibitors (10), and combinations of these  
84 anti-cancer therapies (11-13), has significantly improved the outcome for patients with advanced  
85 ccRCC. However, there are considerable interindividual differences in outcome, and only a  
86 minority of patients experience durable responses (14). For patients with advanced ccRCC,  
87 treatment decision making is guided by the International Metastatic RCC Database Consortium  
88 (IMDC) criteria (15-17). These criteria include only clinical patient characteristics (i.e. hemoglobin  
89 level, time from diagnosis to start of systemic therapy, Karnofsky performance state, calcium  
90 level and neutrophil and platelets count).

91 Moreover, non-clear cell RCC (nccRCC) is a heterogeneous group of different histological  
92 subtypes, including papillary and chromophobe RCC (18). As holds for advanced ccRCC, the  
93 course of nccRCC differs significantly between patients (19, 20). Since the nccRCC subtypes are  
94 considered rare diseases, randomized phase three clinical trials are still lacking for nccRCC (21).  
95 As a result, no clear standard of care for patients with advanced nccRCC has been defined (20,  
96 22).

97 The development of RCC, including its metastatic potential and response to treatment, could  
98 largely be explained by the different genomics (2, 4) and evolutionary pathways (5, 23) of this  
99 disease. Previous studies have focused on the molecular characterization of primary RCC (2, 4,  
100 24) and the genomic evolution of ccRCC (4, 5, 23). For example, RNA expression analysis in ccRCC  
101 has identified different immunogenic and angiogenic gene expression signatures (24, 25). To  
102 improve the individualized treatment strategy and survival outcomes for patients with ccRCC and  
103 nccRCC, more insight into the genomic make-up of advanced RCC is required.

104 The objective of this study was to describe the genomic landscape of advanced RCC, by combining  
105 whole-genome sequencing (WGS) with matched RNA sequencing (RNA-Seq) data. First, WGS was  
106 applied to characterize the genomic make-up of RCC and to identify potential actionable targets  
107 for systemic treatment in individual patients with ccRCC and nccRCC. Next, both WGS and  
108 matched RNA-Seq data were combined for patients with ccRCC and papillary RCC (pRCC). The  
109 RNA-Seq data were applied to cluster RCC based on immunogenic and angiogenic gene  
110 expression patterns, aiming to identify those patients who could benefit from either treatment

- 111 with anti-angiogenic drugs, ICIs or a combination of these therapies and contribute to the next
- 112 steps in personalized medicine in patients with RCC.

## 113 **Methods**

### 114 **Patient cohort, study procedures, sample collection, clinical data**

115 All patients provided written informed consent for participation in the prospective multicenter  
116 Center for Personalized Cancer Treatment (CPCT-02) study (NCT01855477) by the Declaration of  
117 Helsinki. The CPCT-02 trial was approved by the medical ethical committee of the University  
118 Medical Center Utrecht and the Netherlands Cancer Institute, and local approval was provided  
119 for each participating site. Details regarding inclusion criteria, the study protocol, sampling, and  
120 sequencing have been previously described (26). In summary, for this analysis, core needle  
121 biopsies from the tumor lesion, peripheral whole blood samples and clinical data were collected  
122 across 24 hospitals in the Netherlands. Response to treatment was determined according to  
123 RECIST v1.1 (27). WGS data from 103 biopsies of 101 patients with advanced RCC were made  
124 available. Only one sample per patient was selected for the genomic analyses. After checking the  
125 informed consents and the pathological reports, we selected 91 WGS samples (51 previously  
126 described by Priestley *et al.* (26), supplementary data file) and 28 completely new matching RNA-  
127 Seq samples.

### 128 **Pathological diagnosis**

129 To confirm the histopathological diagnosis of RCC, pathology reports were requested via PALGA,  
130 the nationwide network and registry of histo- and cytopathology in the Netherlands (28). Slides  
131 and tissue blocks were not available for pathological revision. Alternatively, the pathology reports  
132 were reviewed by a genito-urinary pathologist (GvL) to determine whether the microscopic  
133 description and immunohistochemistry were compatible with the original diagnosis. The  
134 following subtypes were annotated: clear cell, papillary, chromophobe, tubulocystic, and

135 collecting duct carcinoma. Histopathologically confirmed RCC of which the subtype remained  
136 unclear was categorized as undefined subtype.

### 137 **Whole genome sequencing and preprocessing**

138 Between the 8<sup>th</sup> of August 2016 and the 3<sup>rd</sup> of October 2019, tumor and whole-blood pairs were  
139 whole-genome sequenced at the Hartwig Medical Foundation (HMF) central sequencing center.  
140 When multiple biopsies of one patient were available, the sample covering the most clinical  
141 information and/or the sample with the highest estimated tumor cell percentage was selected.  
142 A HiSeqX system was applied and 2 × 150 base read pairs were generated using standard settings  
143 (Illumina, San Diego, CA, USA). Preprocessing was performed as described by Priestley *et al* (26).  
144 Briefly, read pair mapping was performed using BWA-mem (29) to the reference genome GRCh37  
145 (human) with subsequent systematic variant calling and several quality control and/or correction  
146 steps. The Genome Rearrangement IDentification Software Suite (GRIDSS) (30) was used for  
147 structural variant (SV) calling and LINX (v1.11) (30) for gene fusion event calling. Computational  
148 ploidy estimation and copy-number (CN) assessment was performed using the PURPLE (PURity &  
149 PLoidy Estimator) pipeline (30), estimating tumor purity and CN profile by combining B-allele  
150 frequency (BAF), read depth, and SVs.

### 151 **Somatic variant annotation and filtering**

152 As part of the data request, somatic variants were determined using Strelka and provided by the  
153 HMF. Variant Call Format (VCF) files with somatic variants were annotated based on GRCh37 with  
154 HUGO gene symbols, HGVS notations, gnomAD (31) frequencies using VEP (32) (database release  
155 95, merged cache), with setting "--per\_gene". Exclusively somatic single-nucleotide variants



156 (SNVs), small InDels, multi-nucleotide variants (MNVs) with  $\geq 3$  alternative read observations and  
157 passing variant caller quality control were included in the analyses. Furthermore, population  
158 variants were removed to prevent germline leakage, based on the gnomAD database (v2.0.2)  
159 (31): gnomAD exome (ALL) allele frequency  $\geq 0.001$ ; and gnomAD genome (ALL)  $\geq 0.005$ . Variants  
160 specific to the Dutch CPCT cohort were removed based on a panel-of-normals from 1,762  
161 representative normal blood HMF samples. The most deleterious mutation was used to annotate  
162 the overlapping gene for each sample.

### 163 **Tumor Mutational Burden calculation**

164 The number of mutations per megabase pair was calculated as the amount of somatic genome-  
165 wide SNVs, MNVs, and InDels divided by the number of callable nucleotides in the human  
166 reference genome (GRCh37) FASTA file:

$$167 \quad TMB = \frac{(SNVs_g + MNVs_g + InDels_g)}{\left(\frac{2858674662}{10^6}\right)}$$

### 168 **Ploidy and copy-number analysis**

169 Broad and focal somatic CN alterations in ccRCC were identified by GISTIC2.0 (33) (v2.0.23), using  
170 the following parameters: genegistic 1, gcm extreme, maxseg 4000, broad 1, brlen 0.98, conf  
171 0.95, rx 0, cap 3, saveseg 0, armpeel 1, smallmem 0, res 0.01, ta 0.1, td 0.1, savedata 0, savegene  
172 1, qvt 0.1. The distinction between shallow and deep CN events per region was based on  
173 thresholding performed by GISTIC2.0. The alterations were assigned a score taking both the  
174 amplitude and the frequency of its occurrence across samples into account (G-score).  
175 Thresholding was divided into five CN categories, two for deletions (-2 = deep, possibly

176 homozygous loss, -1 = shallow, possibly heterozygous loss), one for diploid (0 = diploid) and two  
177 for amplifications (1 = few additional copies, often broad gain, 2 = more copies, often focal gain).  
178 Annotation of GISTIC2.0 peaks was performed as follows: A) Wide peaks were annotated with all  
179 overlapping canonical UCSC genes within the genomic limits of the said peak. B) Focal peaks were  
180 annotated based on overlapping genomic coordinates, using custom R scripts and UCSC gene  
181 annotations. As a separate analysis, GISTIC2.0 was executed with `brlen` set to 0.5, calling arm-  
182 level events if at least 50% of the chromosomal arm was affected by broad CN events.

### 183 **Structural variant analysis**

184 SVs affecting genes were imported using custom R scripts, overlapping genes on at least one  
185 breakpoint, using GRCh37 genomic coordinates. SVs with an upstream or downstream Tumor  
186 Allele frequency (TAF) below 0.1 as determined by PURPLE and GRIDSS (30) were discarded along  
187 with SVs that affected all gene exons. In the case of both (multiple) mutations and/or SVs in the  
188 same gene, these were annotated as 'multiple mutations'.

### 189 **Fusion gene analysis**

190 WGS-based LINX TSV files were imported using R and overlapped with the three pillars of  
191 ChimerDB (34); deep sequencing data (ChimerSeq), text mining of PubMed publications  
192 (ChimerPub), with extensive manual annotations (ChimerKB). Events not present in any pillar of  
193 ChimerDB and intra-gene fusions were filtered out. RNA-Seq based fusion genes detected with  
194 Isofox (<https://github.com/hartwigmedical/hmftools/tree/master/isofox>) were imported using R  
195 and overlapped with the fusion events detected in the DNA sequencing.

196

## 197 **Recurrent non-coding (and coding) somatic variants**

198 All filtered non-coding somatic variants, occurring in at least four samples were selected as  
199 recurrent. Since none of these non-coding recurrent variants were located in regulatory elements  
200 (except for the *TERT* promoter) of genes known to be relevant in RCC, we chose to only  
201 communicate the *TERT* hotspot. Using the same methodology for coding variants, selecting those  
202 arising in at least four samples, did not result in pertinent findings.

## 203 **Somatic Driver Genes Analysis**

204 On the ccRCC samples we utilized the dN/dS model (192 Poisson rate parameters; under the full  
205 trinucleotide model) to identify genes undergoing mutational selection in ccRCC using the R  
206 package *dnscv* (35) (v0.0.1.0). The substitution and InDel models were used and corrected for  
207 sequence composition, gene length and mutational signatures (COSMIC database, see  
208 supplementary files). These models test the ratio between nonsynonymous (missense, nonsense  
209 and essential splice site) and background (synonymous) mutations. A  $q$ -value  $< 0.05$  (including  
210 and excluding the InDel model) was used to identify genes that drive selection.

## 211 **Mutational signatures analysis**

212 Mutational signatures analysis was performed using the *MutationalPatterns* R package  
213 (v3.2.0)(36). The mutational signatures based on single base substitutions ( $N = 90$  v3 signatures)  
214 were downloaded from COSMIC (37). SNVs were categorized according to their respective  
215 trinucleotide context (GRCh37) into a mutational spectrum matrix  $M_{ij}$  (where  $i$  represents 1:96  
216 trinucleotide contexts and  $j$  represents the number of 1:91 samples). Subsequently, a constrained  
217 linear combination of the ninety mutational signatures was constructed per sample using non-

218 negative least squares regression implemented in the R package `pracma` (v2.2.9). Mutational  
219 signatures were bootstrapped ( $N = 100$ ) with `MutationalPatterns` and argument ‘method’ set to  
220 “strict” to assess calling stability. Signature contribution for each sample was determined per 100  
221 samplings, per signature.

## 222 **Chromothripsis**

223 Chromothripsis (CT), also known as chromosomal shattering, followed by seemingly random re-  
224 ligation, was detected using `Shatterseek` (38) (v0.4) with default settings. The following definition  
225 of CT was employed: (1)  $\geq 25$  intrachromosomal SVs involved in the event; (2)  $\geq 7$  oscillating CN  
226 segments (2 CN states) or  $\geq 14$  oscillating CN segments (3 CN states); (3) CT event involving  $\geq 20$   
227 Mb; (4) satisfying the test of equal distribution of SV types ( $p$ -value  $> 0.05$ ); and (5) satisfying the  
228 test of nonrandom SV distribution within the cluster region or chromosome ( $p$ -value  $\leq 0.05$ ).

## 229 **Actionable targets**

230 `iClusion` (<https://iclusion.com>) data, which connects specific or gene-level aberrations to clinical  
231 cancer studies, were provided by HMF. This integrates clinical interpretations from Precision  
232 Oncology Knowledge Base (OncoKB) (39), Clinical Interpretation of Variants in Cancer (CIViC) (40)  
233 and Cancer Genome Interpreter (CGI) (41). All targets and biomarkers were overlapped with  
234 filtered molecular data to verify presence. No RCC-specific effectiveness is taken into  
235 consideration with this approach, purely resting the link on the molecular basis of the target to  
236 broaden the horizon of actionable targets. Studies included in the databases mentioned can  
237 conceivably show associations between drugs and targets in other cancer types than RCC or the  
238 subtypes. Targets marked as “gene-level” were generalized for other variation in those genes,

239 not listed in the iClusion data. The identified targets were assessed and manually categorized into  
240 the following three categories: on-label drugs for RCC, off-label available, and investigational  
241 drugs. Drugs were considered on-label when approval was given for any subtype of RCC in the  
242 Netherlands. Whether drugs were on- or off-label available in the Netherlands is defined by the  
243 Dutch Medicines Evaluation Board (“College ter Beoordeling van Geneesmiddelen”) (42). This  
244 evaluation board considers previous approvals by the U.S. Food and Drug Administration (FDA)  
245 and/or European Medicines Agency (EMA).

#### 246 **Germline analysis**

247 Known pathogenic germline variants (GRCh37) related to cancer and/or Von Hippel-Lindau  
248 syndrome were retrieved from ClinVar (43) that were less than 51 bp long, with a review status  
249 of “practice guideline”, “expert panel”, “multiple submitters” or “at least one star”. These ClinVar  
250 variants were used as filter for the import of germline variants from the VCF files of our cohort.  
251 Variants with at least two reads and passing variant caller quality control were included.  
252 Furthermore, variants annotated with “high” impact, in genes with known germline variation in  
253 RCC (*FH*, *SDHA*, *SDHB*, *SDHC*, *SDHD*, *TCEB1*, *FLCN*, *CHEK2*) were included.

#### 254 **RNA sequencing**

255 RNA was isolated from biopsy using the QIAasympy RNA Kit (Qiagen, Hilden, Germany) for  
256 tissue and quantified on the Qubit. Between 50 and 100 ng of RNA was used as input for the  
257 KAPA RNA HyperPrep Kit with RiboErase (Human/Mouse/Rat) library preparation (Roche) on an  
258 automated liquid handling platform (Beckman Coulter). RNA was fragmented (high temperature  
259 in the presence of magnesium) to a target length of 300 bp. Barcoded libraries were sequenced

260 as pools on either a NextSeq 500 (V2.5 reagents) generating 2 x 75 base read pairs or on a  
261 NovaSeq 6000 generating 2 x 150 base read pairs using standard settings (Illumina, San Diego,  
262 CA, USA). BCL output from the sequencing platform was converted to FASTQ using Illumina's  
263 bcl2fastq tool (versions 2.17 to 2.20) using default parameters. RNA-Seq data were aligned using  
264 STAR (44) to GRCh37 resulting in unsorted BAMs including chimeric reads as output. Gene and  
265 transcript counts were generated and used for subsequent fusion detection using Isofox  
266 (<https://github.com/hartwigmedical/hmftools/tree/master/isofox>).

### 267 **RNA sequencing analyses**

268 Raw read counts were imported in R and filtered on protein coding genes based on Ensembl GTF  
269 file (45) (Homo sapiens GRCh37, version 87). *t*-distributed stochastic neighbor embedding (*t*-SNE)  
270 was performed on variance stabilized read counts (generated by DESeq2  
271 varianceStabilizingTransformation) of all protein coding genes. Differential expression analysis  
272 between ccRCC and pRCC was performed on raw read counts using DESeq2 (46) with the Wald-  
273 test. Statistical significant results with Benjamini-Hochberg adjusted *p*-value < 0.05 were further  
274 filtered to base mean > 100 counts and absolute log<sub>2</sub> fold change ≥ 1. The heatmap with the top  
275 most significantly differentially expressed genes (based on the lowest adjusted *p*-value) was  
276 made using variance stabilized read counts and Euclidean distances on scaled data. Gene  
277 signature heatmap was produced with centered Z-Scores with Euclidean distances. Gene set  
278 enrichment analyses were performed using fgsea (47) (Monte Carlo approach with Adaptive  
279 Multilevel Splitting) with MSigDB (48) Hallmarks and Reactome pathways (49) as gene sets.  
280 Reproduction of the D'Costa *et al.* gene signature (25) was done using 65 of 66 original genes,

281 since *PECAM1* was on a genome patch not included in the RNA-Seq mapping supplied by HMF.

282 Heatmaps were produced using pheatmap with Ward.D clustering.

### 283 **Data and material availability**

284 Data were provided by HMF, which were used under data request number DR-088 for the current

285 study. Both WGS, RNA-Seq and clinical data are freely available for academic use from the HMF

286 through standardized procedures and request forms can be found at

287 <https://www.hartwigmedicalfoundation.nl>. All tools and scripts used for processing the WGS

288 data are available at <https://github.com/hartwigmedical/> and/or can be provided by authors

289 upon request.

290

## 291 Results

### 292 Patient selection

293 In total, WGS data of 91 patients with histopathologically confirmed RCC from 24 hospitals in the  
294 Netherlands were included in the analyses (**Figure 1A**). Matched RNA-Seq data were available for  
295 28 patients (**Figure 1A**). Overall, 72 patients were diagnosed with ccRCC, nine patients with pRCC,  
296 one with chromophobe RCC, one with tubulocystic RCC, and one with collecting duct carcinoma.  
297 The RCC subtypes of the remaining seven patients could not be further defined pathologically.  
298 The main biopsy sites were the kidney ( $N = 24$ ), bone ( $N = 15$ ), and lymph nodes ( $N = 14$ ) (**Figure**  
299 **1B**). The median age of patients at time of the biopsy was 65 years (range 40-83), 79% of the  
300 patients were male, and 78% of the patients did not receive any systemic treatment before  
301 biopsy (**Table 1**). Most patients (84/91, 92%) were treated with systemic therapy after the biopsy  
302 was collected. This treatment consisted mostly of TKIs (61/84, 73%) or ICIs (19/84, 23%), whereas  
303 the remaining patients received combination treatment (4/84, 5%).

### 304 Whole-genome sequencing analyses

305 The tumor and blood biopsies were whole genome sequenced (WGS) with a median coverage of  
306 102X and 38X (Supplementary figure 1A). The number and type of somatic changes in the WGS  
307 data were analyzed on both small mutations and structural variations (supplementary figure 2),  
308 showing similar numbers as previous RCC cohorts (7,224 substitutions, Q1–Q3: [5648-8581] vs.  
309 7,050, Q1–Q3: [6434-9504],  $p$ -value = 0.45, Mann-Whitney U test (5)).  
310 Somatic small variants, copy-number alterations (CNAs) and structural variants (SVs) were  
311 identified as described previously (26). The median tumor mutational burden (TMB) of patients



312 with ccRCC was 2.8 [interquartile range (IQR) 1.1] (**Figure 2A**). Only two patients (one with ccRCC  
313 and one with an undefined subtype of RCC) had a TMB > 10 bases. In the two samples with high  
314 TMB, mutational signatures were related to defective DNA mismatch repair, covering more than  
315 25% of their single-nucleotide variants (SNVs) (**Figure 2A/E**). Interestingly, the lowest TMB (i.e.  
316 0.16) was detected in a sample from a patient with tubulocystic RCC ( $N = 1$ ) which had minimal  
317 genomic aberrations in general, and only two detectable SVs (**Figure 2C/D**; tandem duplication  
318 and break-end). SBS40 (unknown etiology) was the dominant mutational signature, with a mean  
319 relative contribution of 74% in this cohort. To assess the reliability of the SBS40 calling, the  
320 mutational signature calling was bootstrapped, which revealed a very high variance (median  
321 difference in the assignment of 37%) in the relative contribution of SBS40 (Supplementary figure  
322 3).

323 The frequency of genomic SNVs, multi-nucleotide variants (MNVs), InDels, and the collective  
324 coding mutations showed a similar pattern across the different RCC subtypes (Supplementary  
325 figure 2, supplementary data file). In total, 713,077 somatically acquired SNVs, 173,579 InDels  
326 and 9,964 MNVs were detected in the RCC genomes. Transversions were more frequently found  
327 than transitions in ccRCC, pRCC and undefined subtypes (Supplementary figure 2B and 2E).  
328 Missense variants were the most dominant protein variant type and accounted for > 60% of the  
329 small variants in all subtypes (Supplementary figure 2G). For 57% of ccRCC, the genome-wide  
330 ploidy was 2, while 32% had a genome doubling with a ploidy of 3 or higher (Supplementary  
331 figure 2D). Differences in DNA ploidy have been associated with tumor differentiation and  
332 diploidy has been related to well-differentiated RCC (50). Considering SVs, a total of 3,121  
333 deletions, 941 translocations, 2,196 tandem duplications, four insertions, 2,714 inversions and

334 641 break-ends were detected (Supplementary Fig 2F). The number of patients with events  
335 considered chromothripsis was limited and present in only five patients with ccRCC, two patients  
336 with pRCC and absent in the other subtypes. Furthermore, these chromothripsis events primarily  
337 did not involve the classic t(3;5) event. Only one of the samples with chromothripsis did have a  
338 t(3;5) translocation (Supplementary figure 4), while these specific translocations were more  
339 frequently detected in the cohort of patients without chromothripsis events (29.7%,  
340 Supplementary figure 5). While clinical data concerning pre-treatment (**Figure 2H**), first  
341 treatment after biopsy (**Figure 2I**), and accompanying RECIST score (**Figure 2J**) was available, no  
342 correlative conclusions were drawn due to heterogeneity which would undermine any reliability  
343 attached to the data (Supplementary figure 6).

344 In patients with ccRCC, both previously described and novel amplifications and deletions were  
345 detected. Statistically significant CNA peaks (A) and arm-level copy-number alterations (B) in  
346 ccRCC are presented in Supplementary figure 7. Arm-level CNAs covering more than 50% were  
347 detected for amplifications of 1q, 5q, 7q, 8q, 12p and 20q, and deletions in 3p, 9p and 14q. All  
348 these CNAs have been described previously(51). Furthermore, in the current cohort,  
349 amplifications of 5p, 7p, 12q, 16p and 20p, and deletions of 4p, 4q, 6p, 8p, 9q, 14p, 18p and 18q  
350 were also statistically significant.

351 Next, the WGS data were analyzed on driver genes of the ccRCC samples using the dN/dS  
352 algorithm and on CNAs by GISTIC 2.0. The driver gene analyses revealed that most driver genes  
353 in ccRCC encompassed variations in the chromosome 3p region: *PBRM1* (94.4%), *VHL* (93.1%),  
354 *SETD2* (90.3%), and *BAP1* (87.5%) together with events in tumor suppressor genes on other

355 chromosomes, such as *CDKN2A/B* (66.7%) and *PTEN* (30.6%) (**Figure 3**, supplementary data file).

356 In addition, many patients with ccRCC had focal deletions in genes described as putative tumor

357 suppressor genes, e.g. *PTPRD* (65.3%) and *NEGR1* (44.4%) (4, 52). Deletions of *PTPRD* have been

358 described as a potential risk factor for the development of ccRCC (52, 53). Moreover,

359 amplifications were present in genes associated with cell proliferation and angiogenesis, such as

360 *CDK6* (55.6%, also prevalent in pRCC at 77.8%) and *CCNE1* (16.7%) (54, 55). Pathogenic germline

361 mutations related to cancer or Von Hippel-Lindau syndrome were found in nine patients in

362 different RCC subtypes and included *ATM*, *FLCN*, *CHEK2*, *FH*, *SDHA* and *MITF* (**Figure 3**).

363 In addition, genes that were previously described as frequently mutated somatically ( $q$ -value <

364 0.05) in (cc)RCC by Braun *et al.* (56) and in pRCC by Turajlic *et al.* (57), that were not statistically

365 significant in our driver gene analysis, were included to extend our analysis. The commonly most

366 affected and added genes in ccRCC were *MITF* (3p), *TERT* (5p), *RADIL* (7p), and *MET* (7q),

367 predominantly as bystanders of arm-level events. The *TERT* promoter hotspot variant (C228T) (5)

368 was detected in both ccRCC ( $N = 10$ ) and pRCC ( $N = 2$ ). *MET* and *RADIL* were also frequently

369 affected in pRCC (both in 77.8%), along with *MED13* and *USP32* (both in 66.7%). Genes associated

370 with poor prognosis in ccRCC showed a low mutational frequency in our cohort (4), such as the

371 Krebs cycle genes (e.g. *SDHA*, *FH*).

372 Furthermore, previously validated fusion events (34) were detected, with *CLTC-VMP1* and *SFPQ-*

373 *TFE3* both occurring once in the ccRCC group, along with a fusion event of *ASPSCR1-TFE3* in one

374 patient with pRCC. The histopathological diagnosis had to be reconsidered for both patients with

375 a detected *TFE3* fusion. As a result, these patients were reallocated in a different subcategory of

376 RCC, i.e. MiT family translocation renal cell carcinomas (1). Overall, characteristic clear cell driver  
377 gene events — such as somatic *VHL* mutations/deletions — were infrequent in nccRCC, except  
378 for *CDKN2A* deletions in pRCC.

379 Next, we investigated if the tumors contained targetable variants (**Figure 4**), that are known  
380 drivers in RCC (**Figure 3**) but also proteins which are considered targetable in other cancer  
381 indications. For example, specific drugs have been developed for target-specific variants encoded  
382 by *CDK4/6* or *EGFR* (58-60). This may result in off-label availability of these drugs for patients with  
383 similar aberrations in RCC, e.g. in the context of a clinical trial (61). Furthermore, somatic  
384 aberrations in cancer genes, e.g. *TP53*, are also considered biomarkers for targeted treatments  
385 (62). Lastly, some variants leading to specific mechanisms were also considered targetable for  
386 treatment. For instance, TKIs targeting VEGF signaling are known to be effective in patients with  
387 *VHL* mutations and are on-label available for patients with RCC (63). Overall, for the majority (90  
388 out of 91) of patients in this cohort actionable targets were detected, even for patients with  
389 nccRCC for whom no standard treatment is available to date.

### 390 **Transcriptome analyses of advanced RCC**

391 Differential Expression Analysis (DEA) was performed on RNA-Seq data (Supplementary figure  
392 1B) to discriminate the two most frequently diagnosed histological subtypes, ccRCC ( $N = 24$ ) and  
393 pRCC ( $N = 4$ ). Next to the  $t$ -distributed stochastic neighbor embedding ( $t$ -SNE), which showed a  
394 clear separation between the two subtypes (Supplementary figure 8), the DEA resulted in 1,546  
395 significantly (adjusted  $p$ -value  $< 0.05$ ) differentially expressed genes. The hundred genes with the  
396 smallest adjusted  $p$ -value are shown in **Figure 5A**. In this top hundred list, several genes are

397 known to be associated with the development or course of RCC. For instance, *LOX* (64) and  
398 *MAPKAPK3* (65) correlate with poor survival in RCC. In addition, various other genes were  
399 differentially expressed and have been described in other malignancies, such as *TUSC2* (66),  
400 *CAPN1* (67), *PCSK6* (68), and *CD2* (69). The differential expression of these genes confirmed a  
401 clear distinction between pRCC and ccRCC at the transcriptomic level.

402 Second, the pathway analysis (**Figure 5B**) of the 1,546 significant differentially expressed genes  
403 revealed cancer hallmarks such as oxidative phosphorylation and epithelial-mesenchymal  
404 transition (EMT), among others (70). Significant Reactome pathways (49) of differentially  
405 expressed genes in ccRCC compared to pRCC samples mainly showed pathways related to VEGF  
406 and collagen formation. Pathways related to poor prognosis (4), such as the AMPK complex, the  
407 Krebs cycle genes, the pentose phosphate pathway and fatty acid synthesis, were not  
408 differentially expressed between ccRCC and pRCC. A heatmap of the top differentially expressed  
409 genes between ccRCC and pRCC and a *t*-SNE plot show that RCC samples of undefined subtype  
410 cluster with either ccRCC or pRCC samples based on the differential gene expression of these  
411 subtypes (Supplementary figure 9).

412 The 66 gene-signature has been based on previous data from the IMmotion150 trial (25). High  
413 expression of 'angiogenic' genes and specific 'invasion' genes is applied to sub-classify RCC as  
414 'angiogenic', which would be predictive for response to TKIs targeting VEGF signaling. In case of  
415 high expression in 'Ca<sup>2+</sup>-Flux', 'T-Effector', and other 'invasion' genes, RCC is sub-classified as  
416 'immunogenic', indicating a likely response to ICIs. According to this gene signature, ccRCC cases  
417 in the current cohort could be classified as either immunogenic or angiogenic (**Figure 5C**).

418 Moreover, all patients with pRCC had low expression of these genes, except for one individual  
419 patient with expression of *EDNRB* (71).

420

## 421 Discussion

422 In this study, the genomic and transcriptomic landscape of advanced RCC was characterized for  
423 91 individual patients. First, genomic data showed that, next to *VHL* alterations (93.1%), most  
424 common driver gene mutations in ccRCC included alterations in tumor suppressor genes of  
425 different pathways such as *SETD2* (90.3%) and *PTEN* (30.6%). While TMB was comparable  
426 amongst the different subtypes of RCC, the driver gene analyses showed a distinctive pattern  
427 between patients with ccRCC and nccRCC. Furthermore, WGS revealed potential actionable  
428 targets for 90 out of 91 patients and WGS might therefore contribute to a more individualized  
429 treatment strategy for patients with advanced RCC.

430 For a subgroup of patients ( $N = 28$ ), transcriptomic data were also generated. RNA-Seq  
431 could be applied to distinguish ccRCC, pRCC and histologically undefined RCC based on the  
432 differential gene expression. Using the 66-gene signature (25) on the RNA-Seq data, made it  
433 possible to sub-categorize ccRCC into immunogenic or angiogenic signatures, whereas  
434 classification in pRCC ( $N = 4$ ) using these signatures was not feasible.

435

436 At the genomic level, the findings for ccRCC mainly corresponded with previous findings (4, 5,  
437 72). Previously described statistically significant arm-level events were also found in this cohort,  
438 i.e., amplifications of 1q, 5q, 7q, 8q, 12p and 20q, and deletions in 3p, 9p and 14q. However, a  
439 striking difference in the frequency of some events is caused by a distinct definition of ‘arm-level’.  
440 For instance, both full loss of 3p and focal loss of events along 3p21-p25 (*VHL*, *PBRM1*, *BAP1*,  
441 *SETD2*) are counted as ‘arm-level’ in the ccRCC characterization from the Cancer Genome Atlas  
442 Research Network (4). In contrast, we defined these (and other large) events as covering >50%

443 of the chromosome arm (Supplementary Figure 7). The massive contribution of SBS40 to the  
444 mutational landscape of nearly all RCC subtypes in this cohort is remarkable. However,  
445 bootstrapping showed that SBS40 was the least robust signature, indicating that this signature  
446 could act as a sink for mutations that are difficult to fit. Since CPCT-02 cohorts with other tumor  
447 types did not show the high contribution of SBS40 (73, 74), this is certainly not a result of a bias  
448 in the sequencing or our workflows. In contrast to other ccRCC studies, the number of  
449 chromothriptic events was limited in our study and occurred in only five patients. In previous  
450 studies, chromothripsis was defined as the combination of a chromothripsis event and a  
451 translocation event with concurrent 3p loss and 5q gain, which were called “t(3;5) chromothripsis  
452 events” (5). Although both chromothripsis and translocation (t(3;5)) events occurred in our  
453 cohort, for most of the cases, these events were independent of each other ( $\chi^2$  test, p-value =  
454 0.6193, events visualized in Supplementary figures 4 and 5).

455         At the transcriptomic level, assigning ccRCC biopsies to either immunogenic or angiogenic  
456 signatures may indicate which treatment could be most beneficial for individual patients. The  
457 introduction of ICIs has significantly changed the therapeutic landscape for patients with  
458 advanced ccRCC (75, 76), resulting in a clinical need to select patients who will benefit from  
459 angiogenic or immunogenic treatment (17). RNA-seq data could assist clinical decision making  
460 when choosing the optimal treatment strategy for the individual patient with advanced ccRCC.  
461 For patients with high expression of genes annotated as immunogenic, first-line treatment with  
462 ICIs should be considered, whereas, for patients with high expression in angiogenic genes,  
463 treatment with a TKI should be taken into consideration. For those patients with low expression  
464 throughout all these genes, combination treatment with TKI/ICI may be considered. However,



465 treatment based on actionable targets identified by WGS could be the most effective option.  
466 Treatment selection based on gene expression has already shown promising results for patients  
467 with RCC (12, 77). However, further research in a prospective setting is still warranted (78).

468

469 The distinctive mutational gene pattern between ccRCC and nccRCC showed that these tumors  
470 are different entities, while differences within the nccRCC subtypes were also evident. For  
471 example, none of the patients with nccRCC had somatic *VHL* alterations and other ccRCC driver  
472 genes hardly showed mutations in nccRCC. This is of great importance, as the development of  
473 targeted drugs is based on driver mutations or their downstream consequences. For instance,  
474 the frequently mutated *VHL* gene in ccRCC has been the basis for the developing angiogenesis  
475 inhibitors. The loss-of-function mutations in this tumor-suppressor gene result in the  
476 accumulation of *HIF1 $\alpha$ /2 $\alpha$* , eventually leading to overexpression of *VEGF/PDGF*, *AXL*, and *MET*,  
477 among others (63, 79). Several TKIs that have been approved for the treatment of advanced  
478 ccRCC (6, 7, 63, 80) and interfere at different levels in this cascade (63, 79). More recently,  
479 Hypoxia Inducible Factor (HIF) inhibition has also shown proven efficacy in patients with *VHL*  
480 alterations (81). However, as patients with nccRCC in our cohort showed no mutations in *VHL* or  
481 other angiogenesis related pathways, it is questionable whether treatment directed against the  
482 *VHL* pathway would be the most effective therapy for this group of patients. On the other hand,  
483 germline mutations associated with specific genetic syndromes were detected in several patients  
484 with nccRCC. For instance, the patient with tRCC had a germline *FH* mutation, which makes it  
485 likely that this patient suffered from hereditary leiomyomatosis renal cell carcinoma syndrome  
486 (HLRCC) (82). Moreover, patients with a germline *FLCN* mutation may suffer from the Birt-Hogg-

487 Dubé syndrome, often associated with chromophobe renal cell carcinoma or oncocytoma (83).

488 Our germline analysis shows that the number of germline mutation is relatively high in the more

489 rare subtypes of RCC, demonstrating the importance of germline mutation analysis for (rare

490 forms of) nccRCC. Since germline mutations play an important role in the development of RCC

491 and are often associated with particular types of RCC, detecting these mutations allows for

492 personalized and targeted treatment of the affected patients.

493

494 In clinical practice, RCC is usually defined histopathologically. As a result, there is a large

495 dependency on experienced pathologists. However, discrepancies among these experts remain

496 (84, 85). In our cohort, nearly 8% of RCC cases could not be sub-classified through

497 histopathological assessment. Thereby, for two patients, a fusion gene was predicted using WGS

498 which led to the revision of the original histological diagnosis and allocation to a different

499 subgroup, i.e. MiT family translocation renal cell carcinoma (1). As the histopathological

500 classification defines the treatment strategy, this could have a significant clinical impact. Since

501 different subtypes and growth patterns of RCC are driven by gene expression (86), a next

502 generation sequencing-based classifier could be feasible. Here, we showed that analyses of driver

503 mutations (*VHL*, *PBRM1*, *SETD2*) and RNA-Seq data reveal clear differences among the different

504 RCC subtypes. As shown in Supplementary Figures 8 and 9, clustering of the undefined RCC

505 subtypes is feasible and could be useful to clarify the histological subtype in clinical practice.

506

507 This study has some important limitations. First, the collected clinical data within the CPCT-02

508 study were limited and therefore it was not possible to reliably correlate genomic and

509 transcriptomic findings to clinical data. A correlation with clinical data and outcome could have  
510 confirmed whether patients with certain gene signatures indeed had benefit from a specific  
511 treatment. Therefore, validation in a prospective trial is needed before clinical implementation.

512         Second, the limited number of patients with nccRCC made it challenging to run separate  
513 analyses for this group. Since the subgroup of patients with nccRCC consists of less common and  
514 heterogeneous subtypes, very little is known about the genomics of nccRCC. Therefore, we  
515 decided to include all patients with nccRCC, even subgroups containing only a single patient.  
516 Finally, the collected data were heterogeneous, with a broad spectrum of pre-treatment  
517 schedule, different treatment strategies after biopsy (**Supplementary figure 6**). All patients had  
518 metastatic or locally advanced disease but biopsies taken from metastatic and the kidney  
519 (primary site) were both included in the analyses. This strategy could have significantly impacted  
520 the analysis. However, previous studies have shown clear consistencies between primary tumor  
521 biopsies and their metastasis counterpart<sup>5</sup>. In addition, the heterogeneity in this cohort reflects  
522 the daily clinical practice of patients who present with advanced RCC, including primary  
523 metastatic disease. Despite this clinical heterogeneity, a clear genomic and transcriptomic signal  
524 could be extracted, indicating that the genomic and transcriptomic analyses are feasible for  
525 clinical implementation.

526

527

## 528 **Conclusions**

529 In conclusion, there are evident genomic and transcriptomic differences between RCC subtypes.  
530 The analysis of driver mutations, in combination with the clustering of RNA-Seq data, could assist  
531 the histopathological subtyping of RCCs in clinical practice. In addition, RNA-Seq data could  
532 identify patients with ccRCC who may benefit more from treatment with either ICIs, TKIs or a  
533 combination of these drugs. Genomic and transcriptomic analyses are promising to identify  
534 actionable targets and individualize treatment strategies in most patients with RCC, even for  
535 patients with nccRCC. Although these results are promising, prospective clinical trials are still  
536 needed to evaluate whether genomic and transcriptomic diagnostics contribute to improved  
537 survival outcomes in individual patients with advanced RCC.

538

539 **Tables**

540

541 **Table 1. Overview of patients' characteristics**

|                                                     | <b>Frequency</b> | <b>Percentage</b> |
|-----------------------------------------------------|------------------|-------------------|
| <b>Sex</b>                                          |                  |                   |
| Male                                                | <b>72</b>        | <b>79%</b>        |
| Female                                              | <b>19</b>        | <b>21%</b>        |
| <b>Median age 65 years [range 40-83]</b>            | -----            | -----             |
| <b>Histological subtype</b>                         |                  |                   |
| <b>Clear cell RCC (ccRCC)</b>                       | <b>72</b>        | <b>79%</b>        |
| <b>Non-clear cell RCC (nccRCC)</b>                  | <b>12</b>        | <b>13%</b>        |
| Papillary RCC (pRCC)                                | 9                | 75%               |
| Chromophobe RCC (chRCC)                             | 1                | 8%                |
| Collecting duct carcinoma (CDC)                     | 1                | 8%                |
| Tubulocystic RCC (tRCC)                             | 1                | 8%                |
| <b>Undefined subtype</b>                            | <b>7</b>         | <b>8%</b>         |
| <b>Prior systemic treatment (n=number of lines)</b> |                  |                   |
| No                                                  | <b>71</b>        | <b>78%</b>        |
| Yes (1)                                             | <b>10</b>        | <b>11%</b>        |
| Yes (≥2)                                            | <b>10</b>        | <b>11%</b>        |
| <b>Treatment after biopsy (N = 84)</b>              |                  |                   |
| <b>Tyrosine kinase inhibitors (TKIs)</b>            | <b>61</b>        | <b>73%</b>        |
| Pazopanib                                           | 36               | 59%               |
| Sunitinib                                           | 23               | 38%               |
| Cabozantinib                                        | 1                | 1.6%              |
| Lenvatinib                                          | 1                | 1.6%              |
| <b>Immune checkpoint inhibitors (ICIs)</b>          | <b>19</b>        | <b>23%</b>        |
| Nivolumab monotherapy                               | 13               | 68%               |
| Nivolumab + ipilimumab                              | 6                | 32%               |
| <b>Combination treatment</b>                        | <b>4</b>         | <b>5%</b>         |
| Avelumab + axitinib                                 | 4                | 100%              |

542

543

## 544 **Figure legends**

### 545 **Figure 1 Overview of sample selection and biopsy sites**

546 **1A** illustrates the selection of samples for the WGS ( $N = 91$ ) and matched RNA-Seq ( $N = 28$ )  
547 analyses. In **1B**, the main biopsy sites are shown. Next to the illustrated biopsy sites, other biopsy  
548 sites ( $N = 20$ ) include biopsies from soft tissue, muscle biopsies and biopsies from subcutaneous  
549 tissue. Figure **1B** was created with biorender.

### 550 **Figure 2 Overview of genomic characteristics of whole-genome sequenced advanced RCC** 551 **cohort ( $N = 91$ )**

552 Track **A** shows the tumor mutational burden (mutations per Mb; yellow for low (0-5), orange for  
553 medium (5-10) and red for high (> 10)). Track **B** shows the mean genome-wide ploidy, with white  
554 representing diploidy. Tracks **C** and **D** illustrate the abundance of structural variants and the  
555 relative frequency of the types of these variants. Tracks **E** and **F** show the relative mutational  
556 signature contribution (COSMIC signatures v3) and the relative frequency of mutational changes  
557 at the base level. Track **G** shows the presence of chromothripsis. Track **H** shows whether patients  
558 were treatment naive at the time of biopsy. Tracks **I** and **J** indicate the first treatment given after  
559 biopsy (if any) and the first tumor response according to RECIST v1.1, respectively. On the x-axis,  
560 the figure is arranged in descending order by tumor mutational burden per RCC subtype. ccRCC  
561 = clear cell renal cell carcinoma. pRCC = papillary renal cell carcinoma. Undefined subtype = renal  
562 cell carcinoma, with undefined subtype. chRCC = chromophobe renal cell carcinoma. CDC =  
563 collecting duct carcinoma. tRCC = tubulocystic renal cell carcinoma. NA = not available.

### 564 **Figure 3 Overview of coding mutations and copy-number alterations in driver genes in whole-** 565 **genome sequenced advanced renal cell carcinoma cohort ( $N = 91$ )**

566 The oncoplot in track **A** shows mutations (filled center) and copy-number alterations (grid cell  
567 background) of driver genes determined by dN/dS and GISTIC2.0. Track **B** also shows an oncoplot,  
568 but on selected genes, not passing any statistical threshold. Germline pathogenic mutations are  
569 indicated with the capital letter 'G' (and red border), utilizing the same color coding as the somatic  
570 mutations. Consequential fusion genes are indicated in yellow, with a red border. Track **C** shows  
571 the tumor mutational burden (mutations per Mb; yellow for low (0-5), orange for medium (5-10)

572 and red for high (> 10)). Tracks **D**, **E** and **F** shows whether patients were treatment naive at time  
573 of biopsy, if systemic treatment was given after time of biopsy, and the first tumor response after  
574 systemic treatment according to RECIST v1.1, respectively. Bold sample names with asterisks  
575 indicate MiT family translocation RCC. The figure is arranged in descending order by tumor  
576 mutational burden per RCC subtype on the x-axis.

577 **Figure 4 Overview of DNA-based biomarkers and potential treatment options in the whole-**  
578 **genome sequenced advanced renal cell carcinoma cohort (N = 91)**

579 Track **A** Percentage of potentially available treatment options based on genomic characteristics.  
580 Treatment options are categorized according to the highest level of drug availability in clinical  
581 practice (on label available – off label available – investigational drugs). Track **B** Potentially  
582 actionable alterations at gene-level with each column representing a sample, ordered  
583 descendingly by tumor mutational burden per subtype on the x-axis. A detailed description of  
584 actionable targets can be found in Supplementary Data file 1.

585 **Figure 5 RNA sequencing cohort and differential expression analysis between clear cell renal**  
586 **cell carcinoma (ccRCC) and papillary RCC (pRCC) with classification according to gene**  
587 **signatures<sup>25</sup>**

588 Track **A** shows a heatmap of Z-scores of variance stabilized values with unsupervised clustering of  
589 the top 100 transcripts based on the smallest adjusted *p*-value and colored according to Z-scores.  
590 Tracks **B** shows gene set enrichments based on sets (y-axis) from the molecular signatures  
591 database hallmarks and Reactome pathways, with the normalized enrichment score (NES) on the  
592 x-axis. Bar charts are visualized with ccRCC taken as reference (N = 24) (positive NES equals  
593 expression up in ccRCC and down in pRCC (N = 4)). Track **C** shows unsupervised clustering on the  
594 rows (patients) with color coding indicating the RCC subtype (purple for ccRCC and pink for pRCC)  
595 and colored according to Z-scores. The x-axis has been cut into several gene groups related to  
596 angiogenesis, invasion, Ca<sup>2+</sup>-flux and T-effector cells, as defined by D'Costa *et al.*<sup>25</sup> and their stated  
597 order.

598  
599

## 600 **Declarations**

### 601 **Ethics approval and consent to participate**

602 All patients provided written informed consent for participation in the prospective multicenter  
603 Center for Personalized Cancer Treatment (CPCT-02) study (NCT01855477). The CPCT-02 trial was  
604 approved by the medical ethical committee of the University Medical Center Utrecht and the  
605 Netherlands Cancer Institute. Local approval was provided for each participating site.

606

### 607 **Consent for publication**

608 Not applicable.

609

### 610 **Availability of data and materials**

611 Data were provided by HMF, which were used under data request number DR-088 for the current  
612 study. Both WGS, RNA-Seq and clinical data are freely available for academic use from the HMF  
613 through standardized procedures and request forms can be found at  
614 <https://www.hartwigmedicalfoundation.nl>. All tools and scripts used for processing the WGS  
615 data are available at <https://github.com/hartwigmedical/> and/or can be provided by authors  
616 upon request.

617

### 618 **Competing interests**

619 K.J. declares travel expenses from Ipsen, outside the submitted work; P.H. declares consultancy  
620 roles for Astellas, MSD, Ipsen, Pfizer, AstraZeneca, and Bristol-Myers Squibb, all outside the  
621 submitted work; H.M.W. declares honoraria from Roche and Astellas and travel expenses from  
622 Ipsen and Astellas, all outside the submitted work; S.F.O declares research grants from Novartis,  
623 Pfizer and Celldex Therapeutics and advisory board for Bristol Myers Squibb (all paid to the  
624 institution); M.L. declares speakers fee of BMS and advisory board of MSD, both paid to  
625 institution; R.H.J.M. declares speakers fee from Novartis and advisory role for Servier, patency  
626 from Pamgene, and investigator-initiated research (paid to institution) from Astellas, Bayer,



627 Boehringer-Ingelheim, Cristal Therapeutics, Pamgene, Pfizer, Novartis, Roche, Sanofi, Servier, all  
628 outside the submitted work; M.P.L. declares advisory board for Amgen, Astellas, Astra Zeneca,  
629 Bayer, INCa, Janssen Cilag BV, MSD, Novartis, Pfizer, Roche, Sanofi, Servier, consulting role for  
630 Julius Clinical and Research Grants (paid to institution) from Astellas, Janssen, MSD, Sanofi, all  
631 outside the submitted work; H.J.G.W. declares speakers honoraria from Bayer, Depository  
632 receipts for shares from Cergentis B.V. all outside the submitted work; A.A.M.V. reports advisory  
633 board (all paid to institution) of BMS, MSD, Merck, Pfizer, Ipsen, Eisai, Pierre Fabre, Roche,  
634 Novartis, Sanofi, all outside the submitted work. All other authors declare no competing interests.

635

### 636 **Funding**

637 This study has been supported by the Erasmus Trustfonds and the Erasmus Foundation.

638

### 639 **Authors' contributions**

640 K.J., W.S.G., H.J.G.W. and A.A.M.V. wrote the manuscript, which all authors have reviewed  
641 critically. W.S.G. and H.J.G.W. performed the bioinformatical analyses. K.J. and A.A.M.V. assessed  
642 the clinical data. G.J.L.H.L. reviewed and assessed the histopathological data. P.H., H.M.W., A.B.,  
643 S.F.O, J.M.R., L.V.B., M.L. and R.H.J.M. are clinical contributors. M.P.L. and S.S. participated in the  
644 board of the CPCT-02 study. E.C. coordinated the sequencing of samples and contributed to the  
645 bioinformatical analyses.

646

### 647 **Acknowledgements**

648 This publication and the underlying study have been made possible partly based on the data that  
649 Hartwig Medical Foundation and the Center of Personalized Cancer Treatment (CPCT) have made  
650 available for the study. This study has been made available by the Erasmus Trustfonds and the  
651 Erasmus Foundation. Furthermore, we would like to thank the nationwide network and registry  
652 of histo- and cytopathology in the Netherlands (PALGA) for their assistance in retrieving and  
653 storing the pathological records of the included patients with RCC. Figure 1 was created with  
654 BioRender (<https://biorender.com/>).

## 655 References

- 656 1. Moch H, Cubilla AL, Humphrey PA, Reuter VE, Ulbright TM. The 2016 WHO Classification of  
657 Tumours of the Urinary System and Male Genital Organs-Part A: Renal, Penile, and Testicular Tumours.  
658 *Eur Urol.* 2016;70(1):93-105.
- 659 2. Cancer Genome Atlas Research N, Linehan WM, Spellman PT, Ricketts CJ, Creighton CJ, Fei SS, et  
660 al. Comprehensive Molecular Characterization of Papillary Renal-Cell Carcinoma. *N Engl J Med.*  
661 2016;374(2):135-45.
- 662 3. Padala SA, Barsouk A, Thandra KC, Saginala K, Mohammed A, Vakiti A, et al. Epidemiology of  
663 Renal Cell Carcinoma. *World J Oncol.* 2020;11(3):79-87.
- 664 4. Cancer Genome Atlas Research N. Comprehensive molecular characterization of clear cell renal  
665 cell carcinoma. *Nature.* 2013;499(7456):43-9.
- 666 5. Mitchell TJ, Turajlic S, Rowan A, Nicol D, Farmery JHR, O'Brien T, et al. Timing the Landmark  
667 Events in the Evolution of Clear Cell Renal Cell Cancer: TRACERx Renal. *Cell.* 2018;173(3):611-23 e17.
- 668 6. Motzer RJ, Hutson TE, Tomczak P, Michaelson MD, Bukowski RM, Rixe O, et al. Sunitinib versus  
669 interferon alfa in metastatic renal-cell carcinoma. *N Engl J Med.* 2007;356(2):115-24.
- 670 7. Mendez-Vidal MJ, Molina A, Anido U, Chirivella I, Etxaniz O, Fernandez-Parra E, et al. Pazopanib:  
671 Evidence review and clinical practice in the management of advanced renal cell carcinoma. *BMC*  
672 *Pharmacol Toxicol.* 2018;19(1):77.
- 673 8. Motzer RJ, Escudier B, McDermott DF, George S, Hammers HJ, Srinivas S, et al. Nivolumab versus  
674 Everolimus in Advanced Renal-Cell Carcinoma. *N Engl J Med.* 2015;373(19):1803-13.
- 675 9. Motzer RJ, Rini BI, McDermott DF, Aren Frontera O, Hammers HJ, Carducci MA, et al. Nivolumab  
676 plus ipilimumab versus sunitinib in first-line treatment for advanced renal cell carcinoma: extended  
677 follow-up of efficacy and safety results from a randomised, controlled, phase 3 trial. *Lancet Oncol.* 2019.
- 678 10. Motzer RJ, Escudier B, Oudard S, Hutson TE, Porta C, Bracarda S, et al. Efficacy of everolimus in  
679 advanced renal cell carcinoma: a double-blind, randomised, placebo-controlled phase III trial. *Lancet.*  
680 2008;372(9637):449-56.
- 681 11. Powles T, Plimack ER, Soulieres D, Waddell T, Stus V, Gafanov R, et al. Pembrolizumab plus  
682 axitinib versus sunitinib monotherapy as first-line treatment of advanced renal cell carcinoma  
683 (KEYNOTE-426): extended follow-up from a randomised, open-label, phase 3 trial. *Lancet Oncol.*  
684 2020;21(12):1563-73.
- 685 12. Choueiri TK, Motzer RJ, Rini BI, Haanen J, Campbell MT, Venugopal B, et al. Updated efficacy  
686 results from the JAVELIN Renal 101 trial: first-line avelumab plus axitinib versus sunitinib in patients with  
687 advanced renal cell carcinoma. *Ann Oncol.* 2020;31(8):1030-9.
- 688 13. Rini BI, Powles T, Atkins MB, Escudier B, McDermott DF, Suarez C, et al. Atezolizumab plus  
689 bevacizumab versus sunitinib in patients with previously untreated metastatic renal cell carcinoma  
690 (IMmotion151): a multicentre, open-label, phase 3, randomised controlled trial. *Lancet.*  
691 2019;393(10189):2404-15.
- 692 14. Flippot R, Escudier B, Albiges L. Immune Checkpoint Inhibitors: Toward New Paradigms in Renal  
693 Cell Carcinoma. *Drugs.* 2018;78(14):1443-57.
- 694 15. Heng DY, Xie W, Regan MM, Harshman LC, Bjarnason GA, Vaishampayan UN, et al. External  
695 validation and comparison with other models of the International Metastatic Renal-Cell Carcinoma  
696 Database Consortium prognostic model: a population-based study. *Lancet Oncol.* 2013;14(2):141-8.
- 697 16. Guida A, Le Teuff G, Alves C, Colomba E, Di Nunno V, Derosa L, et al. Identification of  
698 international metastatic renal cell carcinoma database consortium (IMDC) intermediate-risk subgroups  
699 in patients with metastatic clear-cell renal cell carcinoma. *Oncotarget.* 2020;11(49):4582-92.

- 700 17. Vano YA, Ladoire S, Elaidi R, Dermeche S, Eymard JC, Falkowski S, et al. First-Line Treatment of  
701 Metastatic Clear Cell Renal Cell Carcinoma: What Are the Most Appropriate Combination Therapies?  
702 Cancers (Basel). 2021;13(21).
- 703 18. Truong LD, Shen SS. Immunohistochemical diagnosis of renal neoplasms. Arch Pathol Lab Med.  
704 2011;135(1):92-109.
- 705 19. Hong B, Hou H, Chen L, Li Z, Zhang Z, Zhao Q, et al. The Clinicopathological Features and  
706 Prognosis in Patients With Papillary Renal Cell Carcinoma: A Multicenter Retrospective Study in Chinese  
707 Population. Front Oncol. 2021;11:753690.
- 708 20. Sepe P, Ottini A, Pircher CC, Franza A, Claps M, Guadalupi V, et al. Characteristics and Treatment  
709 Challenges of Non-Clear Cell Renal Cell Carcinoma. Cancers (Basel). 2021;13(15).
- 710 21. Powles T, Albiges L, Bex A, Grünwald V, Porta C, Procopio G, et al. ESMO Clinical Practice  
711 Guideline update on the use of immunotherapy in early stage and advanced renal cell carcinoma. Annals  
712 of Oncology. 2021;32(12):1511-9.
- 713 22. Osterman CK, Rose TL. A Systematic Review of Systemic Treatment Options for Advanced Non-  
714 Clear Cell Renal Cell Carcinoma. Kidney Cancer. 2020;4(1):15-27.
- 715 23. Turajlic S, Xu H, Litchfield K, Rowan A, Chambers T, Lopez JI, et al. Tracking Cancer Evolution  
716 Reveals Constrained Routes to Metastases: TRACERx Renal. Cell. 2018;173(3):581-94 e12.
- 717 24. Ricketts CJ, De Cubas AA, Fan H, Smith CC, Lang M, Reznik E, et al. The Cancer Genome Atlas  
718 Comprehensive Molecular Characterization of Renal Cell Carcinoma. Cell Rep. 2018;23(1):313-26 e5.
- 719 25. D'Costa NM, Cina D, Shrestha R, Bell RH, Lin YY, Asghari H, et al. Identification of gene signature  
720 for treatment response to guide precision oncology in clear-cell renal cell carcinoma. Sci Rep.  
721 2020;10(1):2026.
- 722 26. Priestley P, Baber J, Lolkema MP, Steeghs N, de Bruijn E, Shale C, et al. Pan-cancer whole-  
723 genome analyses of metastatic solid tumours. Nature. 2019;575(7781):210-6.
- 724 27. Eisenhauer EA, Therasse P, Bogaerts J, Schwartz LH, Sargent D, Ford R, et al. New response  
725 evaluation criteria in solid tumours: revised RECIST guideline (version 1.1). Eur J Cancer. 2009;45(2):228-  
726 47.
- 727 28. Casparie M, Tiebosch AT, Burger G, Blauwgeers H, van de Pol A, van Krieken JH, et al. Pathology  
728 databanking and biobanking in The Netherlands, a central role for PALGA, the nationwide  
729 histopathology and cytopathology data network and archive. Cell Oncol. 2007;29(1):19-24.
- 730 29. Vasimuddin M, Misra S, Li H, Aluru S. Efficient Architecture-Aware Acceleration of BWA-MEM for  
731 Multicore Systems,. 2019 IEEE International Parallel and Distributed Processing Symposium (IPDPS)  
732 2019:314-24.
- 733 30. Cameron DL, Baber J, Shale C, Papenfuss AT, Valle-Inclan JE, Besselink N, et al. GRIDSS, PURPLE,  
734 LINX: Unscrambling the tumor genome via integrated analysis of structural variation and copy number.  
735 bioRxiv. 2019:781013.
- 736 31. Karczewski KJ, Francioli LC, Tiao G, Cummings BB, Alfoldi J, Wang Q, et al. The mutational  
737 constraint spectrum quantified from variation in 141,456 humans. Nature. 2020;581(7809):434-43.
- 738 32. McLaren W, Gil L, Hunt SE, Riat HS, Ritchie GRS, Thormann A, et al. The Ensembl Variant Effect  
739 Predictor. Genome Biology. 2016;17(1):122.
- 740 33. Mermel CH, Schumacher SE, Hill B, Meyerson ML, Beroukhim R, Getz G. GISTIC2.0 facilitates  
741 sensitive and confident localization of the targets of focal somatic copy-number alteration in human  
742 cancers. Genome Biology. 2011;12(4):R41.
- 743 34. Jang YE, Jang I, Kim S, Cho S, Kim D, Kim K, et al. ChimerDB 4.0: an updated and expanded  
744 database of fusion genes. Nucleic Acids Research. 2019;48(D1):D817-D24.
- 745 35. Martincorena I, Raine KM, Gerstung M, Dawson KJ, Haase K, Van Loo P, et al. Universal Patterns  
746 of Selection in Cancer and Somatic Tissues. Cell. 2017;171(5):1029-41 e21.

- 747 36. Blokzijl F, Janssen R, van Boxtel R, Cuppen E. Mutational Patterns: comprehensive genome-wide  
748 analysis of mutational processes. *Genome Medicine*. 2018;10(1):33.
- 749 37. Alexandrov LB, Kim J, Haradhvala NJ, Huang MN, Tian Ng AW, Wu Y, et al. The repertoire of  
750 mutational signatures in human cancer. *Nature*. 2020;578(7793):94-101.
- 751 38. Cortés-Ciriano I, Lee JJ-K, Xi R, Jain D, Jung YL, Yang L, et al. Comprehensive analysis of  
752 chromothripsis in 2,658 human cancers using whole-genome sequencing. *Nature Genetics*.  
753 2020;52(3):331-41.
- 754 39. Debyani C, Jianjiong G, Sarah P, Ritika K, Hongxin Z, Jiaojiao W, et al. OncoKB: A Precision  
755 Oncology Knowledge Base. *JCO Precision Oncology*. 2017(1):1-16.
- 756 40. Griffith M, Spies NC, Krysiak K, McMichael JF, Coffman AC, Danos AM, et al. CIViC is a community  
757 knowledgebase for expert crowdsourcing the clinical interpretation of variants in cancer. *Nature*  
758 *Genetics*. 2017;49(2):170-4.
- 759 41. Tamborero D, Rubio-Perez C, Deu-Pons J, Schroeder MP, Vivancos A, Rovira A, et al. Cancer  
760 Genome Interpreter annotates the biological and clinical relevance of tumor alterations. *Genome*  
761 *Medicine*. 2018;10(1):25.
- 762 42. College ter Beoordeling van Geneesmiddelen. <https://www.cbg-meb.nl/> [Available from:  
763 <https://www.cbg-meb.nl/>].
- 764 43. Landrum MJ, Chitipiralla S, Brown GR, Chen C, Gu B, Hart J, et al. ClinVar: improvements to  
765 accessing data. *Nucleic Acids Research*. 2019;48(D1):D835-D44.
- 766 44. Dobin A, Davis CA, Schlesinger F, Drenkow J, Zaleski C, Jha S, et al. STAR: ultrafast universal RNA-  
767 seq aligner. *Bioinformatics*. 2012;29(1):15-21.
- 768 45. Yates AD, Achuthan P, Akanni W, Allen J, Allen J, Alvarez-Jarreta J, et al. Ensembl 2020. *Nucleic*  
769 *Acids Research*. 2019;48(D1):D682-D8.
- 770 46. Love MI, Huber W, Anders S. Moderated estimation of fold change and dispersion for RNA-seq  
771 data with DESeq2. *Genome Biology*. 2014;15(12):550.
- 772 47. Korotkevich G, Sukhov V, Budin N, Shpak B, Artyomov MN, Sergushichev A. Fast gene set  
773 enrichment analysis. *bioRxiv*. 2021:060012.
- 774 48. Liberzon A, Birger C, Thorvaldsdottir H, Ghandi M, Mesirov JP, Tamayo P. The Molecular  
775 Signatures Database (MSigDB) hallmark gene set collection. *Cell Syst*. 2015;1(6):417-25.
- 776 49. Jassal B, Matthews L, Viteri G, Gong C, Lorente P, Fabregat A, et al. The reactome pathway  
777 knowledgebase. *Nucleic Acids Res*. 2020;48(D1):D498-D503.
- 778 50. Abou-Rebyeh H, Borgmann V, Nagel R, Al-Abadi H. DNA ploidy is a valuable predictor for  
779 prognosis of patients with resected renal cell carcinoma. *Cancer*. 2001;92(9):2280-5.
- 780 51. Beroukhim R, Brunet JP, Di Napoli A, Mertz KD, Seeley A, Pires MM, et al. Patterns of gene  
781 expression and copy-number alterations in von-hippel lindau disease-associated and sporadic clear cell  
782 carcinoma of the kidney. *Cancer Res*. 2009;69(11):4674-81.
- 783 52. Ortiz B, White JR, Wu WH, Chan TA. Deletion of Ptpd and Cdkn2a cooperate to accelerate  
784 tumorigenesis. *Oncotarget*. 2014;5(16):6976-82.
- 785 53. Du Y, Su T, Tan X, Li X, Xie J, Wang G, et al. Polymorphism in protein tyrosine phosphatase  
786 receptor delta is associated with the risk of clear cell renal cell carcinoma. *Gene*. 2013;512(1):64-9.
- 787 54. Tadesse S, Yu M, Kumarasiri M, Le BT, Wang S. Targeting CDK6 in cancer: State of the art and  
788 new insights. *Cell Cycle*. 2015;14(20):3220-30.
- 789 55. Li Y, Shen Y, Zhu Z, Wen H, Feng C. Comprehensive analysis of copy number variance and  
790 sensitivity to common targeted therapy in clear cell renal cell carcinoma: In silico analysis with in vitro  
791 validation. *Cancer Med*. 2020;9(16):6020-9.
- 792 56. Braun DA, Hou Y, Bakouny Z, Ficial M, Sant' Angelo M, Forman J, et al. Interplay of somatic  
793 alterations and immune infiltration modulates response to PD-1 blockade in advanced clear cell renal  
794 cell carcinoma. *Nat Med*. 2020;26(6):909-18.

- 795 57. Turajlic S, Larkin J, Swanton C. SnapShot: Renal Cell Carcinoma. *Cell*. 2015;163(6):1556- e1.
- 796 58. Du Z, Brown BP, Kim S, Ferguson D, Pavlick DC, Jayakumaran G, et al. Structure-function analysis  
797 of oncogenic EGFR Kinase Domain Duplication reveals insights into activation and a potential approach  
798 for therapeutic targeting. *Nat Commun*. 2021;12(1):1382.
- 799 59. Ho GF, Chai CS, Alip A, Wahid MIA, Abdullah MM, Foo YC, et al. Real-world experience of first-  
800 line afatinib in patients with EGFR-mutant advanced NSCLC: a multicenter observational study. *BMC*  
801 *Cancer*. 2019;19(1):896.
- 802 60. Braal CL, Jongbloed EM, Wilting SM, Mathijssen RHJ, Koolen SLW, Jager A. Inhibiting CDK4/6 in  
803 Breast Cancer with Palbociclib, Ribociclib, and Abemaciclib: Similarities and Differences. *Drugs*.  
804 2021;81(3):317-31.
- 805 61. van der Velden DL, Hoes LR, van der Wijngaart H, van Berge Henegouwen JM, van Werkhoven E,  
806 Roepman P, et al. The Drug Rediscovery protocol facilitates the expanded use of existing anticancer  
807 drugs. *Nature*. 2019;574(7776):127-31.
- 808 62. Zhu G, Pan C, Bei JX, Li B, Liang C, Xu Y, et al. Mutant p53 in Cancer Progression and Targeted  
809 Therapies. *Front Oncol*. 2020;10:595187.
- 810 63. Alonso-Gordoa T, Garcia-Bermejo ML, Grande E, Garrido P, Carrato A, Molina-Cerrillo J.  
811 Targeting Tyrosine kinases in Renal Cell Carcinoma: "New Bullets against Old Guys". *Int J Mol Sci*.  
812 2019;20(8).
- 813 64. Lin S, Zheng L, Lu Y, Xia Q, Zhou P, Liu Z. Comprehensive analysis on the expression levels and  
814 prognostic values of LOX family genes in kidney renal clear cell carcinoma. *Cancer Med*.  
815 2020;9(22):8624-38.
- 816 65. Oh E, Kim JH, Um J, Jung DW, Williams DR, Lee H. Genome-Wide Transcriptomic Analysis of Non-  
817 Tumorigenic Tissues Reveals Aging-Related Prognostic Markers and Drug Targets in Renal Cell  
818 Carcinoma. *Cancers (Basel)*. 2021;13(12).
- 819 66. Rimkus T, Sirkisoon S, Harrison A, Lo HW. Tumor suppressor candidate 2 (TUSC2, FUS-1) and  
820 human cancers. *Discov Med*. 2017;23(128):325-30.
- 821 67. Pan XQ, Huang W, Jin LW, Lin HZ, Xu XY. A Novel Pyroptosis-Related Prognostic Signature for  
822 Risk Stratification and Clinical Prognosis in Clear Cell Renal Cell Carcinoma. *Dis Markers*.  
823 2022;2022:8093837.
- 824 68. Wang P, Wang F, Wang L, Pan J. Proprotein convertase subtilisin/kexin type 6 activates the  
825 extracellular signal-regulated kinase 1/2 and Wnt family member 3A pathways and promotes in vitro  
826 proliferation, migration and invasion of breast cancer MDA-MB-231 cells. *Oncol Lett*. 2018;16(1):145-50.
- 827 69. Han J, Choi YL, Kim H, Choi JY, Lee SK, Lee JE, et al. MMP11 and CD2 as novel prognostic factors  
828 in hormone receptor-negative, HER2-positive breast cancer. *Breast Cancer Res Treat*. 2017;164(1):41-56.
- 829 70. Ding XF, Zhou J, Hu QY, Liu SC, Chen G. The tumor suppressor pVHL down-regulates never-in-  
830 mitosis A-related kinase 8 via hypoxia-inducible factors to maintain cilia in human renal cancer cells. *J*  
831 *Biol Chem*. 2015;290(3):1389-94.
- 832 71. Wuttig D, Zastrow S, Fussel S, Toma MI, Meinhardt M, Kalman K, et al. CD31, EDNRB and  
833 TSPAN7 are promising prognostic markers in clear-cell renal cell carcinoma revealed by genome-wide  
834 expression analyses of primary tumors and metastases. *Int J Cancer*. 2012;131(5):E693-704.
- 835 72. Carlo MI, Mukherjee S, Mandelker D, Vijai J, Kemel Y, Zhang L, et al. Prevalence of Germline  
836 Mutations in Cancer Susceptibility Genes in Patients With Advanced Renal Cell Carcinoma. *JAMA Oncol*.  
837 2018;4(9):1228-35.
- 838 73. van Riet J, van de Werken HJG, Cuppen E, Eskens F, Tesselaar M, van Veenendaal LM, et al. The  
839 genomic landscape of 85 advanced neuroendocrine neoplasms reveals subtype-heterogeneity and  
840 potential therapeutic targets. *Nat Commun*. 2021;12(1):4612.



- 841 74. Angus L, Smid M, Wilting SM, van Riet J, Van Hoeck A, Nguyen L, et al. The genomic landscape of  
842 metastatic breast cancer highlights changes in mutation and signature frequencies. *Nat Genet.*  
843 2019;51(10):1450-8.
- 844 75. Motzer RJ, Tannir NM, McDermott DF, Aren Frontera O, Melichar B, Choueiri TK, et al.  
845 Nivolumab plus Ipilimumab versus Sunitinib in Advanced Renal-Cell Carcinoma. *N Engl J Med.*  
846 2018;378(14):1277-90.
- 847 76. Motzer RJ, Escudier B, McDermott DF, Aren Frontera O, Melichar B, Powles T, et al. Survival  
848 outcomes and independent response assessment with nivolumab plus ipilimumab versus sunitinib in  
849 patients with advanced renal cell carcinoma: 42-month follow-up of a randomized phase 3 clinical trial. *J*  
850 *Immunother Cancer.* 2020;8(2).
- 851 77. Motzer RJ, Powles T, Atkins MB, Escudier B, McDermott DF, Alekseev BY, et al. Final Overall  
852 Survival and Molecular Analysis in IMmotion151, a Phase 3 Trial Comparing Atezolizumab Plus  
853 Bevacizumab vs Sunitinib in Patients With Previously Untreated Metastatic Renal Cell Carcinoma. *JAMA*  
854 *Oncol.* 2021.
- 855 78. Epailard N, Simonaggio A, Elaidi R, Azzouz F, Braychenko E, Thibault C, et al. BIONIKK: A phase 2  
856 biomarker driven trial with nivolumab and ipilimumab or VEGFR tyrosine kinase inhibitor (TKI) in naive  
857 metastatic kidney cancer. *Bull Cancer.* 2020;107(5S):eS22-eS7.
- 858 79. Choueiri TK, Kaelin WG, Jr. Targeting the HIF2-VEGF axis in renal cell carcinoma. *Nat Med.*  
859 2020;26(10):1519-30.
- 860 80. van der Veldt AA, Meijerink MR, van den Eertwegh AJ, Bex A, de Gast G, Haanen JB, et al.  
861 Sunitinib for treatment of advanced renal cell cancer: primary tumor response. *Clin Cancer Res.*  
862 2008;14(8):2431-6.
- 863 81. Jonasch E, Donskov F, Iliopoulos O, Rathmell WK, Narayan VK, Maughan BL, et al. Belzutifan for  
864 Renal Cell Carcinoma in von Hippel-Lindau Disease. *N Engl J Med.* 2021;385(22):2036-46.
- 865 82. Merino MJ, Torres-Cabala C, Pinto P, Linehan WM. The morphologic spectrum of kidney tumors  
866 in hereditary leiomyomatosis and renal cell carcinoma (HLRCC) syndrome. *Am J Surg Pathol.*  
867 2007;31(10):1578-85.
- 868 83. Benusiglio PR, Giraud S, Deveaux S, Mejean A, Correas JM, Joly D, et al. Renal cell tumour  
869 characteristics in patients with the Birt-Hogg-Dube cancer susceptibility syndrome: a retrospective,  
870 multicentre study. *Orphanet J Rare Dis.* 2014;9:163.
- 871 84. Nyk L, Malewski W, Kaczmarek K, Kryst P, Pyzlak M, Andrychowicz A, et al. Interobserver  
872 Variability in Assessment of Renal Mass Biopsies. *Urol J.* 2020;18(4):400-3.
- 873 85. Haas M. Donor kidney biopsies: pathology matters, and so does the pathologist. *Kidney Int.*  
874 2014;85(5):1016-9.
- 875 86. Osunkoya AO, Young AN, Wang W, Netto GJ, Epstein JI. Comparison of gene expression profiles  
876 in tubulocystic carcinoma and collecting duct carcinoma of the kidney. *Am J Surg Pathol.*  
877 2009;33(7):1103-6.

878

# Figure 1

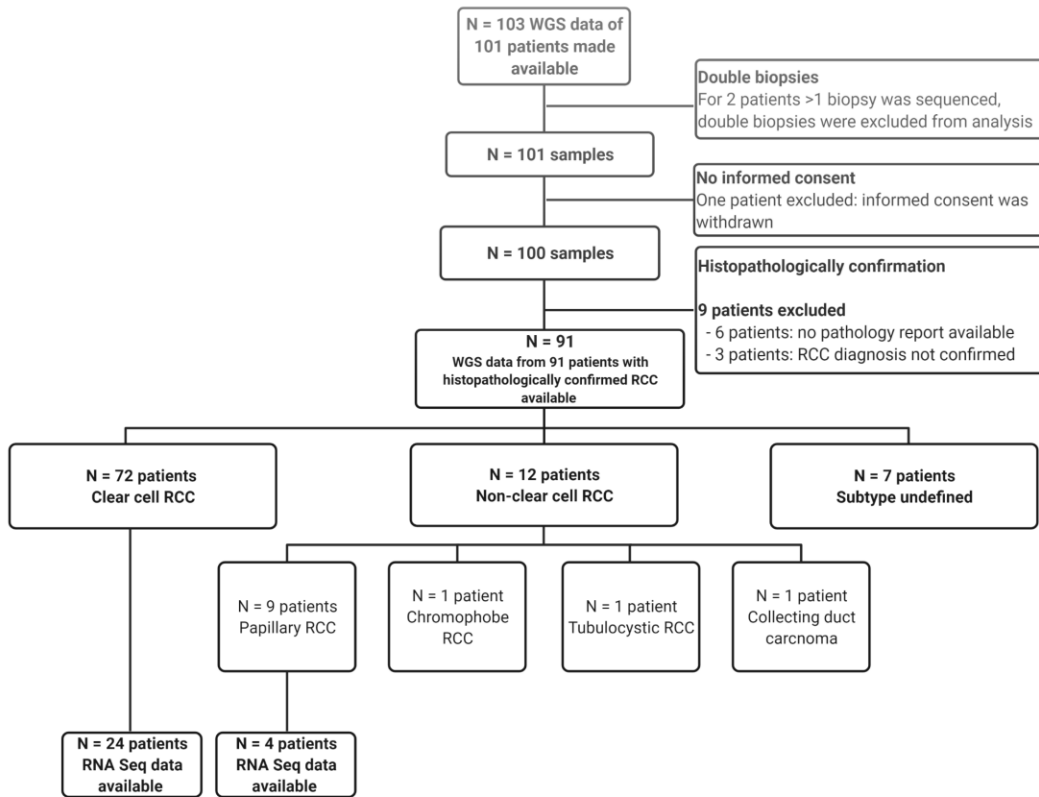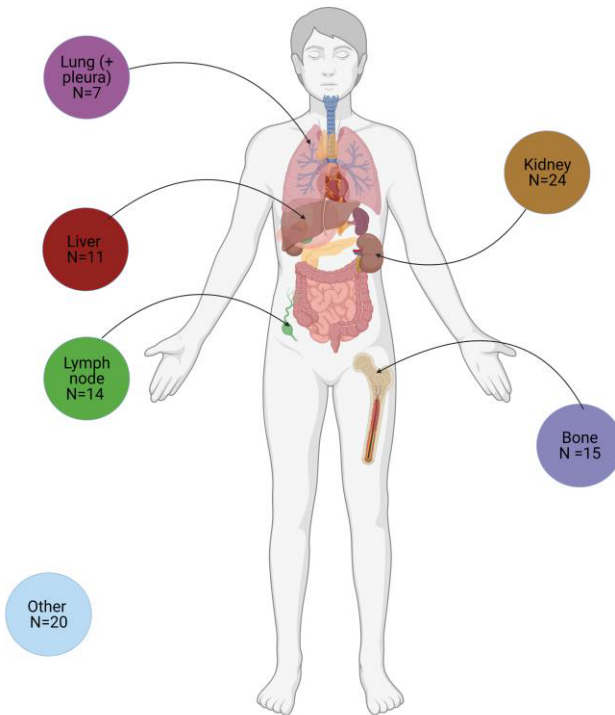

**Figure 2**

**A**

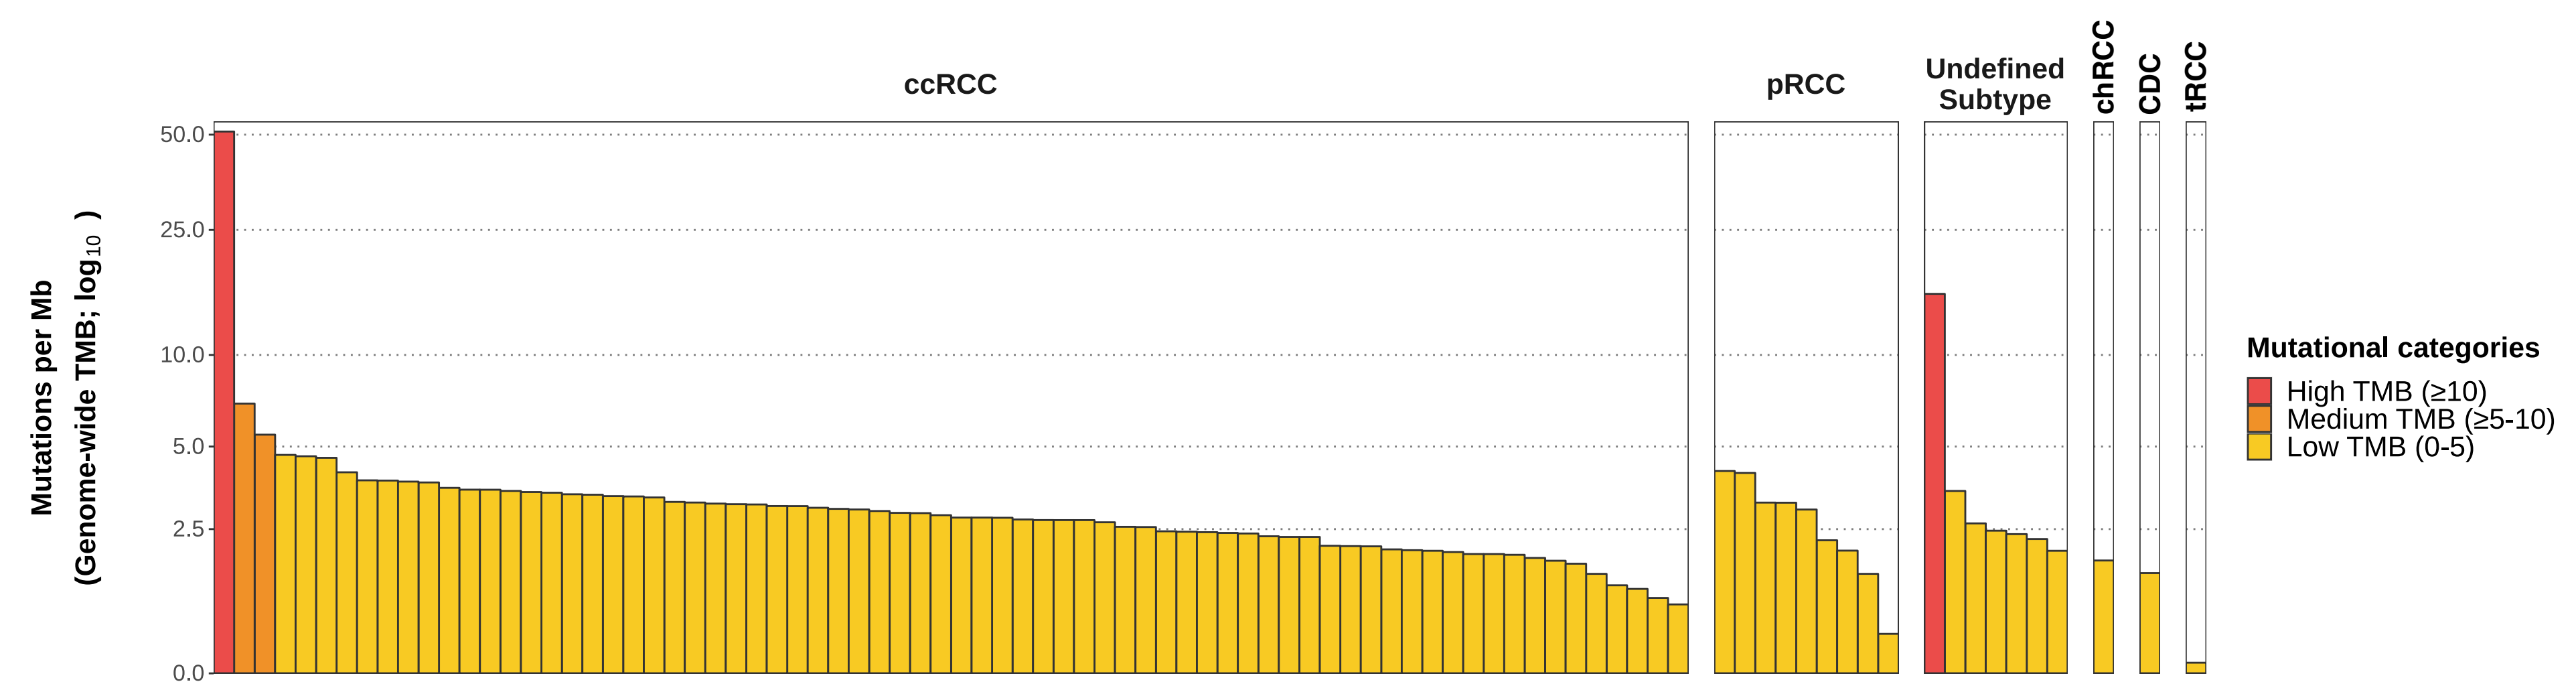

**B**

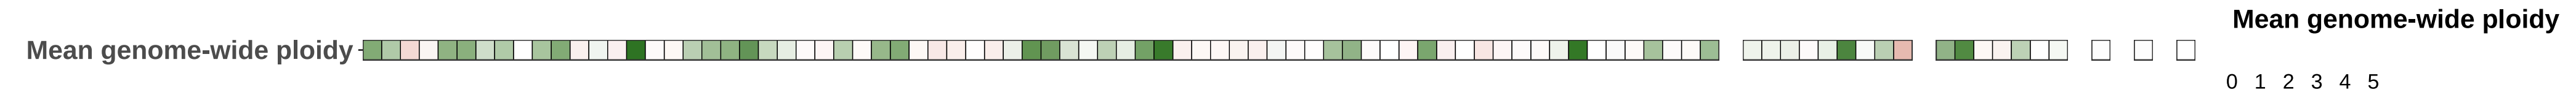

**C**

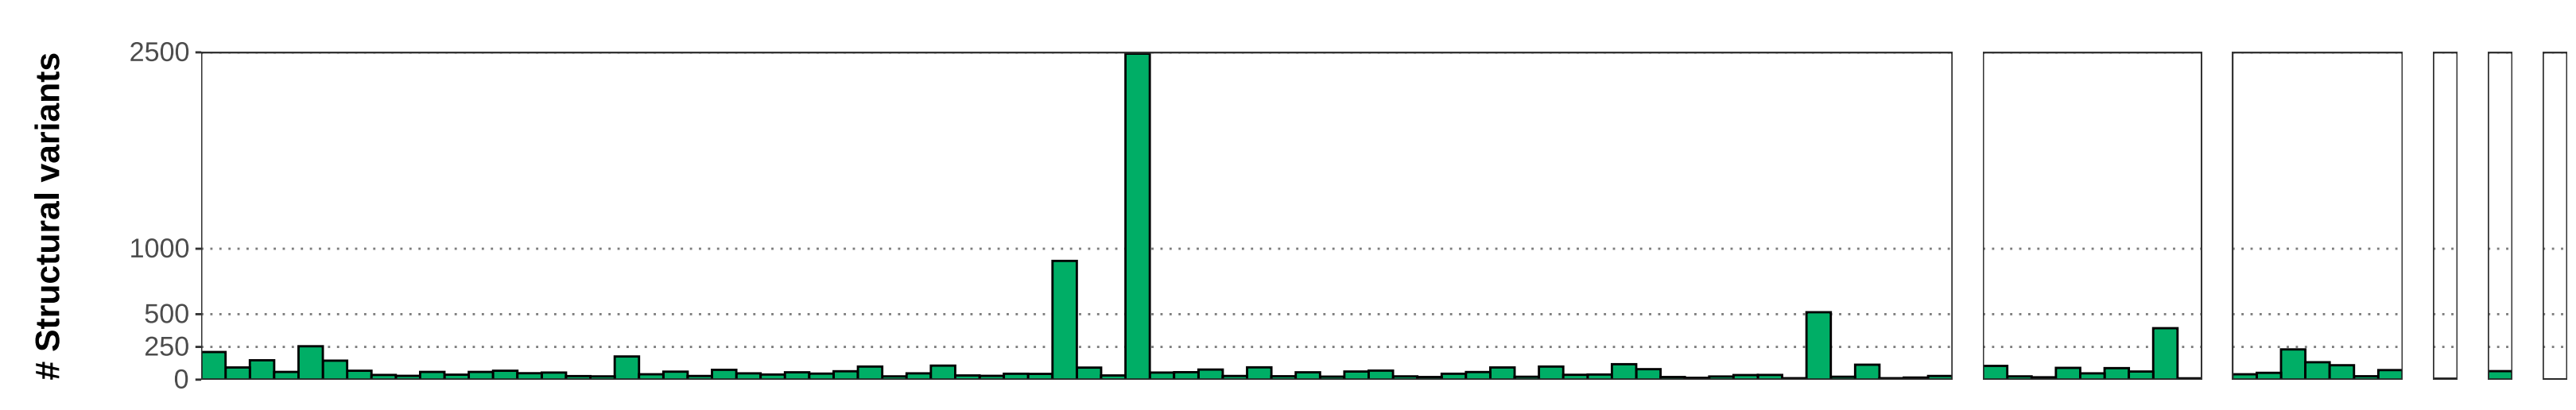

**D**

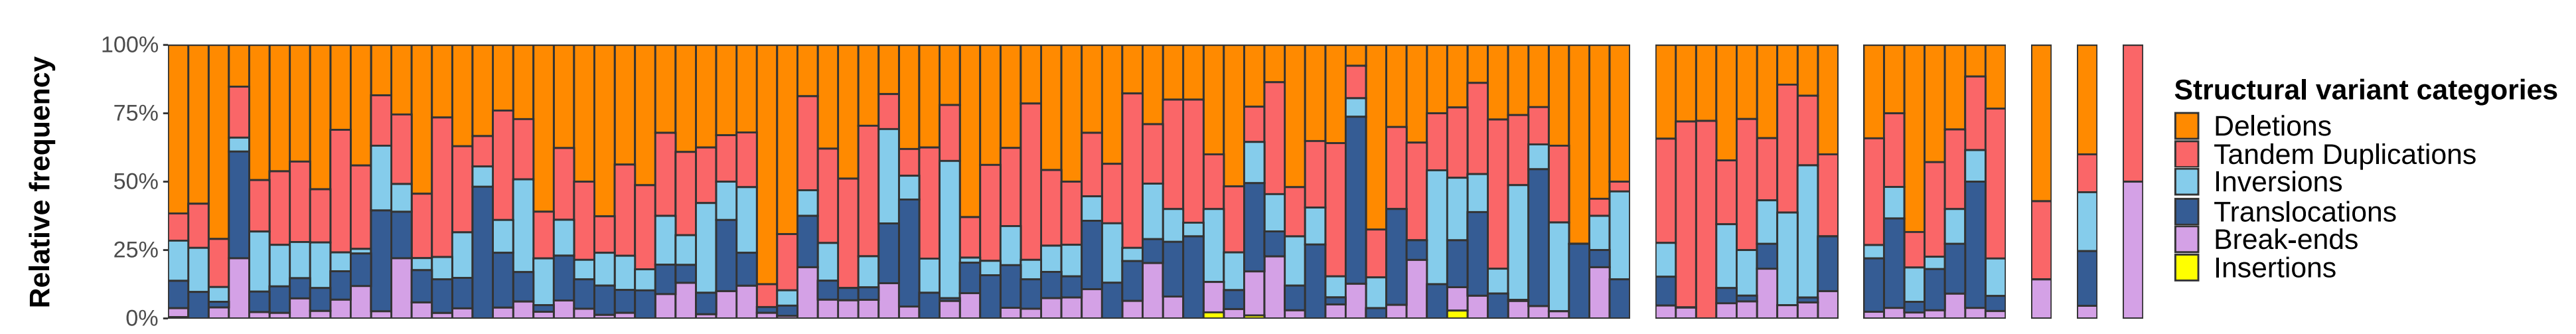

**E**

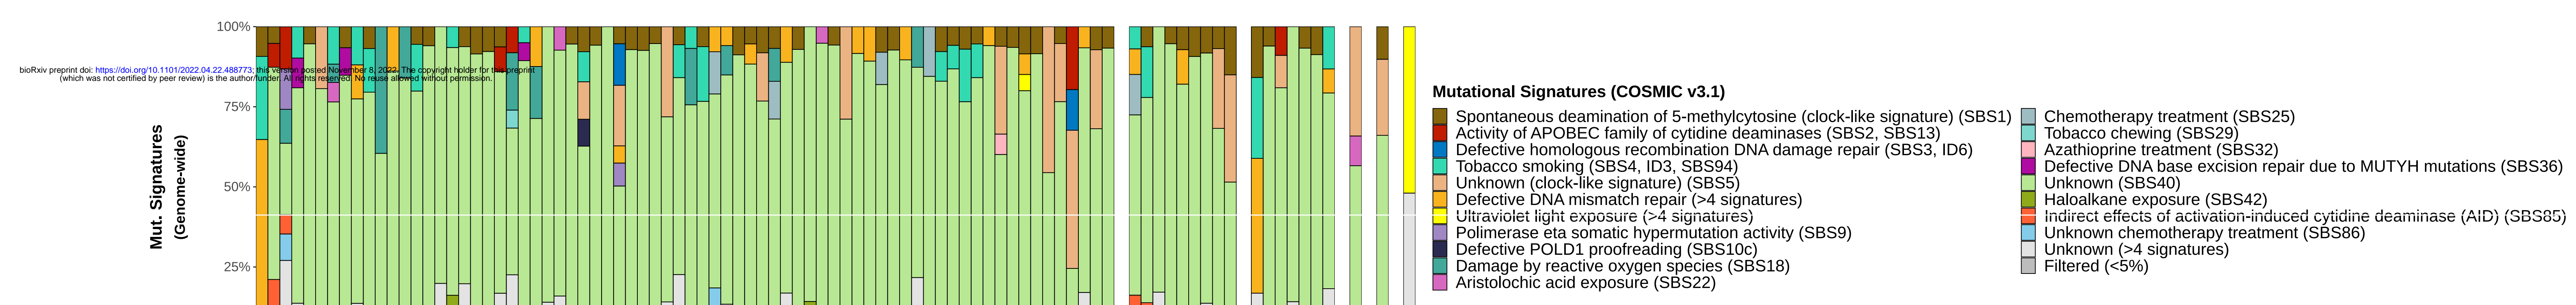

**F**

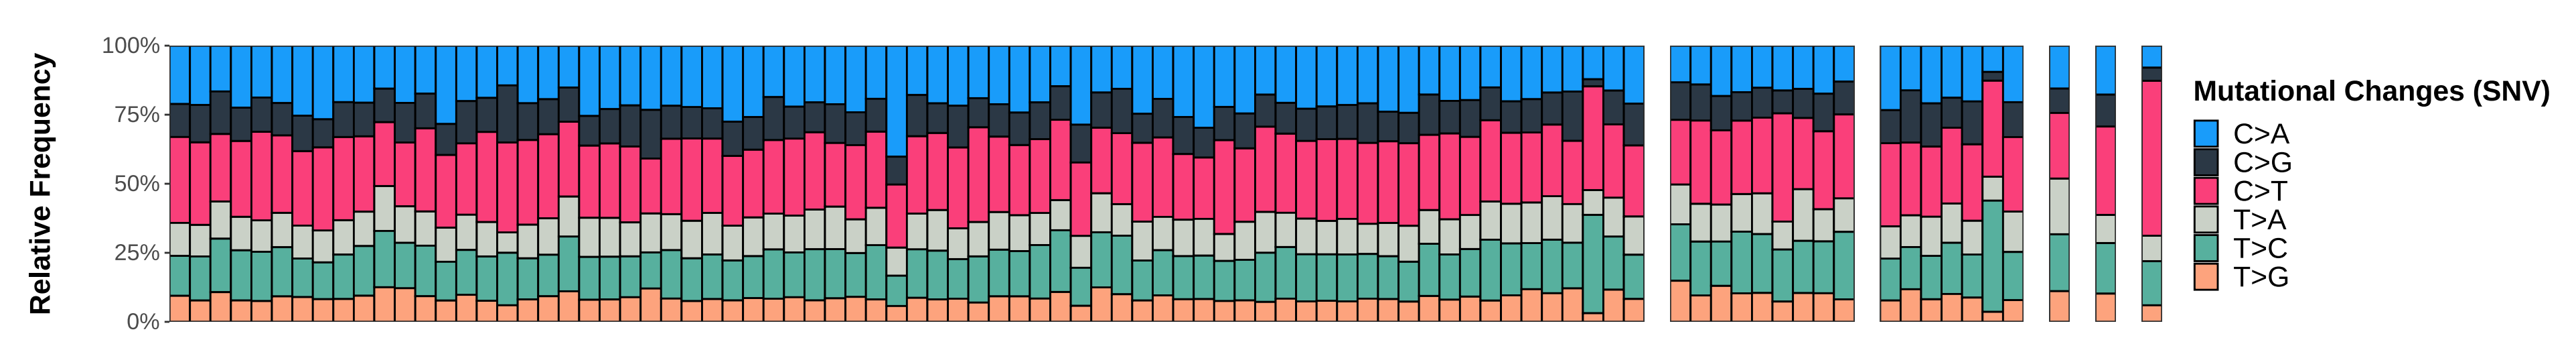

**G**

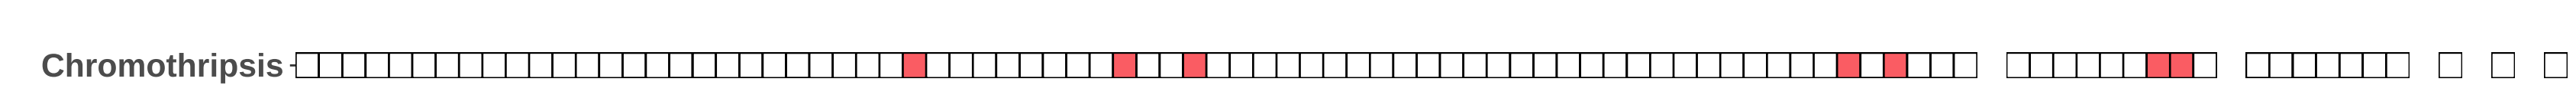

**H**

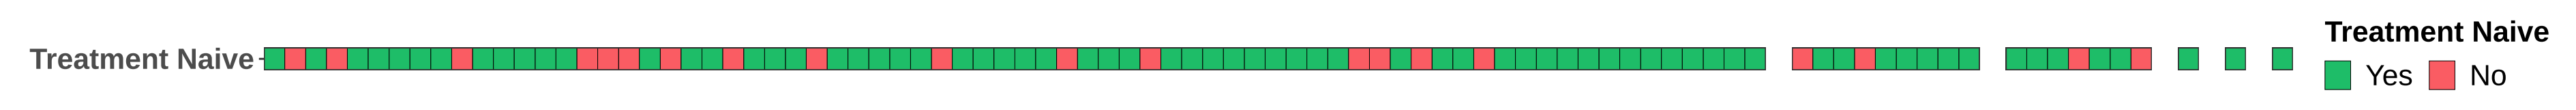

**I**

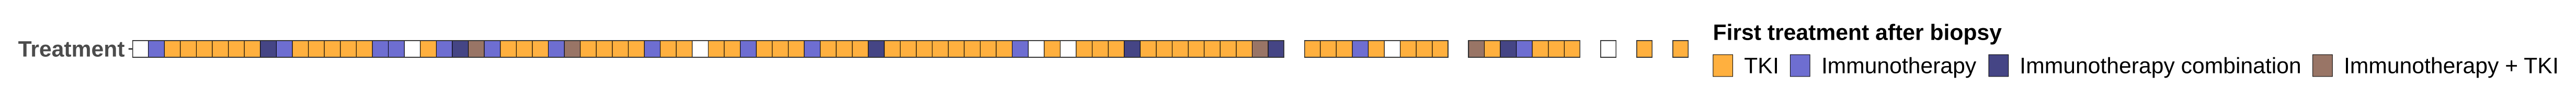

**J**

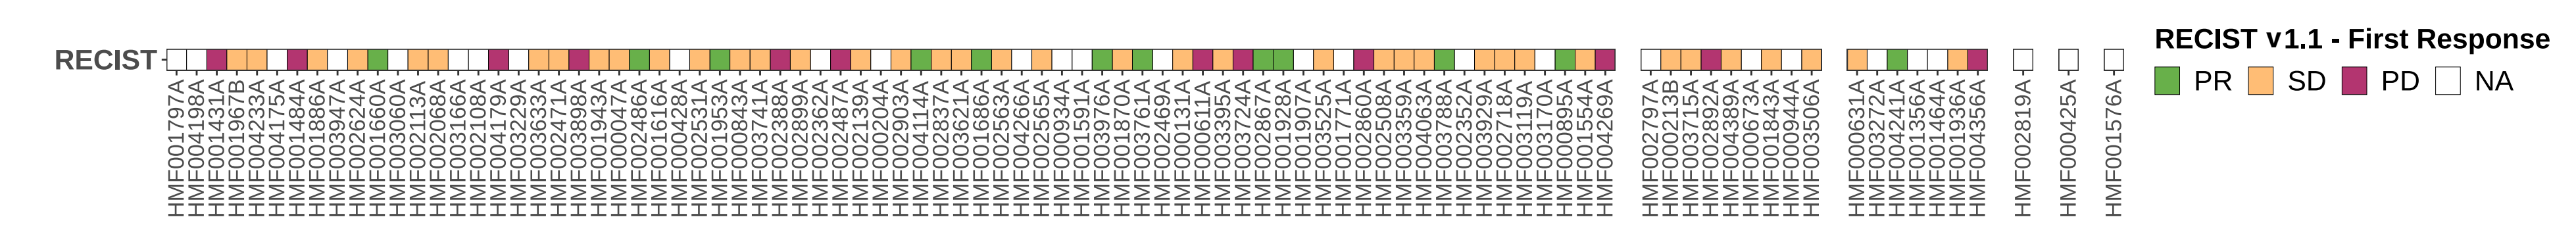



**Figure 3**

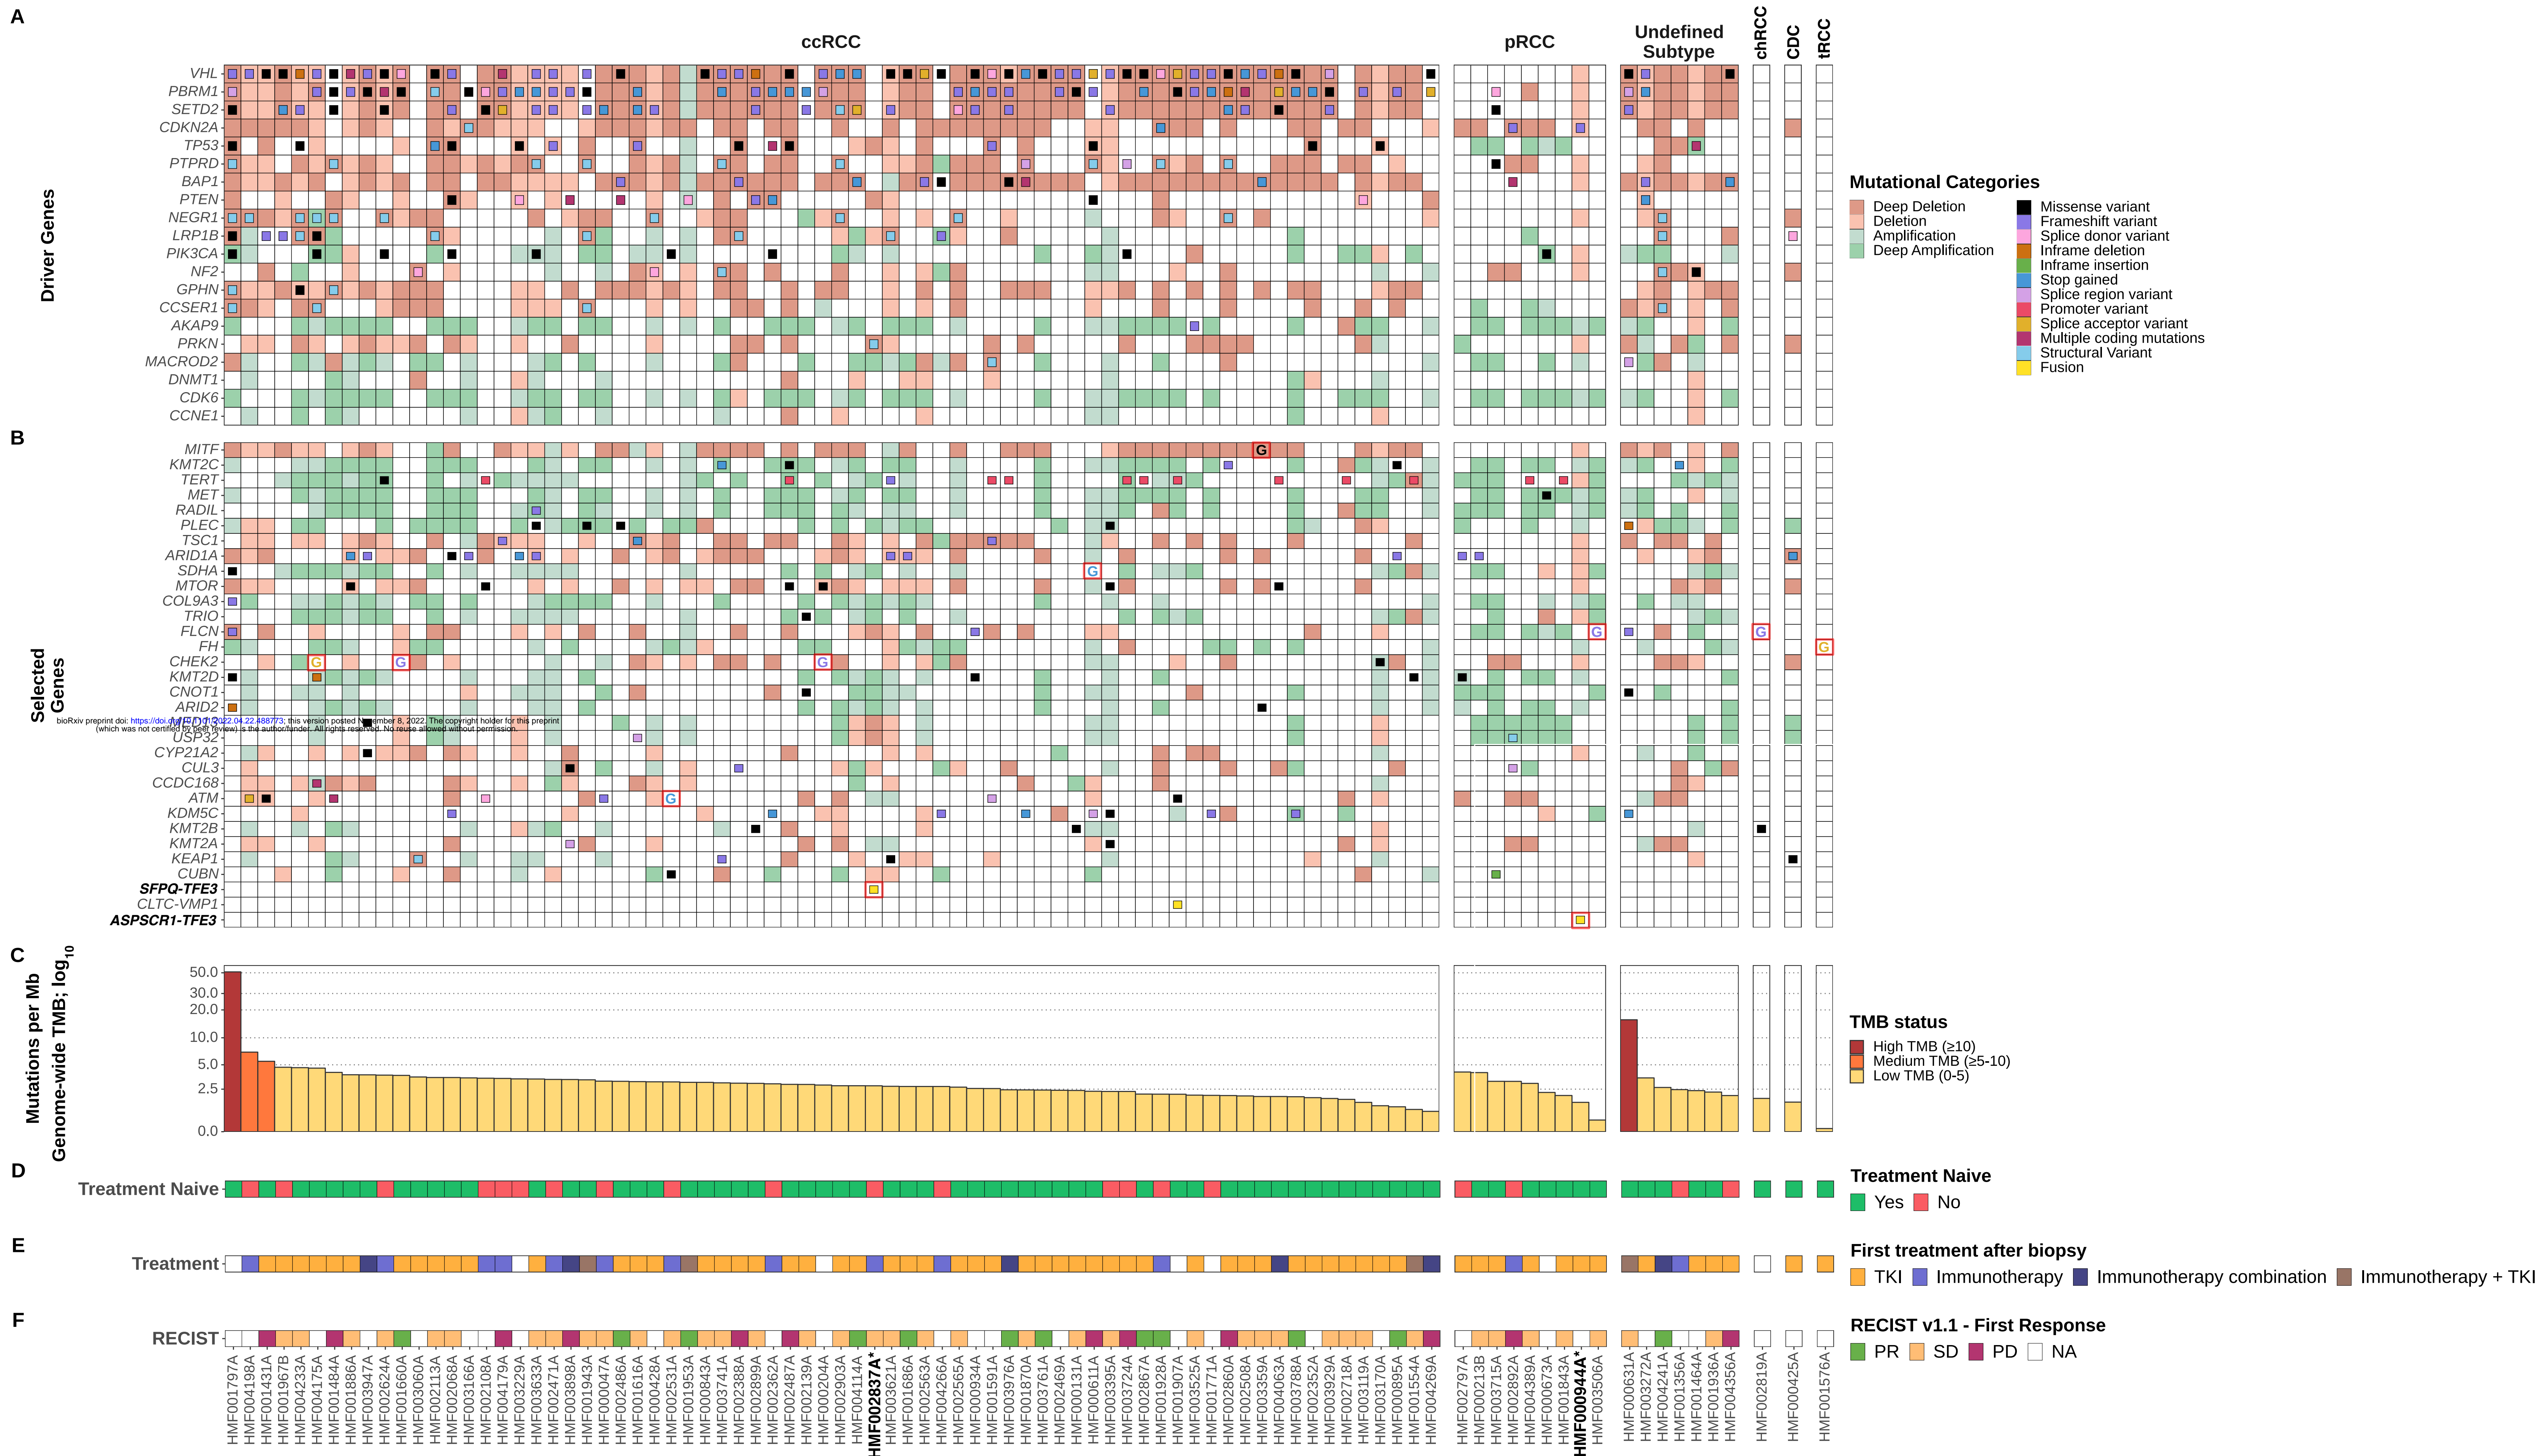

**Figure 4**

**A**

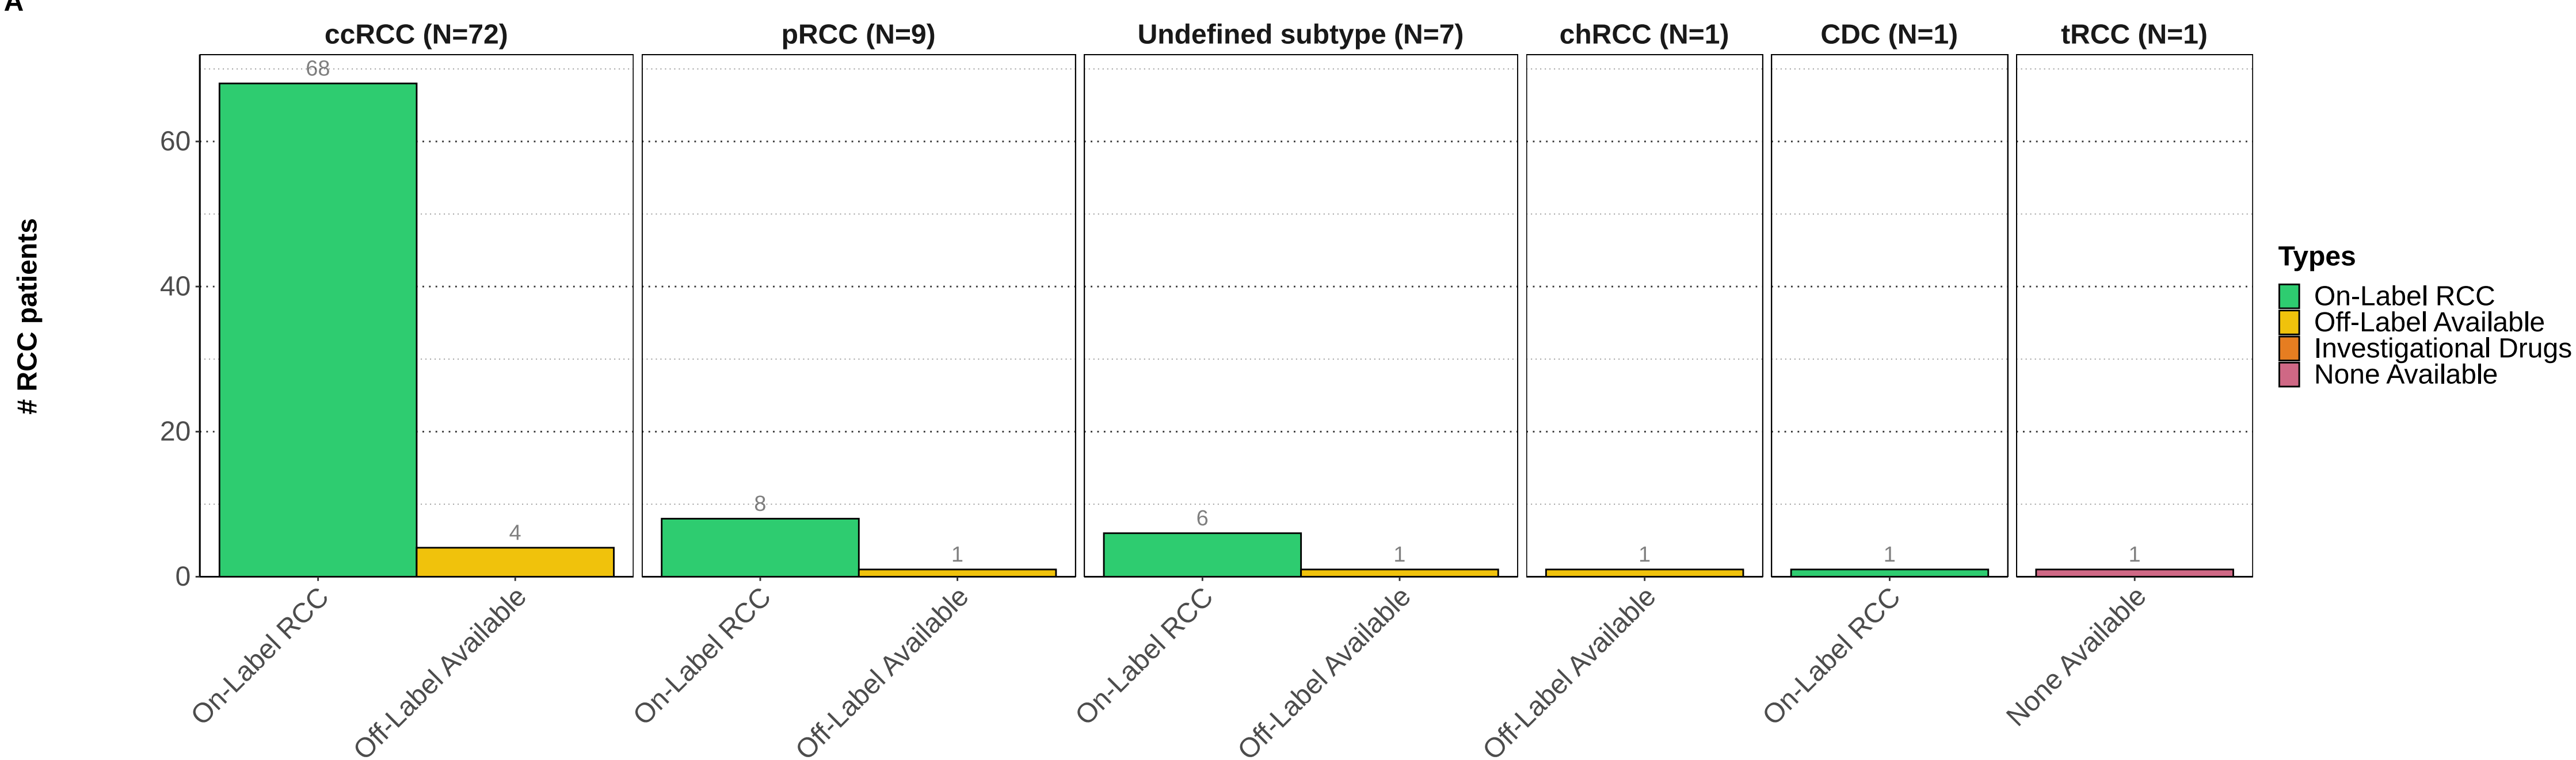

**B**

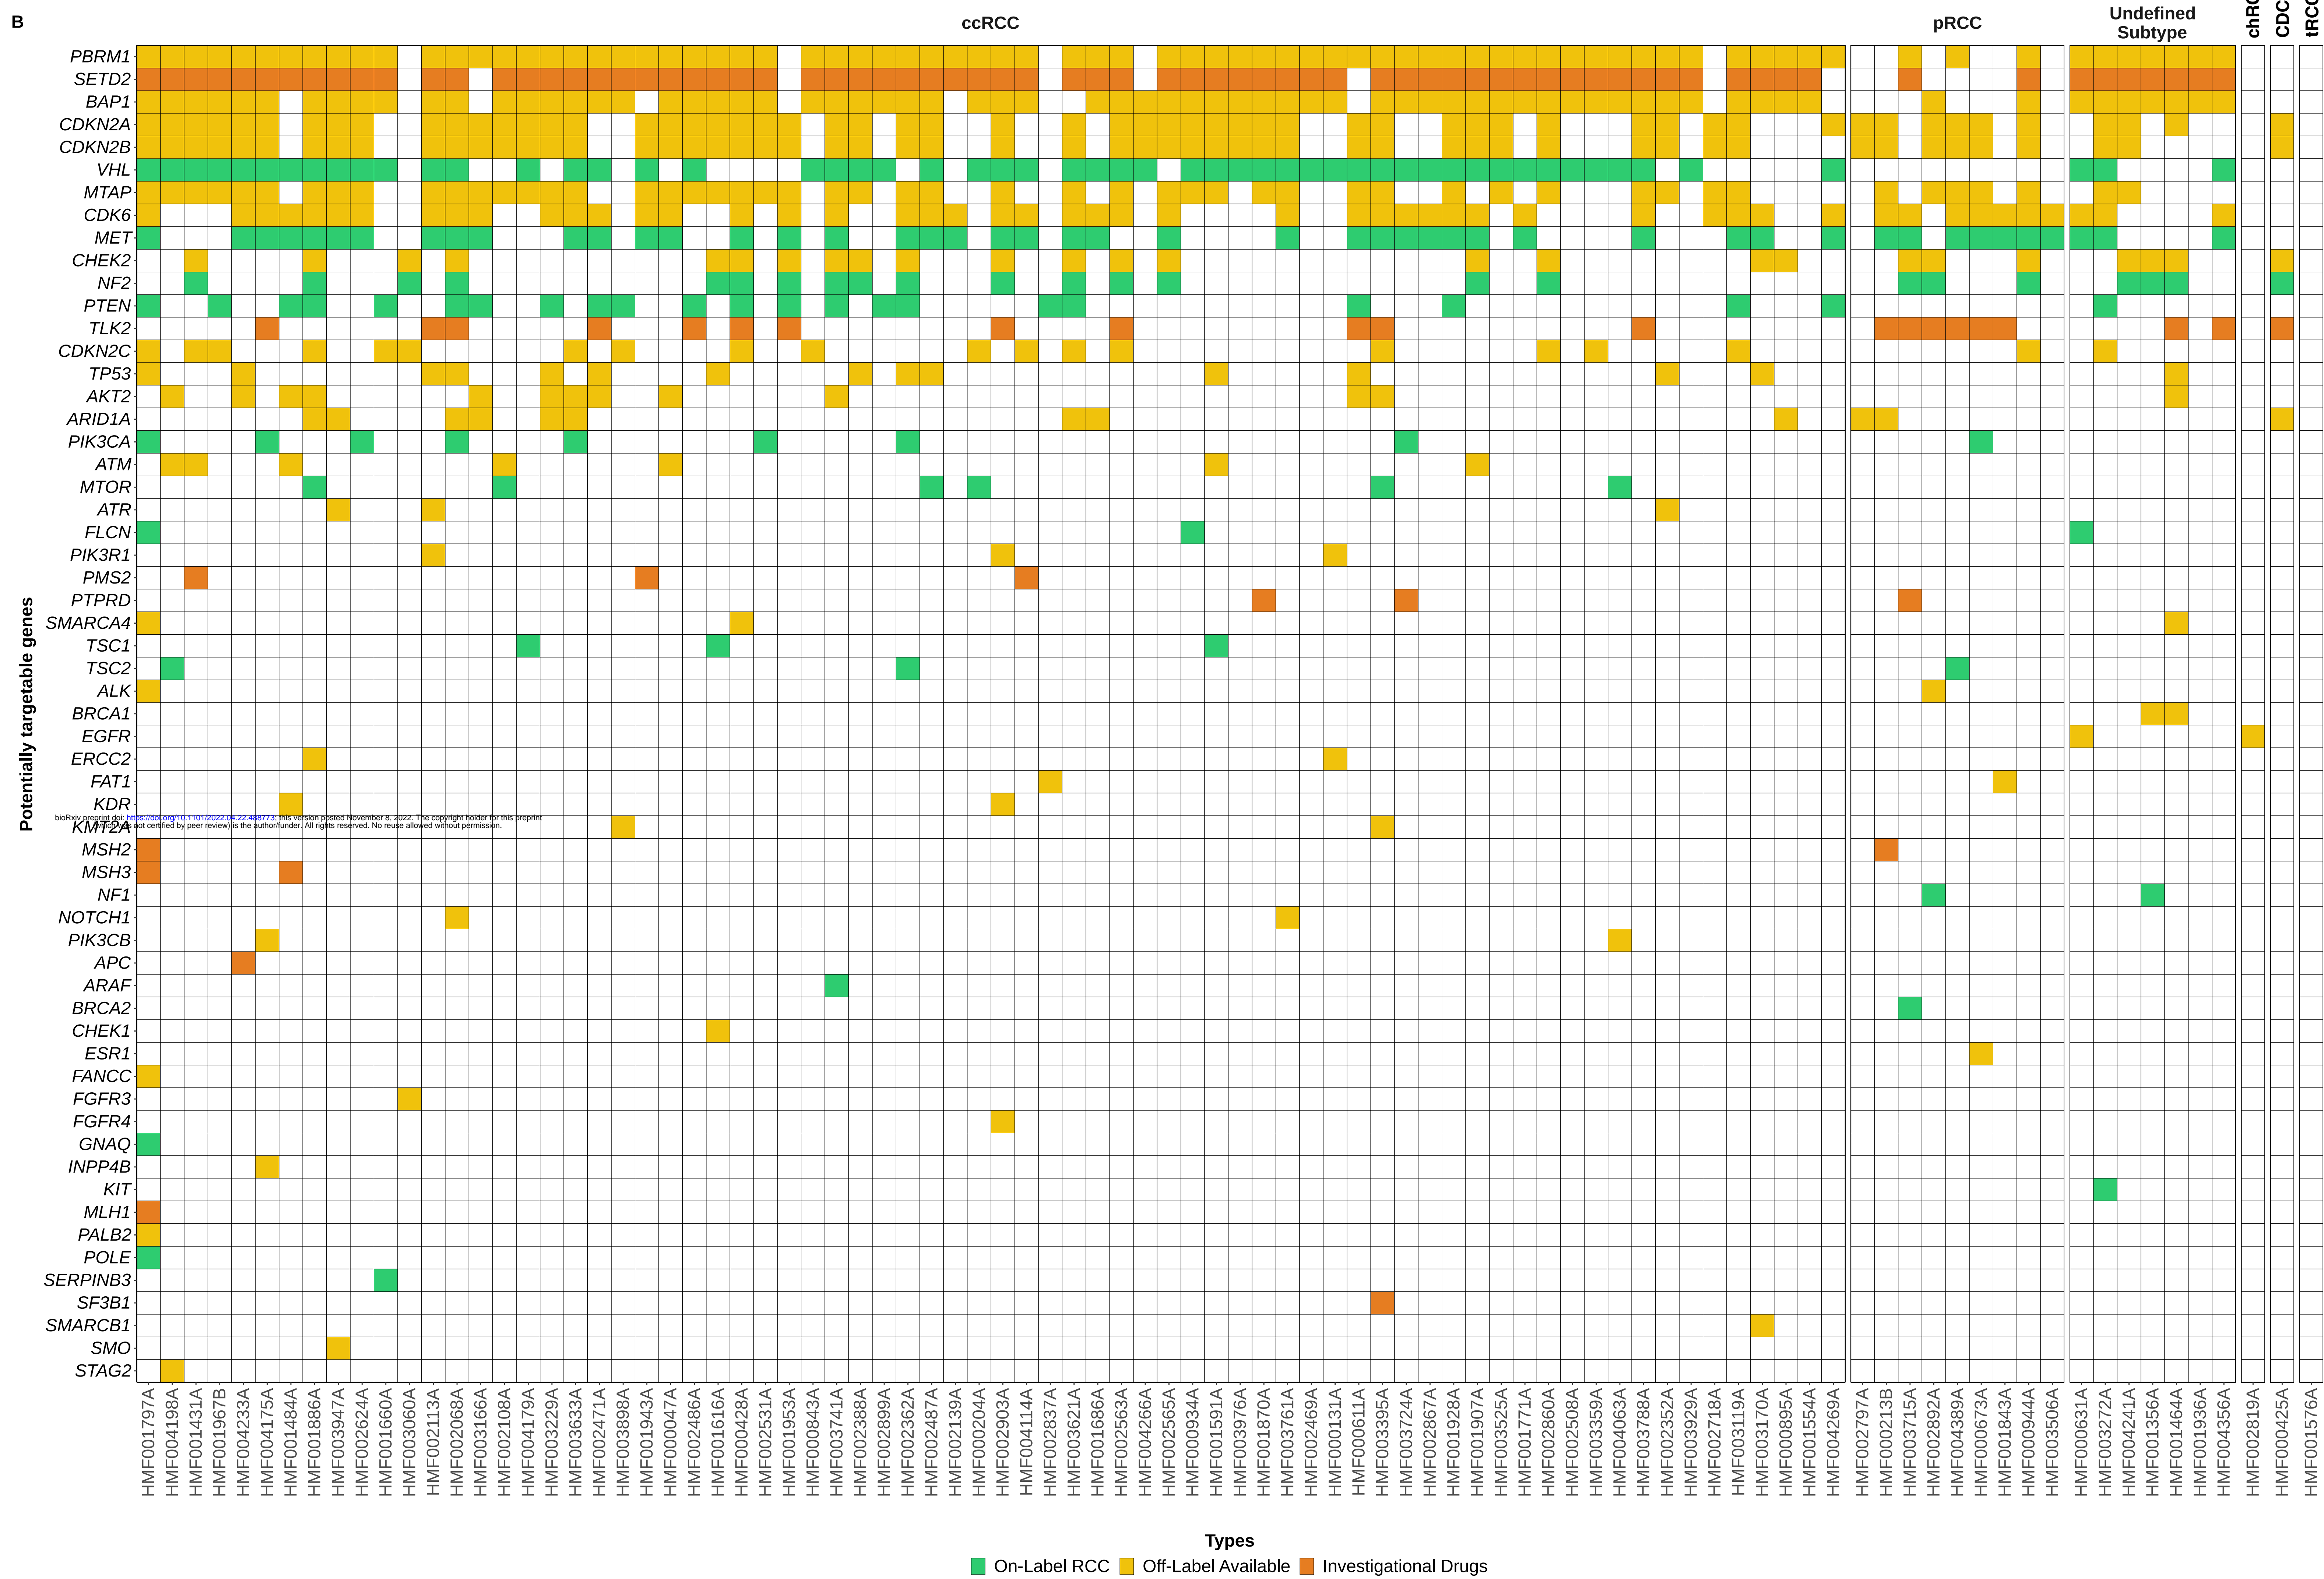

**Figure 5**

**A**

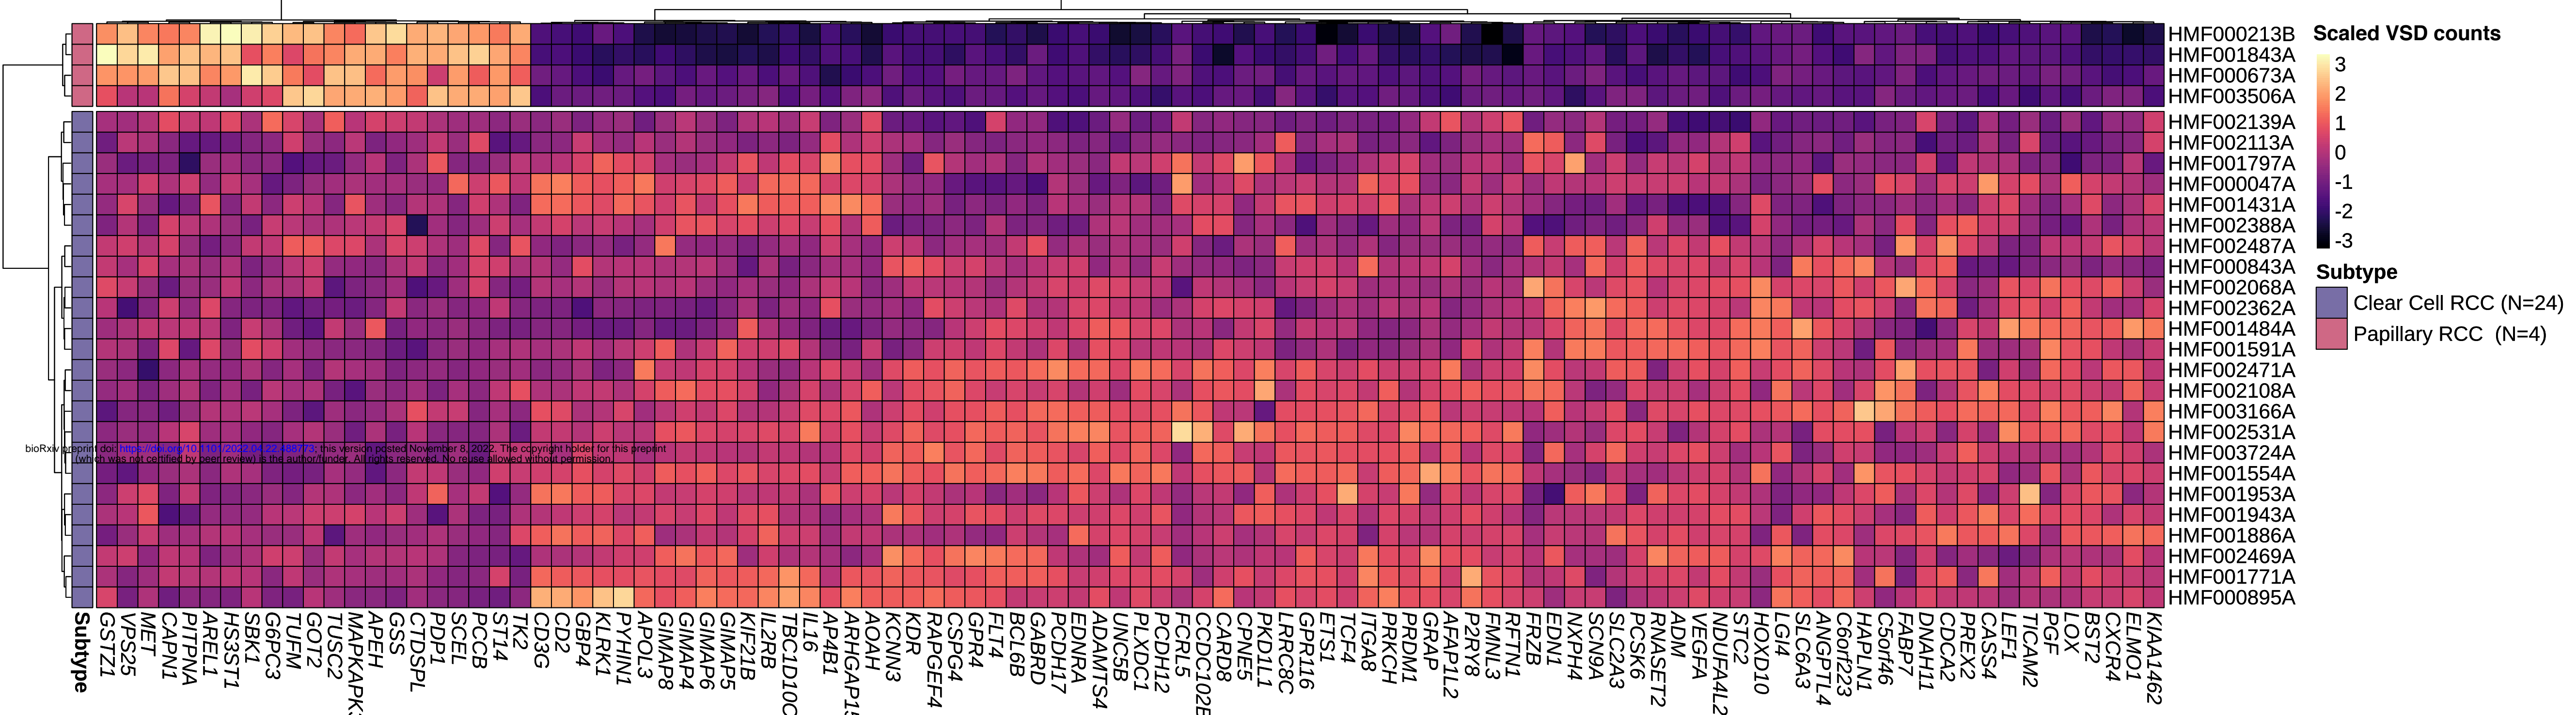

**B**

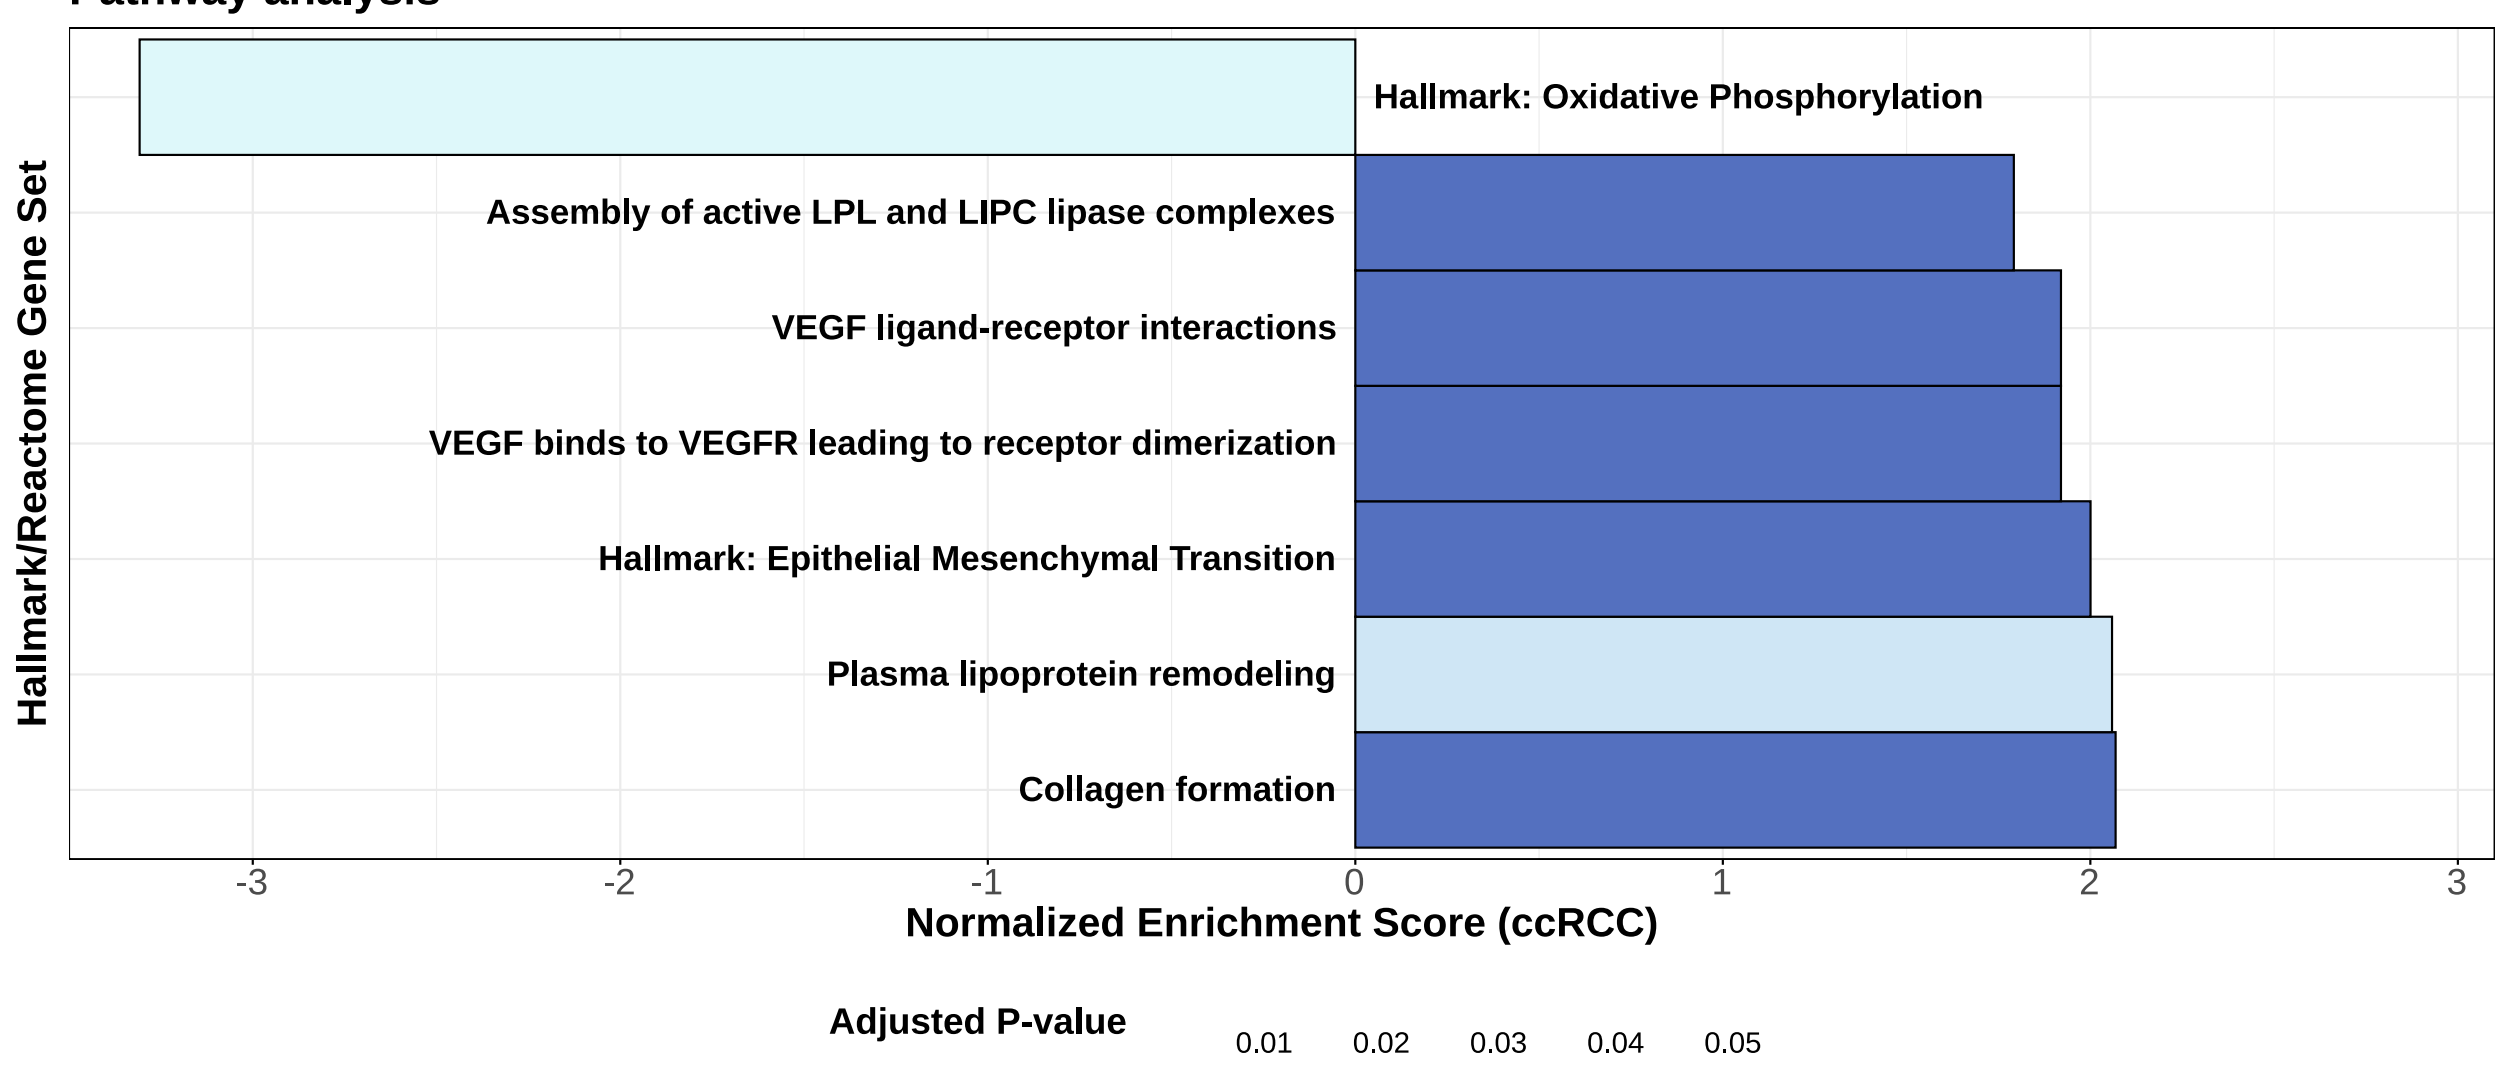

**C**

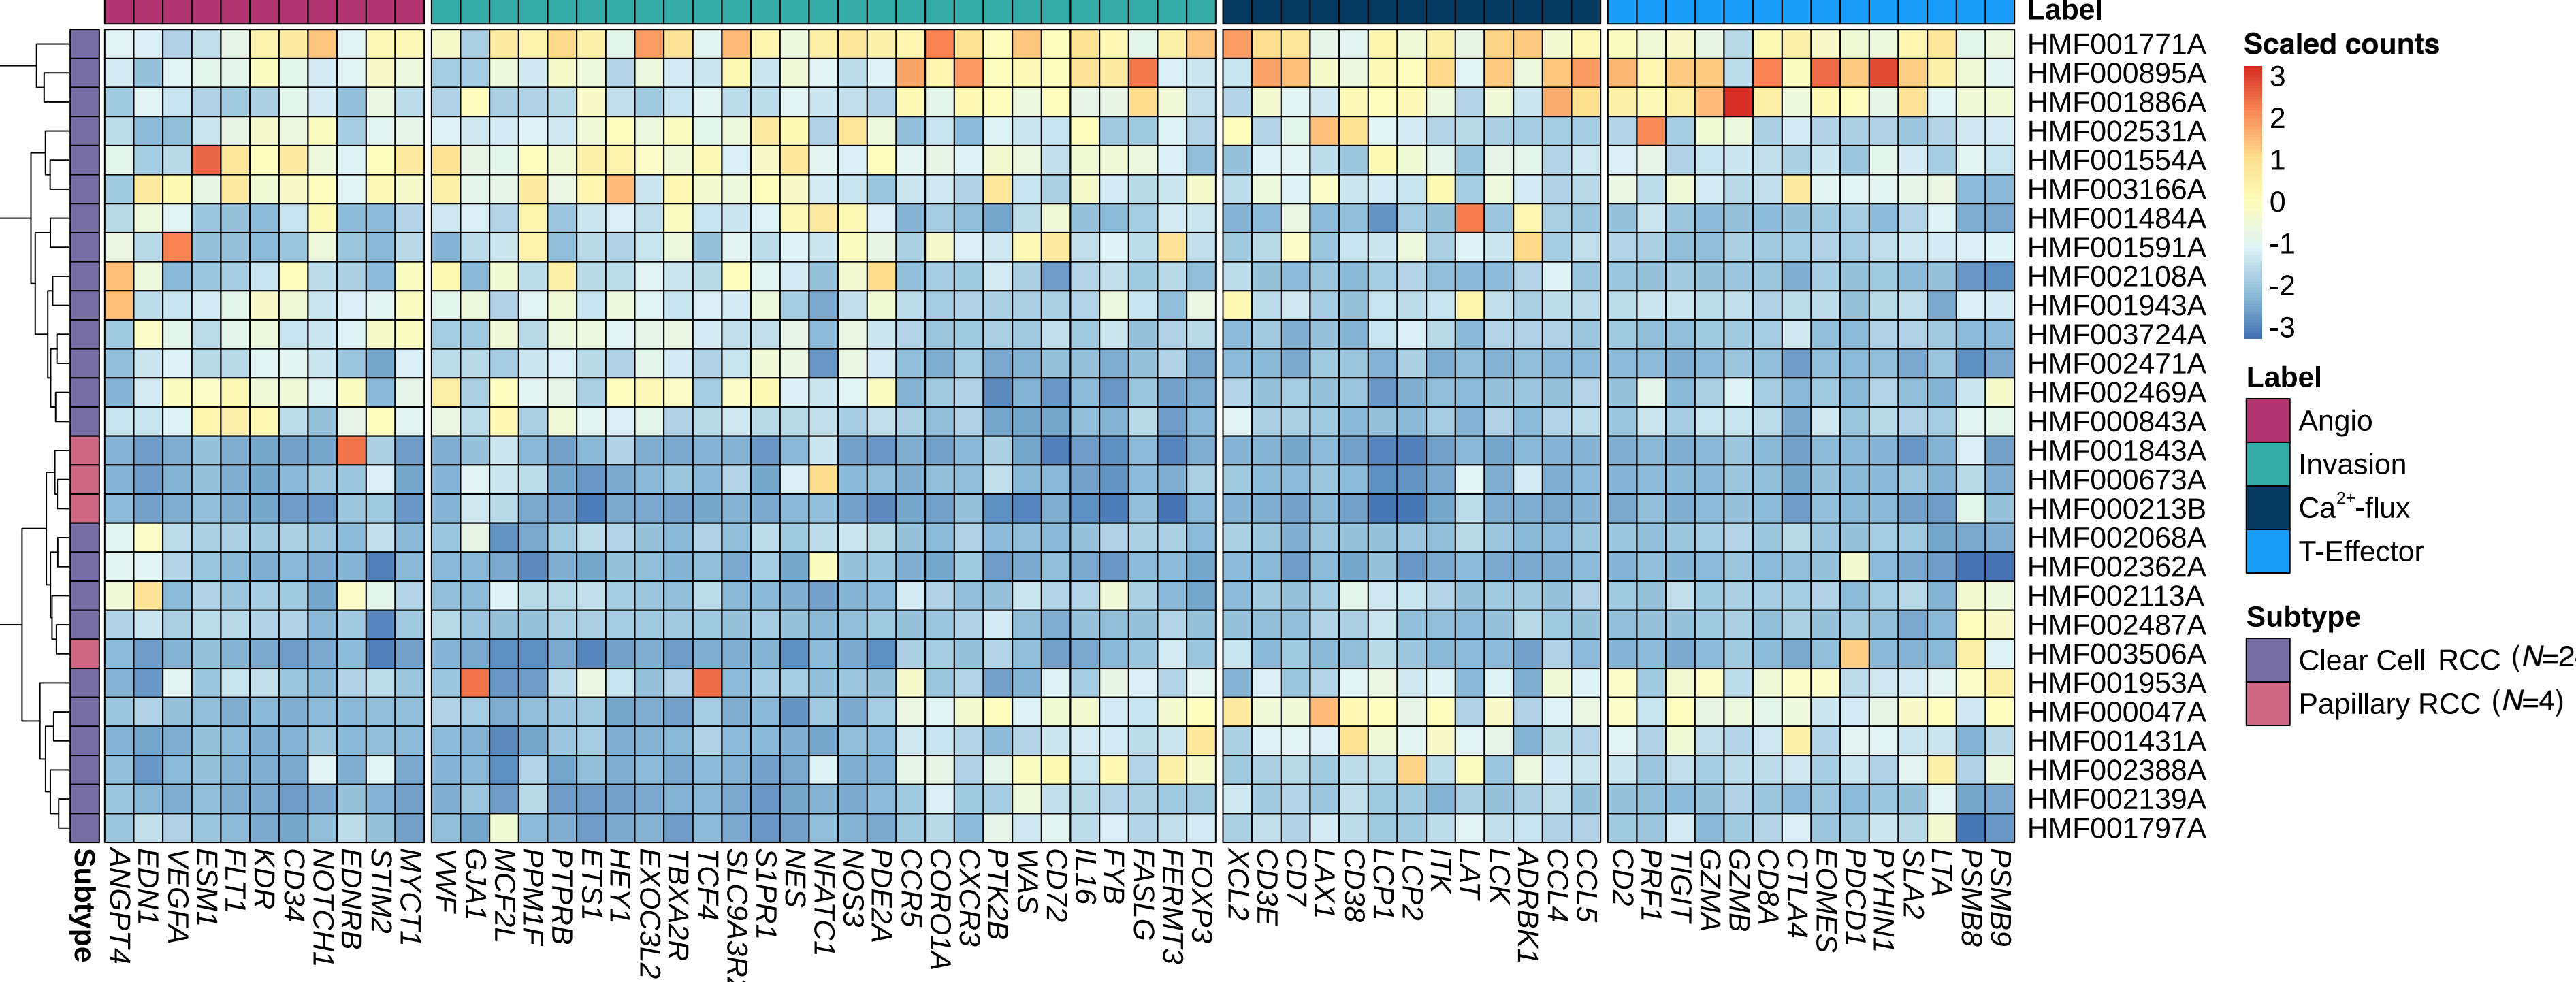

bioRxiv preprint doi: <https://doi.org/10.1101/2022.11.08.508173>; this version posted November 8, 2022. The copyright holder for this preprint (which was not certified by peer review) is the author/funder. All rights reserved. No reuse allowed without permission.
